# Temporal scaling in developmental gene networks by epigenetic timing control

Phuc H.B. Nguyen<sup>1,2\*</sup>, Nicholas A. Pease<sup>1,3\*</sup>, Kenneth K.H. Ng<sup>1</sup>, Blythe Irwin<sup>1</sup>, Hao Yuan Kueh<sup>1#</sup>

<sup>1</sup> Department of Bioengineering, University of Washington

<sup>2</sup> Molecular Engineering and Sciences Institute, University of Washington

5 <sup>3</sup> Molecular and Cellular Biology Program, University of Washington

\* These authors contributed equally to this manuscript

# Lead Contact, Corresponding author: [kueh@uw.edu](mailto:kueh@uw.edu)

## Summary

During development, progenitors follow defined temporal schedules for differentiation, to form  
10 organs and body plans with precise sizes and proportions. Across diverse contexts, these  
developmental schedules are encoded by autonomous timekeeping mechanisms in single cells.  
These autonomous timers not only operate robustly over many cell generations, but can also  
operate at different speeds in different species, enabling proportional scaling of temporal  
schedules and population sizes. By combining mathematical modeling with live-cell  
15 measurements, we elucidate the mechanism of a polycomb-based epigenetic timer, that delays  
activation of the T-cell commitment regulator *Bcl11b* to facilitate progenitor expansion. This  
mechanism generates activation delays that are independent of cell cycle duration, and are  
tunably controlled by transcription factors and epigenetic modifiers. When incorporated into  
regulatory gene networks, this epigenetic timer enables progenitors to set scalable temporal  
20 schedules for flexible size control. These findings illuminate how evolution may set and adjust  
developmental speed in multicellular organisms.

*Keywords:* development, evolution, epigenetics, gene regulatory networks, temporal scaling,  
organism size control, stochasticity, polycomb repressive complex, T-cells.

## INTRODUCTION

25 How are sizes and proportions of organs and body plans set during multicellular development,  
and how can they be adjusted through evolutionary changes? The developmental mechanisms  
controlling size and form must not only facilitate flexible adjustment of individual multicellular  
assemblies, but must also enable proportionally scaled changes in the sizes of different  
assemblies, to flexibly vary total organism size. For over a century, it has been recognized that  
30 the timing of developmental events in the vertebrate embryo is a central determinant of size and  
form (De Beer, 1940; Gould, 1977; Haeckel, 1866; Huxley, 1942). Because progenitors  
continually grow and divide during development, the timing at which they differentiate  
determines their degree of expansion and their final population size; consequently, changes in  
developmental timing can engender variation in size or form. Changes in the timing of  
35 individual lineage specification events can give rise to innovations in shape or form (Alberch et  
al., 1979; Gould, 1977; Huxley, 1932), whereas changes to the overall speed of development can  
lead to proportionally scaled changes in organ and organism sizes (Bonner, 1965; Calder, 1984).

As embryonic development is not coupled to an external clock, the temporal schedules for  
lineage specification must be controlled by mechanisms intrinsic to the embryo itself (Ebisuya  
40 and Briscoe, 2018). These developmental schedules are generally the product of complex  
processes unfolding in space and time in embryo; however, across diverse contexts, there is  
growing evidence that these schedules may largely be set by autonomous timekeeping  
mechanisms operating in single progenitors (Figure 1A) (Burton et al., 1999; Gao et al., 1997;

Heinzel et al., 2017; Otani et al., 2016; Rosello-Diez et al., 2014; Saiz-Lopez et al., 2015). For  
45 example, during cerebral cortex development, neural progenitors follow a defined temporal  
schedule to generate different cortical neurons, where they generate inner layer neurons before  
outer layer neurons. Strikingly, this schedule is recapitulated in progenitors cultured *in vitro* in  
the presence of constant inductive signals, even in the absence of an intact three-dimensional  
tissue environment (Eiraku et al., 2008; Gaspard et al., 2008). Furthermore, while the order of  
50 differentiation remains the same in progenitors from different species, the temporal schedule  
itself is expanded or contracted in an autonomous manner, with total durations ranging from one  
week in mouse progenitors, to months in human progenitors (van den Aemele et al., 2014; Barry  
et al., 2017; Espuny-Camacho et al., 2013; Otani et al., 2016). Such scalability in temporal  
schedules over long timescales enables progenitors to vary output numbers of different cell types  
55 while keeping their proportions constant, and may thus underlie the variability in organ and body  
plan sizes across evolution (Figure 1).

Conserved networks of regulatory genes control cell type specification during development, and  
ultimately dictate when or whether progenitor cells turn on lineage-specifying genes in response  
to signals (Alon, 2007; Briscoe and Small, 2015; Davidson, 2010; Georgescu et al., 2008;  
60 Medina et al., 2005). However, it is unknown how developmental gene networks can generate  
cell-autonomous time schedules that are robust, yet scalable by evolution (Figure 1B).  
Specifically, there are two major issues: First, it is unclear how the developmental gene  
networks can robustly operate over timescales spanning many cell generations. In gene networks  
built from classical biophysical models of gene regulation (Ackers et al., 1982; Alon, 2007;



65 Bintu et al., 2005; Bolouri and Davidson, 2002), network dynamics are determined by the  
mRNA and protein half-lives, which are constrained by cell division and dilution; consequently,  
it is difficult to robustly generate gene activation delays with timescales longer than one cell  
generation (Levine and Elowitz, 2014). Secondly, it is unclear how temporal schedules set by  
developmental gene networks can be coordinately expanded or contracted by evolutionary  
70 variation. Changes in the timing of individual developmental events can occur through  
*cis*-regulatory element mutations at individual regulatory gene loci, as is indeed observed  
(Frankel et al., 2011; Gérard et al., 1997; Khan et al., 2011; Simeonov et al., 2017; Walters et al.,  
1995; Weintraub, 1988); however, it is unclear how coordinated, scaled changes in activation  
timing could occur within an entire regulatory network, particularly between related species where  
75 network components are highly conserved.

Epigenetic mechanisms, involving the polycomb repressive system and its cognate histone  
H3K27 trimethylation (H3K27me3) mark, are important for differentiation in all multicellular  
eukaryotes (Aloia et al., 2013; Xiao and Wagner, 2015), and may play central roles in  
developmental timing control. H3K27me3 modifications are broadly found at lineage-specifying  
80 gene loci in stem and progenitor cells (Boyer et al., 2006; Lee et al., 2006), and are removed in  
response to signals to enable regulatory gene activation and differentiation. While cells  
differentiate with a time delay after sensing developmental signals, H3K27me3 loss is often  
assumed to rapidly follow the binding of transcription factors (Kaneko et al., 2014; Rank et al.,  
2002; Riising et al., 2014), whose slow accumulation is thought to set the pace for downstream

85 gene activation. However, other studies have found that the process of H3K27me3 removal may  
itself be slow (Berry et al., 2017; Kaikkonen et al., 2013; Mayran et al., 2018), and may generate  
long time delays prior to gene activation and cell differentiation (Angel et al., 2011; Bintu et al.,  
2016), even when upstream transcription factors are fully present. An ability to generate delays,  
together with broad action at many gene loci, could enable H3K27me3 and polycomb regulators  
90 to act coordinately at many loci in regulatory gene networks to control developmental speed and  
population size expansion. However, the dynamics and biophysical mechanisms by which these  
factors control regulatory gene activation remain unclear, because it has been difficult to resolve  
these processes in living cells.

To gain insights into these questions, we investigate an epigenetic mechanism controlling the  
95 activation timing of *Bcl11b*, a T-cell lineage commitment regulator that turns on with an  
extended delay to enable early progenitor expansion (Figure 2A). After entering the thymus,  
hematopoietic progenitor cells turn on *Bcl11b* to commit to the T-cell lineage (Hosokawa et al.,  
2018; Ikawa et al., 2010; Li et al., 2010a, 2010b). *Bcl11b* activation requires Notch signals in  
the thymus, along with multiple transcription factors that are up-regulated by Notch signaling  
100 (García-Ojeda et al., 2013; Germar et al., 2011; Li et al., 2010b; Weber et al., 2011). However,  
while all these factors are induced shortly after thymic entry, *Bcl11b* activation and T-cell lineage  
commitment occurs only ~5-10 days later, during which cells expand by approximately a  
thousand-fold (Manesso et al., 2013; Porritt et al., 2003). To determine whether this time delay

may be the result of epigenetic mechanisms acting on individual *Bcl11b* loci, we generated a  
105 reporter mouse, where two *Bcl11b* loci were tagged with distinguishable fluorescent protein  
expression reporters (Ng et al., 2018). By separately following the activation dynamics of two  
*Bcl11b* loci in single progenitors from these mice, we found evidence that a slow, stochastic  
epigenetic event, occurring on the *Bcl11b* locus, generates a multi-day time delay in *Bcl11b*  
activation and T-cell commitment (Figure 2A). This finding shows that epigenetic mechanisms  
110 can act in *cis* to generate time delays in gene activation and fate commitment, and establishes a  
unique model for studying these mechanisms in single, living cells.

In this study, we first elucidate the mechanism of the epigenetic timer controlling *Bcl11b*  
activation. To do so, we combine quantitative, single-cell measurements in this dual-reporter  
system with analysis of candidate biophysical mechanisms using mathematical modeling. Next,  
115 by modeling developmental gene networks built from these epigenetic timers, we propose a  
solution for how temporal schedules for development can be scaled to vary size while  
maintaining proportions. We find that this epigenetic timing mechanism involves delayed,  
all-or-none removal of a repressive H3K27me3 domain from the gene locus, and can set delays  
that are robust over many cell generations, yet are tunable by activities of histone-modifying  
120 enzymes. The delays set by this epigenetic timer are unaffected by changes in cell cycle  
duration, enabling independent control of proliferation and developmental timing in developing  
progenitors. When incorporated as a building block of developmental gene networks, this

epigenetic timer enables progenitors to set schedules for differentiation that are flexibly expandible or compressible in time, by tuning of the strength of epigenetic repression. These findings establish a biophysical basis for understanding dynamic gene activation control by epigenetic mechanisms, and reveal insights into how developmental speed and organism size are controlled in development and evolution.

## RESULTS

The dual-allelic *Bcl11b* reporter system provides a unique, powerful tool to resolve epigenetic mechanisms controlling gene activation timing in living cells. To study the *cis*-epigenetic event controlling *Bcl11b* activation timing in isolation from other *trans*- events, we can analyze *Bcl11b* locus activation dynamics in progenitors that already have one *Bcl11b* allele active, and therefore must contain all *trans*-factors necessary for expression (Figure 2B). Using fluorescence-activated cell sorting, we purified monoallelic expressing *Bcl11b* DN2 progenitors from dual-allelic reporter mice (YFP<sup>+</sup>RFP<sup>-</sup> or YFP<sup>-</sup>RFP<sup>+</sup>), and analyzed activation of the silent allele by co-culture with OP9-DL1 cells, an *in vitro* system that recapitulates all early transitions in T-cell development. In agreement with previous work (Ng et al., 2018), the inactive *Bcl11b* allele turned on in an all-or-none manner, with slow onset timing over the course of five days (Figure 2C-D). Furthermore, activation kinetics were similar for both YFP and RFP alleles ( $k = 0.025 \pm 0.005 \text{ hrs}^{-1}$  for YFP allele and  $k = 0.034 \pm 0.009 \text{ hrs}^{-1}$  for RFP allele), and were well described by a single exponential curve, consistent with activation being controlled by a single stochastic event occurring with equal likelihood at the two loci, with a timescale of days.

### Developmental timing control by H3K27me3 mark removal

145 Polycomb associated histone modification H3K27me3 is highly enriched at silent *Bcl11b* loci in hematopoietic stem and progenitor cells but not in committed T-cells, where *Bcl11b* is expressed (Zhang et al., 2012); thus, its removal could underlie the *cis*-epigenetic event controlling *Bcl11b* activation timing. To test this possibility, we first determined whether H3K27me3 marks are removed from the *Bcl11b* locus at the same time it turns on. To pinpoint when H3K27me3 loss occurs relative to locus activation, we measured H3K27me3 levels in three populations having  
150 different numbers of active *Bcl11b* alleles: hematopoietic progenitor cells from bone marrow, which have both *Bcl11b* alleles inactive; monoallelic *Bcl11b* expressing DN2 progenitors, which have one active and one inactive *Bcl11b* allele; and biallelic *Bcl11b* expressing DN2 progenitors, which have both *Bcl11b* alleles active. We employed CUT&RUN, a novel nuclease-based method for mapping DNA-protein complexes that can be combined with spike-in controls to  
155 provide quantitative readouts of H3K27me3 genomic abundance comparable across samples (Skene et al., 2018). If H3K27me3 marks are removed concurrently with *Bcl11b* activation, but not any sooner or later, we would expect H3K27me3 levels in monoallelic DN2 progenitors to fall to approximately half of the initial levels found in HSPCs and to approximately zero in biallelic DN2 progenitors. Indeed, H3K27me3 levels at the *Bcl11b* locus decreased across these  
160 populations in a manner consistent these predictions. In bone marrow progenitors, where both *Bcl11b* alleles are inactive, there was an abundance of H3K27me3 across 5' end of *Bcl11b* (Figure 3A, yellow shaded region). These broad H3K27me3 peaks were roughly halved in monoallelic *Bcl11b* expressing cells, and were almost completely absent in *Bcl11b* biallelic cells

(Figure 3A, 0.5 and 0.1 for monoallelic and biallelic *Bcl11b* expressing progenitors, respectively). Thus, H3K27me3 repressive mark removal from the *Bcl11b* locus occurs  
165 concurrently with gene activation.

H3K27me3 mark loss may control the timing of *Bcl11b* activation; alternatively, it may simply be a consequence of gene activation, due to clearance of methylated nucleosomes by active transcription (Hosogane et al., 2016; Kraushaar et al., 2013). To determine whether H3K27me3  
170 loss plays a causal role in controlling *Bcl11b* activation timing, we purified monoallelic *Bcl11b* expressing DN2 progenitors, co-cultured them on OP9-DL1 cells for three days with small molecule inhibitors targeting H3K27me3-modifying enzymes, and analyzed the resultant effects on activation of the silent *Bcl11b* locus (Figure 3B). These inhibitors, which target either the PRC2 methyltransferase subunit Ezh2 (UNC1999, 2.5  $\mu$ M) or the H3K27 demethylases  
175 Kdm6a/b (GSK-J4, 2.5  $\mu$ M), resulted in a ~40% increase and ~60% decrease, respectively, in H3K27me3 abundance at the *Bcl11b* promoter of *Bcl11b* monoallelic cells (Figure 3C), indicating that they indeed modulate H3K27me3 levels at inactive *Bcl11b* loci.

In the absence of any inhibitors, the majority of progenitors activated the silent *Bcl11b* allele after three days, leaving about ~30% remaining inactive, as expected (Figure 3D-E). Kdm6  
180 demethylase inhibition increased the fraction of progenitors with remaining inactive *Bcl11b* alleles (Figure 3D, 3E, from 30% to 36% YFP inactive;  $p = 0.007$ ). Impeded *Bcl11b* activation reflects a specific consequence of Kdm6a/b inhibition, as similar effects were observed with IOX-1, another inhibitor of Kdm6a/b, but not with Daminozide, a broad demethylase inhibitor

that does not target Kdm6a/b (Figure S1A). Conversely, Ezh2 inhibition decreased the fraction  
185 of progenitors with remaining inactive alleles (Figure 3E from 30% to 20% RFP inactive;  $p =$   
0.001 ; 30% to 21%YFP inactive;  $p = 0.007$ ). Similar effects were observed using structurally  
unrelated Ezh2 inhibitors GSK-126 and GSK-343 (Figure S1A) as well as small hairpin RNAs to  
knock down the expression of Eed, another essential PRC2 subunit (Figure 3D, S1B). We note  
190 that all the H3K27me3 perturbations tested had no effect on *Bcl11b* expression levels after  
activation (Fig. 3D), consistent with a specific role for this modification system in the control of  
gene activation timing. Taken together, these results indicate that H3K27me3 removal from the  
*Bcl11b* locus plays a causal role in controlling *Bcl11b* activation timing, and further show that the  
time constant for this activation event is tunably set by the balance between PRC2 and Kdm6a/b  
demethylase activities at the gene locus.

### 195 **A mathematical model of epigenetic timer function**

In a number of systems, loss of H3K27me3 occurs through passive dilution of these repressive  
marks with DNA replication (Coleman and Struhl, 2017; Sun et al., 2014), a mechanism that  
could potentially account for the long activation delays spanning many cell generations observed  
(Ng et al., 2018; Fig. 1). However, the involvement of both PRC2 and Kdm6a/b demethylases in  
200 setting the timing for *Bcl11b* activation, as observed (Fig. 3), argues against such a passive  
H3K27me3 dilution mechanism, and instead suggests an active mechanism, whereby the  
activities of opposing H3K27me3-modifying enzymes at the *Bcl11b* locus set the timing of  
H3K27me3 elimination and gene activation. However, it is unclear what kinds of biophysical  
mechanisms may underlie the timing control at the *Bcl11b* locus.

205 Any mechanism to explain the *Bcl11b* epigenetic timer must account for its observed emergent properties, namely: 1) its ability to robustly set time delays that span multiple cell generations; 2) its stochastic nature; and 3) its tunability by histone modifying enzyme activities. To identify mechanisms that could potentially account for these properties, we analyzed a series of candidate biophysical mechanisms using mathematical modeling. H3K27me3 can bind PRC2 at an

210 allosteric site to stimulate its methyltransferase activity (Margueron et al., 2009), a cooperative mechanism that is thought to maintain repressive H3K27me3 marks across cell division. Therefore, we first considered a simple model, where individual nucleosomes in a one-dimensional array undergo H3K27me3 methylation catalyzed by the presence of nearby methylated nucleosomes, demethylation, as well as H3K27me3 loss due to random nucleosome

215 segregation during DNA replication (Figure 4A; see Mathematical Appendix) (Coleman and Struhl, 2017). Similar models have been shown to support multi-stable histone modification states that are heritable across cell division (Dodd et al., 2007; Zhang et al., 2014). In agreement, we found that single loci could switch from a H3K27 methylated, repressed state to a demethylated state with stochastic delays spanning multiple cell divisions (Figure 4B).

220 However, in our simulations, averaged activation timing was extremely sensitive to H3K27me3 methylation levels in the silent state, with sensitivity coefficients far exceeding those derived from experimental data (Figure 3C, 3E; methylation only model  $s \sim 14$  vs. experimental value  $s \sim 0.3-0.6$ ), such that minor changes ( $\sim 10\%$ ) causing drastic timing changes ( $\sim 300$  fold) (Figure 4C). This extreme sensitivity was ubiquitous across different parameter regimes (data not shown)

225 and was also found in other studies (Dodd et al., 2007; Zhang et al., 2014), indicating that it represents a general feature of such switching models. By analyzing this system using a



transition state theory framework (see Mathematical Appendix and Figure S10A), we found that switching times scale exponentially with methylation or demethylation rates, thus explaining the observed extreme sensitivity. Thus, models that consider histone modification dynamics alone  
230 are inconsistent with the tunable control of activation by H3K27me3-modifying enzymes observed experimentally (Figure 3D, E).

H3K27me3 marks repress gene expression by promoting the association of nucleosomes to form condensed, polymerase-inaccessible assemblies. For instance, H3K27me3 recruits Polycomb Repressive Complex (PRC1), which can self-interact to form compacted, phase-separated  
235 chromatin domains (Plys et al., 2018; Tatavosian et al., 2018). Therefore, we considered a second model, where H3K27me3 levels do not determine gene synthesis rates *per se*, but influence chromatin compaction dynamics to modulate promoter accessibility and gene transcription (Figure 4D). In this methylation-compaction (MC) model, nucleosomes adopt methylated and demethylated states, as before; in addition, they can also bind or dissociate from  
240 a compacted assembly, with methylated nucleosomes binding with stronger affinity compared to demethylated nucleosomes. We do not explicitly model the spatial conformation of the compacted assembly; instead we adopt a chemical kinetics framework, approximating the assembly to be sphere with a minimum nucleus size, following established approaches to describe self-assembly of polymeric assemblies (Howard, 2001; Mitchison, 1992) (see  
245 Mathematical Appendix for details).

From simulations, we found that the system maintained a steady compacted, methylated state for multiple cell divisions before transitioning to uncompact, demethylated state (Figure 4E). As with the methylation-only model, the timing of this all-or-none switch is well described by a first-order stochastic process, with a fixed probability of activation at each individual gene locus  
250 at a given time (Figure 4F). However, in contrast with the methylation-only model, changing the methylation level by varying rates of methylation or demethylation resulted in a much more graded change in gene activation timing (Figure 4C; sensitivity coefficient =  $\sim 0.6$ ), even though it caused marked changes in H3K27me3 levels prior to activation (Figure 4G, H), in concordance with experimental observations (Figure 3D). This tunability was robust over different parameter  
255 ranges (Figure 4C, top right), different degrees of assembly disruption after DNA replication (Figure S2), and different degrees of cooperativity for H3K27me3 methylation (Figure S3). From a transition state theory analysis (see Mathematical Appendix and Figure S10B-C), we found that tunability arises only when interaction affinities between methylated and unmethylated nucleosomes are comparable, such that changes in methylation rates result in small  
260 changes in the height of the energy barrier to activation. Consistent with this idea, H3K27 demethylated nucleosomes still undergo PRC1-mediated compaction, and also aggregate through a variety of other PRC1-independent mechanisms (Larson et al., 2017; Strom et al., 2017). Together, these modeling results clarify how polycomb modifications can give rise to slow, tunable activation delays. First, methylation dynamics need to couple to a separate cooperative  
265 process, such as chromatin compaction. Second, compaction itself must be partially independent from methylation so that even when histone marks are depleted at the gene locus, gene repression and the compacted assembly can still be maintained via other

H3K27me3-independent mechanisms (Francis et al., 2004; Larson et al., 2017; Strome et al., 2014).

## 270 **Transcription factor control of epigenetic timer function**

While the stochastic time constants for *Bcl11b* activation are modulated by histone-modifying enzyme activities (Figures 3-4), our earlier work has shown that they can also be tunably controlled by two transcription factors Gata3 and TCF-1, via a far distal enhancer downstream of the *Bcl11b* gene locus (Kueh et al., 2016; Ng et al., 2018). Here, we determine whether the

275 methylation compaction model described above can also explain tunable timing control by transcription factors in addition to chromatin-modifying enzymes. To do so, we develop an extended version of this model, where a transcription factor binds to the nucleosomal lattice, and destabilizes either the methylation or the compaction states of  $N$  nucleosomes within its local vicinity. Such destabilization could involve a number of candidate mechanisms: for instance,

280 disruption of methylation could occur by direct recruitment of Kdm6a/b demethylases (Estarás et al., 2012; Seenundun et al., 2010; Williams et al., 2014), or through PRC2 eviction by chromatin-remodeling enzymes (Kadoch et al., 2017); on the other hand, disruption of compaction could involve activation of gene or lncRNA transcription (Rinn et al., 2007; Tu et al., 2017), or recruitment of factors that disrupt interactions between nucleosomes (Kraushaar et

285 al., 2013; Talbert and Henikoff, 2017; Zhou et al., 2016).

From simulations, we found that localized disruption of a small number of nucleosomes by transcription factor binding was sufficient to enhance the rate of locus activation. Upon

inhibiting compaction at a single nucleosome, there was a ~2-fold reduction in the average waiting time to H3K27me3 loss and gene activation (Figure S4A). This time decreased further  
290 upon inhibition of compaction at additional nucleosomes. Disrupting H3K27me3 methylation at nucleosomes had a more graded effect, with perturbation of ~10-15 nucleosomes needed for a ~2-fold reduction in the timing of H3K27me3 loss (Figure S4B). We note that this magnitude perturbation is consistent with observed length scales for histone modification clearance around the vicinity of transcription factor binding, as measured by next generation sequencing (Hass et al., 2015; Heinz et al., 2010). Importantly, incorporation of transcription factors into this model  
295 did not affect its key dynamic properties, including its stochastic, all-or-none nature, and its ability to operate over timescales spanning multiple cell generations. Taken together, these results show that the methylation compaction model accounts for the tunability of the *Bcl11b* epigenetic timer by both transcription factors and epigenetic-modifying enzymes.

### 300 **Division independence in epigenetic timing control**

How can we distinguish between the methylation compaction model, as developed above, and passive models, where H3K27me3 marks dilute out passively as a result of DNA replication? As methylation and compaction dynamics are rapid compared to cell division in the methylation-compaction model, epigenetic states at the *Bcl11b* locus recover rapidly after DNA  
305 replication (Figure 4E, S2B-C); this fast recovery, together with the invariance of chromosomal domain size with respect to cell division, could render activation timing independent of cell division speed. In contrast, in a passive dilution model, H3K27me3 loss would require DNA

replication; thus, activation timing would be expected to decrease with faster cell division. To test these predicted behaviors in our models, we varied cell cycle speed in the methylation-compaction model, and measured resultant effects on activation timing. We found that gene activation timing remains largely constant, at ~80 hr, for cell cycle durations ranging from 10-30 hours (Figure 5A right; Figure 5B). This independence between activation timing and cell cycle duration held when we adjusted the model such that DNA replication led to partial disruption of the compacted nucleosomal assembly (Figure S2). In contrast, when H3K27me3 is removed due to passive dilution by DNA replication, activation timing increases with longer cell cycle duration (Figure 5A left, Figure 5B), thus implementing a cell cycle counting mechanism for control of activation. This dependency between activation timing and cell cycle speed remained when H3K27me3 methylation and demethylation rates were non-zero, but slower or comparable to rates of cell division, such that DNA replication remained a significant factor in controlling *Bcl11b* activation (Figure S5). These simulation results provide a testable prediction to distinguish between the methylation-compaction model and passive dilution-based models for epigenetic timing control.

To test if the epigenetic timer controlling *Bcl11b* activation also operates independently of cell division, as predicted for the methylation compaction model, we altered cell division speed in DN2 progenitors by transducing them with the proto-oncogene cMyc, and then used quantitative live-cell imaging to measure resultant effects on *Bcl11b* activation. As expected, cMyc transduction increased the rate of cell division by almost two-fold compared to empty vector controls (from 0.0361 hr<sup>-1</sup> to 0.0635 hr<sup>-1</sup>, see Figure 5C, E, left, Figure S7, Table 1 and

Quantitative and Statistical Analysis). However, despite accelerating cell division, cMyc  
330 transduction did not change *Bcl11b* activation timing, with control and accelerated progenitors  
activating the silent *Bcl11b* allele with indistinguishable dynamics (Figure 5D), and the same  
time constant, as obtained by single exponential fitting (~136 hrs) (Figure 5E, right). Taken  
together, these results show that *Bcl11b* activation is unaffected cell division, consistent with a  
methylation-compaction mechanism for epigenetic timing control.

### 335 **Temporal scalability in networks of epigenetic timers**

We have described an epigenetic timing mechanism, involving all-or-none loss of a repressive  
H3K27me3 domain at a regulatory gene locus, that robustly generates delays in gene activation  
that can span multiple generations. These timing delays can be tunably controlled by both  
transcription factors and epigenetic-modifying enzymes. As H3K27me3 domains broadly cover  
340 lineage-specific gene loci in stem cells, the same epigenetic timing mechanism we have  
described could generate activation delays at other nodes in developmental gene networks;  
furthermore, because the polycomb repressive complexes and H3K27 demethylases have broad  
genome specificity, they could concurrently alter activation timing at multiple network nodes;  
thus, changes in their activity could lead to coordinated, scaled changes in the temporal  
345 schedules set by these networks, as is observed across different mammalian species (Figure 1).

To test this concept that epigenetic timers, when incorporated into regulatory gene networks,  
enable scalable control of network dynamics and developmental schedules, we modeled a

hypothetical network, where an inductive signal activates a linear cascade of regulatory genes, each of which specifies a distinct differentiated cell type (Figure 6A, B, F; see Mathematical Appendix). Each gene in this cascade is activated by an epigenetic timer regulated by both an upstream regulator, and an epigenetic factor acting concurrently on all genes (Figure 6B). This gene network operates in single dividing progenitors, and as each regulatory gene in this cascade turns on, it causes the progenitor to generate the differentiated cell type specified by the activated regulator, as well as an additional copy of itself (Figure 6A). The generation of differentiated cells continues until activation of the last regulatory gene, which causes cells to terminate division and cell expansion. This asymmetric division scheme, together with the linear regulatory cascade for cell type selection, approximates the differentiation strategy in a number of neuronal systems (Kohwi and Doe, 2013; Rossi et al., 2017). As a comparison, we also analyzed a regulatory network with nodes controlled by classical gene regulation functions (Ackers et al., 1982; Bintu et al., 2005; Estrada et al., 2016), where upstream regulators activate a downstream target when their levels reach a certain threshold (Figure 6F, see Mathematical Appendix).

By performing stochastic simulations of epigenetic timer network in single, dividing progenitors within cohorts, we found that this network could generate lineage specification schedules that could be scalably tuned by epigenetic-modifying enzymes. For a chosen set of parameters, individual progenitors turned on regulatory genes in succession upon signal exposure, with cell-to-cell variability in the timing of activation (Figure 6C, top), as expected from the

stochastic nature of the epigenetic timer. Despite the cell-to-cell variability, the different  
activated progenitor populations within an entire cohort arose over time in a highly reproducible  
manner (Figure 6C, bottom), giving rise to a defined schedule for lineage specification, as well  
370 as defined numbers and proportions of differentiated cells (Figure 6D). As expected, the  
coefficient of variation in the numbers of different cells produced per cohort decreased steadily  
with increasing cohort size, indicating that this system can give rise to precise output population  
sizes with sufficient initial progenitor numbers (Figure 6E). Notably, this differentiation  
375 schedule was unaffected by changes in cell division rate (Figure S9A-C), indicating that the  
developmental network as a whole is able to operate independently from cell division. When we  
increased the strength of epigenetic repression by increasing the delay parameter ( $d_E$ ), the order  
of gene activation and the time duration between activation events remained the same; however,  
the entire differentiation schedule dilated in time (Figure 6C, bottom), allowing these progenitors  
380 to generate markedly increased numbers of different output cells, while maintaining relative  
proportions constant (Figure 6D).

In contrast, a network composed of classical gene regulatory nodes could not generate  
temporally scalable schedules. For a chosen set of parameters, this network could generate an  
ordered sequence for gene activation and lineage specification (Figure 6G, *slower vs faster*, and  
385 Figure S9D-F); however, when we attempted to vary activation times and population sizes by  
adjusting a common threshold for gene activation ( $d_T$ ), the dynamics of the network first showed



little change, then diverged abruptly, failing to undergo the full activation sequence above a critical value (Figure 6H). This failure to fully activate caused progenitors to stall at an intermediate state, leading to disproportionate generation of early cell types and an absence of later cell types. Consistent with these observations, prior theoretical analysis had shown that count-up timers built from classical networks do not easily maintain tunable delays over multiple generations, but instead trigger activation events in a ‘now-or-never’ manner (Levine and Elowitz, 2014). Together, these results indicate that regulatory networks composed of epigenetic timers, but not those composed of classical gene regulatory nodes, can generate temporal schedules for differentiation that are robust, yet tunable over extended timescales.

## DISCUSSION

To generate organs and body plans with precise sizes and proportions, developing progenitors must follow defined temporal schedules for cell-type specification. In a range of developmental systems, these temporal schedules are upheld by cell-autonomous timers that can set and flexibly adjust developmental speeds over multiple cell generations. Here, we elucidate the mechanism of an epigenetic timer controlling the activation of *Bcl11b*, a master regulator of T-cell lineage commitment. This epigenetic timer involves the delayed, all-or-none removal of repressive H3K27me3 modifications from the *Bcl11b* locus, a switching event whose timing can be tunably controlled by the activities of opposing H3K27 methylation and demethylation enzymes. By analyzing candidate biophysical models, we find that tunable timing control arises when H3K27 methylation dynamics does not directly mediate switching, but modulates a separate physical

cooperative process that can be explained by chromatin compaction. In contrast to prior models of polycomb-mediated timing control (Coleman and Struhl, 2017; Sun et al., 2014), activation delays set by this mechanism are unaffected by changes in cell cycle duration, a prediction we  
410 verify experimentally. Finally, using mathematical modeling, we find that this epigenetic timer, when incorporated into regulatory nodes of a developmental gene network, enables progenitors to adjust the speed at which they proceed through temporal schedules for lineage specification, and thereby enable them to flexibly change their output progeny numbers, while maintaining their relative proportions (Figure 6D). These results provide a solution to the long-standing  
415 question of how time is set and adjusted in developmental systems, and implicate epigenetic regulators as master controllers of developmental speed and organism size.

From analysis of candidate biophysical mechanisms, we conclude that epigenetic-modifying enzymes can tunably control activation delays only when they modulate a separate cooperative process that gates activation itself (Figure 3, 4). In standard models of epigenetic switching  
420 (Dodd et al., 2007; Zhang et al., 2014), where activation is safeguarded purely by histone methylation/demethylation dynamics, activation time constants are extremely sensitive to small changes in epigenetic-modifying enzyme activity (Figure 4A-C, left); these models cannot explain how activation times can be robustly set and tunably controlled over long timescales, as observed (Figure 3D). It is well established that H3K27me3 modifications repress gene  
425 expression by promoting chromatin compaction; furthermore, emerging evidence indicates that they do so by recruiting protein complexes that self-associate to form phase-separated condensates (Plys et al., 2018; Tatavosian et al., 2018), a physical process that can generate the

cooperativity needed for all-or-none transitions in the methylation-compactation model (Figure 4E). Importantly, for activation times to be tunable in this model, nucleosomes must retain some self-interaction affinity in their demethylated states, such that methylation promotes but is not strictly necessary for nucleosomal association. This prediction is consistent with observations that nucleosomes can associate through a variety of H3K27me-independent mechanisms, involving either H3K27me<sub>3</sub>-independent binding of PRC1 to nucleosomes (Francis et al., 2004), or the self-association of other nucleosome-binding proteins (Larson et al., 2017; Strom et al., 2017). We note that this concept – that modification states of proteins modulate their interaction affinities – is well established in the study of cytoskeletal polymer dynamics (Howard, 2001; Mitchison, 1992; Phillips et al., 2012), but could provide a fresh perspective on understanding the relationship between chromatin modification states and genome structure. Further testing of the methylation-compactation model will require measurements of interaction affinities of nucleosomes in different chemical modification states, as well as identification of the molecular players that mediate these interactions. It will also require direct interrogation of the relationship between these modification states and higher order chromatin structure at individual gene loci, work that will be aided by new methods to simultaneously visualize histone modification states and chromatin folding at single gene loci in single cells (Kundu et al., 2017; Xu et al., 2018).

Our gene network modeling leads us to propose that epigenetic-modifying factors act as master controllers of developmental speed and organism size (Figure 6D-E), a prediction that is supported by evidence from a range of systems. Because of their broad sequence selectivity, epigenetic modifying factors can act concomitantly on multiple nodes in developmental gene

networks (Boyer et al., 2006; Lee et al., 2006); consequently, the developmental schedules set by  
450 these networks could then be uniformly scaled by simply varying the activity of a single  
chromatin regulator acting globally on all network nodes. Consistent with this idea, disruptions  
in polycomb complex activity have been shown to accelerate differentiation across multiple cell  
lineages in different contexts (Akiyama et al., 2016; Endoh et al., 2017; Ezhkova et al., 2009;  
Fujimura et al., 2018; Jacobsen et al., 2017; Zhang et al., 2015). In particular, deletion of the  
455 PRC2 methyltransferase Ezh2 accelerates the temporal schedule for cerebral corticogenesis,  
leading to reduced cortical tissue size while preserving the temporal order of neuronal subtype  
differentiation (Pereira et al., 2010). Over evolution, such changes could have occurred through  
non-coding mutations affecting the expression levels of polycomb components; however,  
because several components of the polycomb repressive complexes, PRC1 and PRC2, have  
460 undergone extensive expansion during vertebrate evolution (Sowpati et al., 2015), it is also  
possible that mutations altering their protein function could have occurred to enable evolutionary  
timing and size variation. While H3K27me3 modifications modulate activation timing in our  
system, the methylation compaction model predicts that it must act with other epigenetic  
regulators for tunable timing control (Figure 4). This model prediction leads us to suggest that  
465 multiple epigenetic systems ultimately work together to dictate the pace of development. The  
repressive mark H3K9me3 also regulates lineage specification (Nicetto et al., 2019), and may  
co-exist with H3K27me3 to establish repression at developmental genes (Boros et al., 2014; de la  
Cruz et al., 2007; Yamamoto et al., 2004). Another intriguing candidate epigenetic regulatory  
factor is HMGA2, a chromatin-binding protein with established roles in control of body size and  
470 growth in vertebrates (Chung et al., 2018; Lamichhaney et al., 2016). HMGA proteins bind

broadly to the genome to modulate chromatin architecture (Ozturk et al., 2014), and could operate broadly on many loci to control developmental speed.

The ability of this epigenetic timer to operate independently from cell division may represent a general property of developmental timing mechanisms (Burton et al., 1999; Gao et al., 1997; 475 Heinzl et al., 2017), and may enable versatile control of organism size and form during evolution. It has long been recognized that cell proliferation rates and developmental timing can vary independently between related species to generate morphological diversity (Alberch et al., 1979). Size and shape changes can occur when timing of individual developmental events vary amid a constant backdrop of cell proliferation; indeed, there are clear examples where mutations 480 affecting *cis*-regulatory elements alter regulatory gene activation timing to drive morphological variation (Frankel et al., 2011; Gérard et al., 1997). Conversely, morphological changes can also occur when proliferation rates vary amid a fixed temporal schedule for development (Trumpp et al., 2001). To understand how evolutionary changes generate morphological innovation in different contexts, it will be important in future studies to separately consider the impact of these 485 changes on timing and growth during development. Hematopoiesis has long served as a convenient paradigm for studying this process. As the total number of hematopoietic stem cells appears to be roughly constant among mammals with vastly different sizes and blood production requirements (Gordon, 2002), progenitors must expand to different degrees during differentiation to generate species-specific blood cell numbers. This may be accomplished by evolutionary 490 changes in cell-autonomous timing mechanisms that allow for more or less progenitor cell expansion prior to stochastic differentiation events. Consistent with this idea, *Bcl11b* activation

and T-cell lineage commitment takes roughly twice as long in human hematopoietic progenitors when compared to those of mice under identical *in vitro* culturing conditions (Dai and Wang, 2009; La Motte-Mohs, 2005).

495 The need for cell-autonomous timing control is perhaps greatest in developmental systems having cells that are either spatially distributed, or interact weakly in space; thus, it is perhaps not surprising that the clearest examples for such control have thus far been found in brain and blood development. However, it is likely that autonomous timing control is also central in systems where spatial patterning controls lineage specification. While patterning mechanisms can scale  
500 cell lineage proportions according to the dimensions of a spatial domain (Ben-Zvi et al., 2011; Inomata, 2017; Rogers and Schier, 2011), they do not control the total domain size itself, which must instead be specified by different mechanisms (Averbukh et al., 2014; Fried and Iber, 2014). Moreover, from the standpoint of an organism, sizes of individual domains must be set proportionally across the entire body plan. Such proportional size scaling would be hard to  
505 achieve through coordination between different domains, but could be readily achieved through the autonomous temporal control, as we have described. For instance, cell-autonomous timers also control limb length (Saiz-Lopez et al., 2015), and may likewise be temporally scaled across different species to generate variations in length (Harrison, 1924). In general, future studies in developmental biology will benefit from closer consideration of the impact of autonomous  
510 temporal control on growth and form in multicellular organisms.

## Acknowledgements

We thank members of Kueh lab for discussions, and also thank Steve Henikoff, Michael Elowitz James Briscoe and Joe Levine for discussions, feedback, and for reading this manuscript. We also thank Steve Henikoff for the generous gift of pA-MNase for CUT&RUN experiments. This  
515 work was funded by an NIH K99/R00 Award (5R00HL119638) and a Tietze Foundation Stem Cell Scientist Award (to H.Y.K.).

## Data availability statement

The sequencing data from CUT&RUN profiling of H3K27me3 modifications will be submitted to the NCBI Gene Expression Omnibus (GEO; <http://www.ncbi.nlm.nih.gov/geo/>) under  
520 accession number GSE134749. The mathematical models will be deposited in the SBML BioModels Database (<https://wwwdev.ebi.ac.uk/biomodels/>). All other data supporting the findings of this paper will be available from the authors upon reasonable request.

## Authorship Contributions

S.N., N.P. and H.Y.K. conceived the study and designed the experiments. S.N. and N.P.  
525 performed all the experiments and analyzed the data. S.N. and H.Y.K. conceived and analyzed the mathematical models. S.N. performed stochastic simulations of the mathematical models. B.I. performed analysis on imaging data. K.N. generated reporter mice for this study. S.N., N.P. and H.Y.K. wrote the manuscript.

## **Methods**

530 **Mouse Generation.** *Bcl11b*<sup>RFP/YFP</sup> mice were generated as described before (Ng et al., 2018). Briefly, *Bcl11b*<sup>YFP/YFP</sup> mice were generated by inserting an IRES-H2B-mCitrine-neo cassette into the 3' UTR of *Bcl11b* and *Bcl11b*<sup>RFP/RFP</sup> mice were generated by inserting an IRES-H2B-mCherry-neo cassette into the same location. Dual allelic *Bcl11b*<sup>RFP/YFP</sup> mice with identical *Bcl11b* alleles except for fluorescent protein reporters were generated by breeding  
535 *Bcl11b*<sup>RFP/RFP</sup> mice to *Bcl11b*<sup>YFP/YFP</sup> mice. Bone marrow derived from F1 *Bcl11b*<sup>RFP/YFP</sup> mice were used for all *in vitro* T cell development assays. All Animals were bred and maintained at the University of Washington. All animal protocols were reviewed and approved by the Institute Animal Care and Use Committee at the University of Washington (Protocol No: 4397-01).

**Cell purification.** To isolate hematopoietic stem and progenitor cells (HSPCs) for *in vitro*  
540 differentiation or CUT&RUN experiments, bone marrow cells were harvested from femurs and tibias of 2 to 4 month-old *Bcl11b*<sup>RFP/YFP</sup> mice. CD117 MicroBeads (Miltenyi Biotec) were used to enrich for HPSCs which were frozen in 90% FBS and 10% DMSO at 10<sup>6</sup> cells/mL. For CUT&RUN experiments, HPSCs were further purified by staining with anti-CD117 APC-eFluor780 (ThermoFisher Scientific) and with biotinylated antibodies against a panel of  
545 bone marrow lineage markers (CD19, CD11b, CD11c, NK.1.1, Ter119, CD3ε, Gr-1 and B220 (BioLegend)). Cells were then washed with HBH (Hank Balanced Salt Solution (HBSS) with 0.1% bovine serum albumin (BSA) and 10mM HEPES) and stained with streptavidin-PerCP/Cy5.5 (BioLegend).



***In vitro* Differentiation of T cell Progenitors.** To generate double-negative (DN) T cells *in vitro*, thawed CD117<sup>+</sup> cells were cultured on OP9-DL1 stromal cell monolayers as described before using standard culture medium [80%  $\alpha$ MEM (Gibco), 20% Fetal Bovine Serum (Sigma-Aldrich), Pen-Strep-Glutamine (Gibco)], grown at 37°C in 5% CO<sub>2</sub> conditions]. All *in vitro* T cell generation cultures were supplemented with 5ng/mL Flt3-L and 5 ng/mL IL-7 (Peprotech), and were sorted after 6 or 7 total days of culture before transducing with retroviral vectors or treating with small molecule inhibitors. DN2 cells were re-cultured in the same conditions following all cell sorting experiments.

**Flow Cytometry and Cell Sorting.** Fluorescence activated cell sorting was used to isolate DN2 cells of interest with the following protocol. Bone marrow derived cell cultures were scraped and incubated in 2.4G2 Fc blocking solution and stained with anti-CD25 APC-eFluor 780 (Clone PC61.5, eBioscience) and with biotinylated antibodies against a panel of lineage markers (CD19, CD11b, CD11c, NK.1.1, Ter119, CD3 $\epsilon$ , Gr-1 and B220 (BioLegend)). Stained cells were washed with HBH (Hank Balanced Salt Solution (HBSS) with 0.1% bovine serum albumin (BSA) and 10mM HEPES and stained with streptavidin-PerCP/Cy5.5 (BioLegend). Stained cells were washed, resuspended in HBH, and filtered through a 40-um nylon mesh for sorting with a BD FACS Aria III (BD Biosciences) with assistance from the University of Washington Pathology Flow Cytometry Core Facility. A benchtop MacsQuant VYB flow cytometer (Miltenyi Biotec) and a benchtop Attune Nxt Flow Cytometer (ThermoFisher Scientific) were used to analyze time course and perturbation experiments and acquired data were analyzed with FlowJo software (Tree Star).

570 **Retroviral construct and transduction.** Overexpression of cMyc in DN2 cells was achieved using cMyc H2B-mCerulean MSCV retroviral vector which was described previously(Kueh et al., 2016). Retroviral mir30-based constructs (a gift from J. Zuber) were used as a backbone for delivering short hairpin RNA (shRNA)(Fellmann et al., 2013). pBAD-mTagBFP2 (a gift from V. Verkhusha, Addgene plasmid #34632) was used to substitute mTagBFP2 for the existing GFP  
575 using PCR cloning with the restriction enzymes NcoI and Sall. The RetroE-shEed retroviral construct was generated by PCR cloning as previously described(Fellmann et al., 2013) with the following PCR template:

```
TGCTGTTGACAGTGAGCGAAGGCATTATAAGAATAATTAATAGTGAAGCCACAGA  
TGTATTAATTATTCTTATAATGCCTCTGCCTACTGCCTCGGA.
```

580 Retroviral particles were generated using the Phoenix-Eco packaging cell line as previously described(Kueh et al., 2016). Viral supernatants were collected at 2 and 3 days after transfection and immediately frozen at -80°C. To infect bone marrow derived T cell progenitors, 33 µg/mL retronectin (Clontech) and 2.67 µg/mL of DL1-extracellular domain fused to human IgG1 Fc protein (a gift from I. Bernstein) were added in a volume of 250 µL per well in 24-well  
585 tissue culture plates (Costar, Corning) and incubated overnight. Viral supernatants were added the next day into coated wells and centrifuged at 2000 rcf for 2 hours at 32°C. Bone marrow derived derived T cell progenitors used for viral transduction were cultured for 6-7 days according to conditions described above, disaggregated, filtered through a 40-µm nylon mesh, and 10<sup>6</sup> cells were transferred onto each retronectin/DL1-coated virus-bound well supplemented  
590 with 5 ng/mL SCF (Peprotech), 5 ng/mL Flt3-L, and 5 ng/mL IL-7.

**CUT&RUN H3K27me3 profiling.** CUT&RUN experiments were carried out as previously described<sup>28</sup> with the following modifications:  $1-2.5 \times 10^5$  cells were isolated by FACS as described in sections above, bound to Concanavalin A coated magnetic beads (Bangs Laboratories), and permeabilized with 0.025% (wt/vol) digitonin. Permeabilized cells were incubated overnight at 4°C with 5ug of anti-H3K27me3 (Active Motif 39156) and then washed before incubating with protein A-MNase fusion protein (a gift from S. Henikoff) for 15 minutes at room temperature. After washing, cells were incubated in  $\text{CaCl}_2$  to induce MNase cleavage activity for 30 minutes at 0°C. The reaction was stopped with 2XSTOP buffer (200 mM NaCl, 20 mM EDTA, 4 mM EGTA, 50 mg/mL RNase A and 40 mg/mL glycogen) with 2pg of yeast spike-in DNA per sample. Histone-DNA complexes were isolated from insoluble nuclear chromatin by centrifugation and DNA was extracted with a NucleoSpin PCR Clean-up kit (Macherey-Nagel). For CUT&RUN quantitative PCR, human Kasumi-1 cell line (ATCC CRL-2724™) were added before binding the cells to Concanavalin A beads for internal standard instead of yeast spike-in DNA.

**CUT&RUN Library Preparation and Sequencing.** Library preparation from CUT&RUN products was completed with KAPA Hyper Prep Kit (KAPA Biosystems) following standard protocol with PCR amplification settings adjusted so that annealing and extension steps are combined into one step at 60°C for 10s. Library products were size selected to be within 200 - 300 bp range using AMPure beads (Agencourt). Libraries were sequenced using an Illumina MiSeq system with paired-end 25 bp sequencing read length and TruSeq primer standard for approximately 5 millions reads per sample.

**CUT&RUN sequencing analysis.** Paired-end sequencing reads were aligned separately to mouse (NCBI37/mm9) and yeast (SacCer\_Apr2011/sacCer3) genomes using Bowtie2 (Langmead and Salzberg, 2012) with the following setting: --local --very-sensitive-local  
615 --no-unal --no-mixed --no-discordant -I 10 -X 700 as suggested for mapping CUT&RUN sequencing data (Skene et al., 2018). The alignment setting was designed to specifically search with high stringency for only appropriately paired reads with the proper orientation. The resulting alignments were converted to BAM files with SAMtools (Li et al., 2009) and then converted to BED files with BEDTools. Reads were sorted and filtered to remove random  
620 chromosomes. BEDTools genomecov was used to generate histograms for the mapped reads using a scaling factor that is the product of the number of spiked-in yeast reads and the number of input cells. The resulting bedGraph files were visualized using the UCSC Genome Browser (Davis et al., 2018; Kent et al.).

**CUT&RUN qPCR.** Extracted DNA from CUT&RUN samples was size selected with Ampure  
625 XP magnetic beads (Beckman Coulter) to remove fragments >800bp. Primers were designed to detect the the mouse *Bcl11b* promoter (F - TCCACCTACCAGACCCCGAA, R - CTTCTTCAAAGTGCTTGGCCTC) and the human *PAX5* promoter (F - CCAGGATGTGCTGCTGTCCCAG, R - CTCCCTGGTGCTGTGCACTGA). PowerUp SYBR Green Master Mix (ThermoFisher Scientific) and CFX96 Real-Time PCR Detection System  
630 (Bio-Rad) were used for quantitative PCR. Since Kasumi-1 cells were used as internal standard, relative enrichment of H3K27me3 at *Bcl11b* was quantified by the  $\Delta\Delta Cq$  method using the human *PAX5* promoter for normalization to account for differences in efficiency and sample loss during processing.

**Cell Preparation for Time-lapse Imaging.** T cell progenitors underwent *in vitro* differentiation  
635 protocol as described above. Cells were then harvested and infected with either a MSCV empty  
vector or cMyc overexpression vector harboring an IRES-H2B-mCerulean reporter cassette.  
16-24 hours later CFP-positive cells were purified by FACS and seeded onto PDMS micromesh  
(250  $\mu$ m hole diameter, Microsurface) mounted on top of 24-well glass bottom plate (MatTeck).  
To prepare the stromal-free differentiation system, the top face of PDMS micromesh was first  
640 blocked by incubating in solution of 130  $\mu$ g/ml BSA while mounted on top of a 24-well plate  
overnight at 4°C. This step prevents subsequent binding of retronectin to the side of the meshm,  
allowing the cells to climb out of the microwells. Blocked micromesh was then transferred to a  
clean 24-well glass bottom plate. The well and mesh constructs were incubated in a solution of  
10  $\mu$ g/ml retronectin and 3  $\mu$ g/ml DL-1 overnight at 4°C. The well was then washed with PBS,  
645 and culture media [80%  $\alpha$ MEM (Gibco), 20% Fetal Bovine Serum (Sigma-Aldrich),  
Pen-Strep-Glutamine (Gibco), 5 ng/ml IL-7 (Clonotech), 5 ng/ml Flt-3 (Clonotech), 50 ng/ml  
mSCF (Clonotech), 50  $\mu$ M beta-mercapto ethanol (Sigma) grown at 37°C in 5% CO<sub>2</sub> conditions]  
was added, and sorted cells were introduced at a concentration of 5-10 cells per microwell.

## **Quantitative and Statistical Analysis**

### 650 **Modeling simulations**

All models were simulated using Gillespie algorithm provided in the Tellurium package in  
Python 2.7(Choi et al., 2018). Plotting of simulation results were done in MATLAB. A detailed  
description of the models can be found in the mathematical appendix.

## Image analysis of time-lapse movies

### 655 *Image segmentation*

Segmentation of progenitor cells were performed in MATLAB (Mathworks, Natick, MA) using custom scripts previously(Kueh et al., 2016; Ng et al., 2018). The segmentation algorithm was performed on CFP fluorescent signal as all transduced cells carried a H2B-CFP reporter cassette. Briefly, images undergo (1) correction by subtraction of uneven background signal stemming  
660 from the bottom of the glass plate or the side of the PDMS microwells (2) gaussian blur followed by pixel value saturation to fix uneven signal intensity within the nucleus of the cell and (3) Laplacian edge detection algorithm to identify the nucleus boundary. Noncell objects were excluded via size and shape limit exclusions, and segmentation parameters were chosen such that number of non-cell objects are <1% of the total segmented cells.

### 665 *Identification of live and dead cell population*

While imaging cMyc or empty vector (EV) transduced cells, we noticed that live and dead cells possess different CFP nuclear signals. Particularly, live cell nuclei have CFP fluorescence constituting a round, smooth oval shape while dead cell nuclei CFP tend to be more granular, containing distinctively small but very bright puncta. To provide unbiased recognition of live and  
670 dead cell, individual segmented cell's CFP image patch underwent Laplacian mask filter to delineate the 'smoothness' of the signal and then threshold-cutoff to identify regions with high CFP signal. Resulting features such as object's areas, perimeter, log(CFP), and puncta numbers are recoded for each cell object. Approximately 100 individual cell image patches (10% of each data set) was then manually annotated as 'live' or 'dead' by trained scientist. The results were

675 then linked to the above feature matrix. Decision tree supervised machine learning algorithm  
implemented by `fitctree` function in MATLAB was then used to generate a model based on the  
annotated live/dead classification and matrix features of the training images (Fig. S6). Finally,  
built-in MATLAB model evaluation functions `resubLoss` and `crossval` were used to validate that  
mis-assignment error is below 15% for all data sets. Such approach offers an objective,  
680 automated method to distinguish between live and dead populations. All scripts for this  
procedure are available upon request.

### **Bcl11b activation rate fitting**

To measure *Bcl11b* activation rate, experimentally, Bcl11b RFP+ cells were cultured on stromal  
cell-free, DL1-coated system (Varnum-Finney et al., 2003), and activation of Bcl11b YFP allele  
685 was monitored in time-lapsed imaging. This stromal-free system enables a greater fold  
enhancement of cell division rate by cMyc transduction and better resolution for imaging as well  
as recapitulating Bcl11b activation and T cell lineage commitment, but supports a lower baseline  
rate of proliferation in unmodified cells compared to the OP9-DL1 system.

For quantitative measurement of this activation rate, first, the YFP and RFP signal intensity of  
690 segmented cells were calculated. Then each cell object underwent live/dead classification  
prediction by trained model as described in the previous section. Only cells that are classified as  
'live' were selected, and their YFP RFP fluorescence 2D histogram is fitted to a two-component  
mixed 2D Gaussian model to obtain the fraction of YFP OFF and ON cells in the population at a  
given time. All the following procedures were implemented in MATLAB. Specifically:

695 To calculate fluorescent value of the Bcl11b YFP and Bcl11b RFP signals, pixel intensity of an  
annulus surrounding the segmented cell were calculated and subtracted from the raw signal  
intensity of the cell interior. This is to eliminate autofluorescence from the bottom of the glass  
plate as well as the PDMS microwells' edge.

To obtain the time evolution of Bcl11b biallelic population fractions from initial Bcl11b  
700 YFP-RFP+ population, cells were first filtered based on their 'live/dead' category, and only  
'live' cells were included in further calculation. We used a modified version of least-squares fit  
of a two-component mixed 2D Gaussian function described by (Ng et al., 2018) to fit the 2D  
histogram of Bcl11b YFP and Bcl11b RFP fluorescence levels. Specifically, let  $y$  and  $r$  be the  
intensity of Bcl11b YFP and Bcl11b RFP fluorescence, respectively, the overall fit,  $F(r, y)$ , is  
705 given by:

$$F(r, y) = \sum_{i=1}^2 f_i(r, y) \quad (1)$$

Each 2D gaussian  $f$  is given by:

$$f_i(r, y) = \frac{N_i}{2\pi\sigma_{r,i}\sigma_{y,i}\sqrt{1-\rho_i^2}} \cdot \exp\left(-\frac{1}{2(1-\rho_i^2 r^2)}\left[\frac{(r-\mu_{r,i})^2}{\sigma_{r,i}^2} + \frac{(y-\mu_{y,i})^2}{\sigma_{r,i}^2} + \frac{2\rho(r-\mu_{r,i})(y-\mu_{r,i})}{\sigma_{r,i}\sigma_{y,i}}\right]\right) \quad (2)$$

Here,  $i=1,2$  correspond to the red mono-allelic and biallelic populations, since all starting cells  
are red mono-allelic, we excluded the other two populations (non-expressing and yellow  
mono-allelic).  $N_i$  is the volume under the gaussian curve when integrated over  $r$  and  $y$  and is the



710 approximation for the number of cells in each population in Bcl11b RFP mono-allelic and biallelic states.

To fit our data to  $F(r, y)$ , we followed a two-step process described previously (Ng et al., 2018):

(1) We fitted Bcl11b YFP/RFP 2D histogram at early time point ( $0 < t < 20$ ) to  $f_1(r, y)$  to obtain the means, standard deviations, and correlation coefficients ( $\mu_{r,1}, \sigma_{r,1}, \mu_{y,1}, \sigma_{y,1}, \rho_1$ ) of the Bcl11b

715 RFP mono-allelic population. At this time point, all cells have inactive Bcl11b YFP allele. (2)

Next, we fitted the 2D histograms of Bcl11b YFP/RFP levels at successive time bins of 20 hours,

fixing the parameter of the first Gaussian  $f_1(r, y)$ , and enabling the parameters for the second

Gaussian  $f_2(r, y)$ , to vary within bounds observed in the fluorescent distributions of Bcl11b

biallelic populations. After fitting, the fraction of biallelic cell at a given time window centered

720 on time  $t$  is given by:

$$f_2^{obs}(t) = \frac{N_2(t)}{N_1(t) + N_2(t)} \quad (3)$$

The confident bounds for  $f_2^{obs}(t)$  is given by:

$$\delta f_i^{obs}(t) = f_i^{obs} \sqrt{\left(\frac{\delta N_i}{N_i}\right)^2 + \frac{\sum_{i=1}^2 \delta N_i^2}{(\sum_{j=1}^2 N_j)^2}} \quad (4)$$

Afterward, the resulting fraction of biallelic cells as a function of time window centered at time  $t$

from the mixed Gaussian fit was then fitted to the probability density function of a first order

process:

$$F_{bi}(t) = 1 - e^{-\lambda t} \quad (5)$$

725 Where  $\lambda$  is the activation rate of Bcl11b from RFP-monoallelic to biallelic state. We chose this function for activation rate fitting since our histone dynamics simulations suggested Bcl11b activation can be estimated as a first order stochastic process (see Fig. 4-5). For this function, fitting was done using MATLAB fit function, and 95% confidence interval for the fit was recorded.

### 730 **Population dynamics model and fitting**

We built a mathematical model to describe the population dynamics of progenitor cells transfected with empty vector (EV) and cMyc. From initial inspection of time-lapse movies (Fig. 5C), progenitors transduced with cMyc appear to expand more quickly than control progenitors, as expected. Faster expansion of cMyc-transduced cells could be due to faster cell cycling or  
735 slower cell death. To disentangle these two effects, we quantified numbers of both live and dead cells over time (Fig. S7) and fit these data to population dynamics models to obtain division and death rates:

In general, the model includes a population of live cell ( $X$ ) with a birthrate  $k_b$  and a death rate  $k_d$  to generate the dead cell population ( $Y$ ). This population in turn has a clearance rate  $\delta$  denoting  
740 the process in which CFP level degrades and the dead cells become undetected.

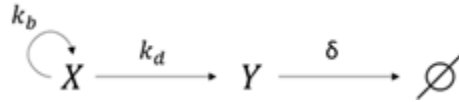

Live population at a given time  $T$  can be described as a simple first order process:

$$X(T) = X_o e^{(k_b - k_d)T} = X_o e^{KT} \quad (6)$$

Where  $K = k_b - k_d$  and  $X_o$  is the initial number of live cells at the start of imaging. On the other hand, we adopt a stepwise approach to model the dead cell population:

$$Y(T) = Y_o P(T) + \sum_{t=0}^T X(t) \cdot k_d \cdot P(T - t) \quad (7)$$

Here  $Y_o$  is initial number of live cells at the start of imaging and  $P(\tau)$  is an exponential decay  
745 function describing the fraction of CFP-positive dead population remaining after a period time  
from its first appearance. Since dead cell's fluorescent signal is dim, segmentation of these cells  
tends to 'fickle' before completely disappear. In this model, whenever a cell starts to die, its  
probability of being detected decreases as per function  $P(T)$ , and the number of dead cells at a  
given time  $T$  is the sum of all the still-detected dead cells generated since the start of imaging up  
750 until  $T$ . This discrete approach allows us to fit cell death data to a relatively simpler function  
compared to a more sophisticated two-component system of ODE model without sacrificing the  
complexity of dead cell detection phenomenon.

We determined  $P(\tau)$  empirically for EV and cMyc population separately by manually following 30 different dead cells and record the time period in which it was detected and undetected until complete disappearance. Then we plotted how many dead cells out of 30 were detected after a given time has elapsed. An exponential function decay function was used to fit this ‘fraction detected’ curve and to estimate value for clearance rate (Fig. S7B):

$$P(\tau) = e^{-\delta\tau} \quad (8)$$

Here,  $P(\tau)$  is the probability of a given dead cell to be detected under the CFP fluorescent channel after period of time since its initial death.  $\delta$  is the clearance rate of this process.

To fit imaging data to equation (6). We classified segmented cell object as live or dead using trained machine learning model as described in ‘Image analysis of time-lapse movies’ section. Number of live cells as a function of time was fitted to equation (6) using MATLAB fit function to estimate , and 95% confidence interval for the fit was recorded.

To fit imaging data to equation (7), we performed fine scanning of candidate  $k_{d,i}$  values from the set  $K_D = \{0, 0.0005, 0.001, 0.0015, \dots, 0.0495, 0.05\}$ . For each  $k_{d,i}$ , a predicted  $Y_{p,i}(T)$  curve was generated based on equation (7) where  $T = t_1, t_2, t_3, \dots$  with  $t_i$  being the time point at which experimental measurement took place.  $Y_{p,i}(T)$  is then compared to the experimentally observed dead cell number  $Y_{exp}(T)$  using sum square error method:

$$sse_i = \sum_{t=t_1, t_2, t_3, \dots} [Y_{exp}(t) - Y_{p,i}(t)]^2 \quad (9)$$

The best fit  $k_d$  value is chosen to be the  $k_{d,i}$  value whose  $sse_i$  is the smallest.

770 In order to calculate the confidence bound of the fit, we utilized nonlinear regression method by first calculating the residue of the model's predicted values  $Y_p(t_i)$ :

$$dY_{t_i} = Y_{exp}(t_i) - Y_p(t_i) \quad (10)$$

Then we calculate to the Jacobian of the model function to estimate the covariance at each time point and is given by:

$$J_{t_i} = \frac{\partial Y_p(t_i)}{\partial k_d} \quad (11)$$

775 These inputs were used to estimate 95% confidence interval using MATLAB 'Nonlinear regression parameter confidence intervals' function `nlparci`.

Summary of results from fitting of data to activation rate and population models are tabulated in Table 1.

## References

- 780 Ackers, G.K., Johnson, A.D., and Shea, M.A. (1982). Quantitative model for gene regulation by  
lambda phage repressor. *Proc. Natl. Acad. Sci. U. S. A.* *79*, 1129–1133.
- Akiyama, T., Wakabayashi, S., Soma, A., Sato, S., Nakatake, Y., Oda, M., Murakami, M.,  
Sakota, M., Chikazawa-Nohtomi, N., Ko, S.B.H., et al. (2016). Transient ectopic  
expression of the histone demethylase JMJD3 accelerates the differentiation of human  
pluripotent stem cells. *Dev. Camb. Engl.* *143*, 3674–3685.
- 785 Alberch, P., Gould, S.J., Oster, G.F., and Wake, D.B. (1979). Size and Shape in Ontogeny and  
Phylogeny. *Paleobiology* *5*, 296–317.
- Aloia, L., Di Stefano, B., and Di Croce, L. (2013). Polycomb complexes in stem cells and  
embryonic development. *Development* *140*, 2525–2534.
- Alon, U. (2007). Network motifs: theory and experimental approaches. *Nat. Rev. Genet.* *8*,  
790 450–461.
- van den Aamele, J., Tiberi, L., Vanderhaeghen, P., and Espuny-Camacho, I. (2014). Thinking out  
of the dish: what to learn about cortical development using pluripotent stem cells. *Trends  
Neurosci.* *37*, 334–342.
- Angel, A., Song, J., Dean, C., and Howard, M. (2011). A Polycomb-based switch underlying  
795 quantitative epigenetic memory. *Nature* *476*, 105–108.
- Averbukh, I., Ben-Zvi, D., Mishra, S., and Barkai, N. (2014). Scaling morphogen gradients  
during tissue growth by a cell division rule. *Dev. Camb. Engl.* *141*, 2150–2156.
- Barry, C., Schmitz, M.T., Jiang, P., Schwartz, M.P., Duffin, B.M., Swanson, S., Bacher, R., Bolin,  
J.M., Elwell, A.L., McIntosh, B.E., et al. (2017). Species-specific developmental timing is  
800 maintained by pluripotent stem cells ex utero. *Dev. Biol.* *423*, 101–110.
- Ben-Zvi, D., Shilo, B.-Z., and Barkai, N. (2011). Scaling of morphogen gradients. *Curr. Opin.  
Genet. Dev.* *21*, 704–710.
- Berry, S., Dean, C., and Howard, M. (2017). Slow Chromatin Dynamics Allow Polycomb Target  
Genes to Filter Fluctuations in Transcription Factor Activity. *Cell Syst.* *4*, 445-457.e8.
- 805 Bintu, L., Buchler, N.E., Garcia, H.G., Gerland, U., Hwa, T., Kondev, J., and Phillips, R. (2005).  
Transcriptional regulation by the numbers: models. *Curr. Opin. Genet. Dev.* *15*, 116–124.
- Bintu, L., Yong, J., Antebi, Y.E., McCue, K., Kazuki, Y., Uno, N., Oshimura, M., and Elowitz,  
M.B. (2016). Dynamics of epigenetic regulation at the single-cell level. *Science* *351*,  
720–724.
- 810 Bolouri, H., and Davidson, E.H. (2002). Modeling transcriptional regulatory networks.  
*BioEssays News Rev. Mol. Cell. Dev. Biol.* *24*, 1118–1129.
- Bonner, J. (1965). *Size and cycle: an essay on the structure of biology* (Princeton University  
Press).
- Boros, J., Arnoult, N., Stroobant, V., Collet, J.-F., and Decottignies, A. (2014). Polycomb  
815 repressive complex 2 and H3K27me3 cooperate with H3K9 methylation to maintain  
heterochromatin protein 1 $\alpha$  at chromatin. *Mol. Cell. Biol.* *34*, 3662–3674.
- Boyer, L.A., Plath, K., Zeitlinger, J., Brambrink, T., Medeiros, L.A., Lee, T.I., Levine, S.S.,  
Wernig, M., Tajonar, A., Ray, M.K., et al. (2006). Polycomb complexes repress  
developmental regulators in murine embryonic stem cells. *Nature* *441*, 349–353.
- 820 Briscoe, J., and Small, S. (2015). Morphogen rules: design principles of gradient-mediated

- embryo patterning. *Dev. Camb. Engl.* *142*, 3996–4009.
- Burton, P.B.J., Raff, M.C., Kerr, P., Yacoub, M.H., and Barton, P.J.R. (1999). An Intrinsic Timer That Controls Cell-Cycle Withdrawal in Cultured Cardiac Myocytes. *Dev. Biol.* *216*, 659–670.
- 825 Calder, W. (1984). *Size, function, and life history* (Cambridge: Harvard University Press).
- Choi, K., Medley, J.K., König, M., Stocking, K., Smith, L., Gu, S., and Sauro, H.M. (2018). Tellurium: An extensible python-based modeling environment for systems and synthetic biology. *Biosystems* *171*, 74–79.
- 830 Chung, J., Zhang, X., Collins, B., Sper, R.B., Gleason, K., Simpson, S., Koh, S., Sommer, J., Flowers, W.L., Petters, R.M., et al. (2018). High mobility group A2 (HMGA2) deficiency in pigs leads to dwarfism, abnormal fetal resource allocation, and cryptorchidism. *Proc. Natl. Acad. Sci.* *115*, 5420–5425.
- Coleman, R.T., and Struhl, G. (2017). Causal role for inheritance of H3K27me3 in maintaining the OFF state of a *Drosophila* HOX gene. *Science* *356*, eaai8236.
- 835 de la Cruz, C.C., Kirmizis, A., Simon, M.D., Isono, K., Koseki, H., and Panning, B. (2007). The polycomb group protein SUZ12 regulates histone H3 lysine 9 methylation and HP1 alpha distribution. *Chromosome Res. Int. J. Mol. Supramol. Evol. Asp. Chromosome Biol.* *15*, 299–314.
- Dai, B., and Wang, P. (2009). In Vitro Differentiation of Adult Bone Marrow Progenitors into Antigen-Specific CD4 Helper T Cells Using Engineered Stromal Cells Expressing a Notch Ligand and a Major Histocompatibility Complex Class II Protein. *Stem Cells Dev.* *18*, 235–245.
- 840 Davidson, E.H. (2010). Emerging properties of animal gene regulatory networks. *Nature* *468*, 911–920.
- 845 Davis, C.A., Hitz, B.C., Sloan, C.A., Chan, E.T., Davidson, J.M., Gabdank, I., Hilton, J.A., Jain, K., Baymuradov, U.K., Narayanan, A.K., et al. (2018). The Encyclopedia of DNA elements (ENCODE): data portal update. *Nucleic Acids Res.* *46*, D794–D801.
- De Beer, G. (1940). *Embryos and ancestors* (The Clarendon Press).
- Dodd, I.B., Micheelsen, M.A., Sneppen, K., and Thon, G. (2007). Theoretical analysis of epigenetic cell memory by nucleosome modification. *Cell* *129*, 813–822.
- 850 Ebisuya, M., and Briscoe, J. (2018). What does time mean in development? *Development* *145*, dev164368.
- Eiraku, M., Watanabe, K., Matsuo-Takasaki, M., Kawada, M., Yonemura, S., Matsumura, M., Wataya, T., Nishiyama, A., Muguruma, K., and Sasai, Y. (2008). Self-organized formation of polarized cortical tissues from ESCs and its active manipulation by extrinsic signals. *Cell Stem Cell* *3*, 519–532.
- 855 Endoh, M., Endo, T.A., Shinga, J., Hayashi, K., Farcas, A., Ma, K.-W., Ito, S., Sharif, J., Endoh, T., Onaga, N., et al. (2017). PCGF6-PRC1 suppresses premature differentiation of mouse embryonic stem cells by regulating germ cell-related genes. *ELife* *6*.
- 860 Espuny-Camacho, I., Michelsen, K.A., Gall, D., Linaro, D., Hasche, A., Bonnefont, J., Bali, C., Orduz, D., Bilheu, A., Herpoel, A., et al. (2013). Pyramidal neurons derived from human pluripotent stem cells integrate efficiently into mouse brain circuits in vivo. *Neuron* *77*, 440–456.
- 865 Estarás, C., Akizu, N., García, A., Beltrán, S., de la Cruz, X., and Martínez-Balbás, M.A. (2012). Genome-wide analysis reveals that Smad3 and JMJD3 HDM co-activate the neural

- developmental program. *Dev. Camb. Engl.* *139*, 2681–2691.
- Estrada, J., Wong, F., DePace, A., and Gunawardena, J. (2016). Information Integration and Energy Expenditure in Gene Regulation. *Cell* *166*, 234–244.
- 870 Ezhkova, E., Pasolli, H.A., Parker, J.S., Stokes, N., Su, I.-hsin, Hannon, G., Tarakhovsky, A., and Fuchs, E. (2009). Ezh2 orchestrates gene expression for the stepwise differentiation of tissue-specific stem cells. *Cell* *136*, 1122–1135.
- Fellmann, C., Hoffmann, T., Sridhar, V., Hopfgartner, B., Muhar, M., Roth, M., Lai, D.Y., Barbosa, I.A.M., Kwon, J.S., Guan, Y., et al. (2013). An Optimized microRNA Backbone for Effective Single-Copy RNAi. *Cell Rep.* *5*, 1704–1713.
- 875 Francis, N.J., Kingston, R.E., and Woodcock, C.L. (2004). Chromatin compaction by a polycomb group protein complex. *Science* *306*, 1574–1577.
- Frankel, N., Erezyilmaz, D.F., McGregor, A.P., Wang, S., Payre, F., and Stern, D.L. (2011). Morphological evolution caused by many subtle-effect substitutions in regulatory DNA. *Nature* *474*, 598–603.
- 880 Fried, P., and Iber, D. (2014). Dynamic scaling of morphogen gradients on growing domains. *Nat. Commun.* *5*, 5077.
- Fujimura, N., Kuzelova, A., Ebert, A., Strnad, H., Lachova, J., Machon, O., Busslinger, M., and Kozmik, Z. (2018). Polycomb repression complex 2 is required for the maintenance of retinal progenitor cells and balanced retinal differentiation. *Dev. Biol.* *433*, 47–60.
- 885 Gao, F.-B., Durand, B., and Raff, M. (1997). Oligodendrocyte precursor cells count time but not cell divisions before differentiation. *Curr. Biol.* *7*, 152–155.
- García-Ojeda, M.E., Klein Wolterink, R.G.J., Lemaître, F., Richard-Le Goff, O., Hasan, M., Hendriks, R.W., Cumano, A., and Di Santo, J.P. (2013). GATA-3 promotes T-cell specification by repressing B-cell potential in pro-T cells in mice. *Blood* *121*, 1749–1759.
- 890 Gaspard, N., Bouschet, T., Hourez, R., Dimidschstein, J., Naeije, G., van den Ameele, J., Espuny-Camacho, I., Herpoel, A., Passante, L., Schiffmann, S.N., et al. (2008). An intrinsic mechanism of corticogenesis from embryonic stem cells. *Nature* *455*, 351–357.
- Georgescu, C., Longabaugh, W.J.R., Scripture-Adams, D.D., David-Fung, E.-S., Yui, M. a, Zarnegar, M. a, Bolouri, H., and Rothenberg, E.V. (2008). A gene regulatory network armature for T lymphocyte specification. *Proc. Natl. Acad. Sci. U. S. A.* *105*, 20100–20105.
- 895 Gérard, M., Zákány, J., and Duboule, D. (1997). Interspecies Exchange of a Hoxd Enhancer in Vivo Induces Premature Transcription and Anterior Shift of the Sacrum. *Dev. Biol.* *190*, 32–40.
- 900 Germar, K., Dose, M., Konstantinou, T., Zhang, J., Wang, H., Lobry, C., Arnett, K.L., Blacklow, S.C., Aifantis, I., Aster, J.C., et al. (2011). T-cell factor 1 is a gatekeeper for T-cell specification in response to Notch signaling. *Proc. Natl. Acad. Sci. U. S. A.* *108*, 20060–20065.
- Gordon, M.Y. (2002). Of mice and men ... and elephants. *Blood* *100*, 4679–4679.
- 905 Gould, S.J. (1977). *Ontogeny and Phylogeny* (Cambridge: Harvard University Press).
- Haeckel, E. (1866). *Generelle Morphologie der Organismen* (Berlin: Remier).
- Harrison, R.G. (1924). Some Unexpected Results of the Heteroplastic Transplantation of Limbs. *Proc. Natl. Acad. Sci. U. S. A.* *10*, 69–74.
- 910 Hass, M.R., Liow, H.-H., Chen, X., Sharma, A., Inoue, Y.U., Inoue, T., Reeb, A., Martens, A., Fulbright, M., Raju, S., et al. (2015). SpDamID: Marking DNA Bound by Protein



- Complexes Identifies Notch-Dimer Responsive Enhancers. *Mol. Cell* *59*, 685–697.
- 915 Heinz, S., Benner, C., Spann, N., Bertolino, E., Lin, Y.C., Laslo, P., Cheng, J.X., Murre, C., Singh, H., and Glass, C.K. (2010). Simple combinations of lineage-determining transcription factors prime cis-regulatory elements required for macrophage and B cell identities. *Mol. Cell* *38*, 576–589.
- Heinzel, S., Binh Giang, T., Kan, A., Marchingo, J.M., Lye, B.K., Corcoran, L.M., and Hodgkin, P.D. (2017). A Myc-dependent division timer complements a cell-death timer to regulate T cell and B cell responses. *Nat. Immunol.* *18*, 96–103.
- 920 Hosogane, M., Funayama, R., Shirota, M., and Nakayama, K. (2016). Lack of Transcription Triggers H3K27me3 Accumulation in the Gene Body. *Cell Rep.* *16*, 696–706.
- Hosokawa, H., Romero-Wolf, M., Yui, M.A., Ungerback, J., Quiloan, M.L.G., Matsumoto, M., Nakayama, K.I., Tanaka, T., and Rothenberg, E.V. (2018). Bcl11b sets pro-T cell fate by site-specific cofactor recruitment and by repressing Id2 and Zbtb16. *Nat. Immunol.* *19*, 1427–1440.
- 925 Howard, J. (2001). *Mechanics of Motor Proteins and the Cytoskeleton* (Sunderland, Mass: Sinauer Associates is an imprint of Oxford University Press).
- Huxley, J. (1932). *Problems of Relative Growth* (L. MacVeagh, The Dial Press).
- Huxley, J. (1942). *Evolution: the modern synthesis* (London: Allen and Unwin).
- 930 Ikawa, T., Hirose, S., Masuda, K., Kakugawa, K., Satoh, R., Shibano-Satoh, A., Kominami, R., Katsura, Y., and Kawamoto, H. (2010). An essential developmental checkpoint for production of the T cell lineage. *Science* *329*, 93–96.
- Inomata, H. (2017). Scaling of pattern formations and morphogen gradients. *Dev. Growth Differ.* *59*, 41–51.
- 935 Jacobsen, J.A., Woodard, J., Mandel, M., Clark, M.R., Bartom, E.T., Sigvardsson, M., and Kee, B.L. (2017). EZH2 regulates the developmental timing of effectors of the pre-antigen receptor checkpoints. *J. Immunol. Baltim. Md 1950* *198*, 4682–4691.
- Kadoch, C., Williams, R.T., Calarco, J.P., Miller, E.L., Weber, C.M., Braun, S.M.G., Pulice, J.L., Chory, E.J., and Crabtree, G.R. (2017). Dynamics of BAF-Polycomb complex opposition on heterochromatin in normal and oncogenic states. *Nat. Genet.* *49*, 213–222.
- 940 Kaikkonen, M.U., Spann, N.J., Heinz, S., Romanoski, C.E., Allison, K.A., Stender, J.D., Chun, H.B., Tough, D.F., Prinjha, R.K., Benner, C., et al. (2013). Remodeling of the Enhancer Landscape during Macrophage Activation Is Coupled to Enhancer Transcription. *Mol. Cell* *51*, 310–325.
- 945 Kaneko, S., Son, J., Bonasio, R., Shen, S.S., and Reinberg, D. (2014). Nascent RNA interaction keeps PRC2 activity poised and in check. *Genes Dev.* *28*, 1983–1988.
- Kent, W.J., Sugnet, C.W., Furey, T.S., Roskin, K.M., Pringle, T.H., Zahler, A.M., and Haussler, D. *The Human Genome Browser at UCSC.* 12.
- Khan, M., Vaes, E., and Mombaerts, P. (2011). Regulation of the probability of mouse odorant receptor gene choice. *Cell* *147*, 907–921.
- 950 Kohwi, M., and Doe, C.Q. (2013). Temporal Fate Specification and Neural Progenitor Competence During Development. *Nat. Rev. Neurosci.* *14*, 823–838.
- Kraushaar, D.C., Jin, W., Maunakea, A., Abraham, B., Ha, M., and Zhao, K. (2013). Genome-wide incorporation dynamics reveal distinct categories of turnover for the histone variant H3.3. *Genome Biol.* *14*, R121.
- 955 Kueh, H.Y., Yui, M.A., Ng, K.K.H., Pease, S.S., Zhang, J.A., Damle, S.S., Freedman, G., Siu, S.,

- Bernstein, I.D., Elowitz, M.B., et al. (2016). Asynchronous combinatorial activation of four regulatory factors activates Bcl11b for T cell commitment. *Nat. Immunol.* *17*, 956–965.
- Kundu, S., Ji, F., Sunwoo, H., Jain, G., Lee, J.T., Sadreyev, R.I., Dekker, J., and Kingston, R.E. (2017). Polycomb Repressive Complex 1 Generates Discrete Compacted Domains that Change during Differentiation. *Mol. Cell* *65*, 432–446.e5.
- 960 La Motte-Mohs, R.N. (2005). Induction of T-cell development from human cord blood hematopoietic stem cells by Delta-like 1 in vitro. *Blood* *105*, 1431–1439.
- Lamichhaney, S., Han, F., Berglund, J., Wang, C., Almen, M.S., Webster, M.T., Grant, B.R., Grant, P.R., and Andersson, L. (2016). A beak size locus in Darwins finches facilitated character displacement during a drought. *Science* *352*, 470–474.
- 965 Langmead, B., and Salzberg, S.L. (2012). Fast gapped-read alignment with Bowtie 2. *Nat. Methods* *9*, 357–359.
- Larson, A.G., Elnatan, D., Keenen, M.M., Trnka, M.J., Johnston, J.B., Burlingame, A.L., Agard, D.A., Redding, S., and Narlikar, G.J. (2017). Liquid droplet formation by HP1 $\alpha$  suggests a role for phase separation in heterochromatin. *Nature* *547*, 236–240.
- 970 Lee, T.I., Jenner, R.G., Boyer, L.A., Guenther, M.G., Levine, S.S., Kumar, R.M., Chevalier, B., Johnstone, S.E., Cole, M.F., Isono, K., et al. (2006). Control of Developmental Regulators by Polycomb in Human Embryonic Stem Cells. *Cell* *125*, 301–313.
- Levine, J.H., and Elowitz, M.B. (2014). Polyphasic feedback enables tunable cellular timers. *Curr. Biol.* *24*, R994–R995.
- 975 Li, H., Handsaker, B., Wysoker, A., Fennell, T., Ruan, J., Homer, N., Marth, G., Abecasis, G., Durbin, R., and 1000 Genome Project Data Processing Subgroup (2009). The Sequence Alignment/Map format and SAMtools. *Bioinformatics* *25*, 2078–2079.
- Li, L., Leid, M., and Rothenberg, E.V. (2010a). An early T cell lineage commitment checkpoint dependent on the transcription factor Bcl11b. *Science* *329*, 89–93.
- 980 Li, P., Burke, S., Wang, J., Chen, X., Ortiz, M., Lee, S.-C., Lu, D., Campos, L., Goulding, D., Ng, B.L., et al. (2010b). Reprogramming of T cells to natural killer-like cells upon Bcl11b deletion. *Science* *329*, 85–89.
- Manesso, E., Chickarmane, V., Kueh, H.Y., Rothenberg, E.V., and Peterson, C. (2013). Computational modelling of T-cell formation kinetics: output regulated by initial proliferation-linked deferral of developmental competence. *J. R. Soc. Interface* *10*, 20120774.
- 985 Margueron, R., Justin, N., Ohno, K., Sharpe, M.L., Son, J., Drury, W.J., Voigt, P., Martin, S.R., Taylor, W.R., De Marco, V., et al. (2009). Role of the polycomb protein EED in the propagation of repressive histone marks. *Nature* *461*, 762–767.
- 990 Mayran, A., Khetchoumian, K., Hariri, F., Pastinen, T., Gauthier, Y., Balsalobre, A., and Drouin, J. (2018). Pioneer factor Pax7 deploys a stable enhancer repertoire for specification of cell fate. *Nat. Genet.* *50*, 259–269.
- Medina, K.L., Singh, H., and Pongubala, J.M. (2005). Contingent gene regulatory networks and B cell fate specification. *Immunity* *22*, 494–495.
- 995 Mitchison, T.J. (1992). Compare and contrast actin filaments and microtubules. *Mol. Biol. Cell* *3*, 1309–1315.
- Ng, K.K., Yui, M.A., Mehta, A., Siu, S., Irwin, B., Pease, S., Hirose, S., Elowitz, M.B., Rothenberg, E.V., and Kueh, H.Y. (2018). A stochastic epigenetic switch controls the dynamics of T-cell lineage commitment. *ELife* *7*.
- 1000

- Nicetto, D., Donahue, G., Jain, T., Peng, T., Sidoli, S., Sheng, L., Montavon, T., Becker, J.S., Grindheim, J.M., Blahnik, K., et al. (2019). H3K9me3-heterochromatin loss at protein-coding genes enables developmental lineage specification. *Science* 363, 294–297.
- 1005 Otani, T., Marchetto, M.C., Gage, F.H., Simons, B.D., and Livesey, F.J. (2016). 2D and 3D Stem Cell Models of Primate Cortical Development Identify Species-Specific Differences in Progenitor Behavior Contributing to Brain Size. *Cell Stem Cell* 18, 467–480.
- Ozturk, N., Singh, I., Mehta, A., Braun, T., and Barreto, G. (2014). HMGA proteins as modulators of chromatin structure during transcriptional activation. *Front. Cell Dev. Biol.* 2.
- 1010 Pereira, J.D., Sansom, S.N., Smith, J., Dobenecker, M.-W., Tarakhovsky, A., and Livesey, F.J. (2010). Ezh2, the histone methyltransferase of PRC2, regulates the balance between self-renewal and differentiation in the cerebral cortex. *Proc. Natl. Acad. Sci.* 107, 15957–15962.
- 1015 Phillips, R., Kondev, J., Theriot, J., and Garcia, H. (2012). *Physical Biology of the Cell* (London : New York, NY: Garland Science).
- Plys, A.J., Davis, C.P., Kim, J., Rizki, G., Keenen, M.M., Marr, S.K., and Kingston, R.E. (2018). Phase separation and nucleosome compaction are governed by the same domain of Polycomb Repressive Complex 1. *BioRxiv* 467316.
- 1020 Porritt, H.E., Gordon, K., and Petrie, H.T. (2003). Kinetics of steady-state differentiation and mapping of intrathymic-signaling environments by stem cell transplantation in nonirradiated mice. *J. Exp. Med.* 198, 957–962.
- Rank, G., Prestel, M., and Paro, R. (2002). Transcription through Intergenic Chromosomal Memory Elements of the Drosophila Bithorax Complex Correlates with an Epigenetic Switch. *Mol. Cell. Biol.* 22, 8026–8034.
- 1025 Riising, E.M., Comet, I., Leblanc, B., Wu, X., Johansen, J.V., and Helin, K. (2014). Gene Silencing Triggers Polycomb Repressive Complex 2 Recruitment to CpG Islands Genome Wide. *Mol. Cell* 55, 347–360.
- 1030 Rinn, J.L., Kertesz, M., Wang, J.K., Squazzo, S.L., Xu, X., Brugmann, S.A., Goodnough, L.H., Helms, J.A., Farnham, P.J., Segal, E., et al. (2007). Functional Demarcation of Active and Silent Chromatin Domains in Human HOX Loci by Noncoding RNAs. *Cell* 129, 1311–1323.
- Rogers, K.W., and Schier, A.F. (2011). Morphogen Gradients: From Generation to Interpretation. *Annu. Rev. Cell Dev. Biol.* 27, 377–407.
- 1035 Rosello-Diez, A., Arques, C.G., Delgado, I., Giovinazzo, G., and Torres, M. (2014). Diffusible signals and epigenetic timing cooperate in late proximo-distal limb patterning. *Development* 141, 1534–1543.
- Rossi, A.M., Fernandes, V.M., and Desplan, C. (2017). Timing temporal transitions during brain development. *Curr. Opin. Neurobiol.* 42, 84–92.
- 1040 Saiz-Lopez, P., Chinnaiya, K., Campa, V.M., Delgado, I., Ros, M.A., and Towers, M. (2015). An intrinsic timer specifies distal structures of the vertebrate limb. *Nat. Commun.* 6, 8108.
- Seenundun, S., Rampalli, S., Liu, Q.-C., Aziz, A., Pali, C., Hong, S., Blais, A., Brand, M., Ge, K., and Dilworth, F.J. (2010). UTX mediates demethylation of H3K27me3 at muscle-specific genes during myogenesis. *EMBO J.* 29, 1401–1411.
- 1045 Simeonov, D.R., Gowen, B.G., Boontanart, M., Roth, T.L., Gagnon, J.D., Mumbach, M.R., Satpathy, A.T., Lee, Y., Bray, N.L., Chan, A.Y., et al. (2017). Discovery of

- stimulation-responsive immune enhancers with CRISPR activation. *Nature* 549, 111–115.
- Skene, P.J., Henikoff, J.G., and Henikoff, S. (2018). Targeted in situ genome-wide profiling with high efficiency for low cell numbers. *Nat. Protoc.* 13, 1006–1019.
- 1050 Sowpati, D.T., Ramamoorthy, S., and Mishra, R.K. (2015). Expansion of the polycomb system and evolution of complexity. *Mech. Dev.* 138, 97–112.
- Strom, A.R., Emelyanov, A.V., Mir, M., Fyodorov, D.V., Darzacq, X., and Karpen, G.H. (2017). Phase separation drives heterochromatin domain formation. *Nature* 547, 241–245.
- Strome, S., Kelly, W.G., Ercan, S., and Lieb, J.D. (2014). Regulation of the X chromosomes in *Caenorhabditis elegans*. *Cold Spring Harb. Perspect. Biol.* 6.
- 1055 Sun, B., Looi, L.-S., Guo, S., He, Z., Gan, E.-S., Huang, J., Xu, Y., Wee, W.-Y., and Ito, T. (2014). Timing Mechanism Dependent on Cell Division Is Invoked by Polycomb Eviction in Plant Stem Cells. *Science* 343, 1248559–1248559.
- Talbert, P.B., and Henikoff, S. (2017). Histone variants on the move: substrates for chromatin dynamics. *Nat. Rev. Mol. Cell Biol.* 18, 115–126.
- 1060 Tatavosian, R., Kent, S., Brown, K., Yao, T., Duc, H.N., Huynh, T.N., Zhen, C.Y., Ma, B., Wang, H., and Ren, X. (2018). Nuclear condensates of the Polycomb protein chromobox 2 (CBX2) assemble through phase separation. *J. Biol. Chem.* jbc.RA118.006620.
- Trumpp, A., Refaeli, Y., Oskarsson, T., Gasser, S., Murphy, M., Martin, G.R., and Bishop, J.M. (2001). c-Myc regulates mammalian body size by controlling cell number but not cell size. *Nature* 414, 768.
- 1065 Tu, S., Yuan, G.-C., and Shao, Z. (2017). The PRC2-binding long non-coding RNAs in human and mouse genomes are associated with predictive sequence features. *Sci. Rep.* 7.
- Varnum-Finney, B., Brashem-Stein, C., and Bernstein, I.D. (2003). Combined effects of Notch signaling and cytokines induce a multiple log increase in precursors with lymphoid and myeloid reconstituting ability. *Blood* 101, 1784–1789.
- 1070 Walters, M.C., Fiering, S., Eidemiller, J., Magis, W., Groudine, M., and Martin, D.I. (1995). Enhancers increase the probability but not the level of gene expression. *Proc. Natl. Acad. Sci. U. S. A.* 92, 7125–7129.
- Weber, B.N., Chi, A.W.-S., Chavez, A., Yashiro-Ohtani, Y., Yang, Q., Shestova, O., and Bhandoola, A. (2011). A critical role for TCF-1 in T-lineage specification and differentiation. *Nature* 476, 63–68.
- 1075 Weintraub, H. (1988). Formation of stable transcription complexes as assayed by analysis of individual templates. *Proc. Natl. Acad. Sci. U. S. A.* 85, 5819–5823.
- Williams, K., Christensen, J., Rappsilber, J., Nielsen, A.L., Johansen, J.V., and Helin, K. (2014). The histone lysine demethylase JMJD3/KDM6B is recruited to p53 bound promoters and enhancer elements in a p53 dependent manner. *PloS One* 9, e96545.
- 1080 Xiao, J., and Wagner, D. (2015). Polycomb repression in the regulation of growth and development in *Arabidopsis*. *Curr. Opin. Plant Biol.* 23, 15–24.
- Xu, J., Ma, H., Jin, J., Uttam, S., Fu, R., Huang, Y., and Liu, Y. (2018). Super-Resolution Imaging of Higher-Order Chromatin Structures at Different Epigenomic States in Single Mammalian Cells. *Cell Rep.* 24, 873–882.
- 1085 Yamamoto, K., Sonoda, M., Inokuchi, J., Shirasawa, S., and Sasazuki, T. (2004). Polycomb group suppressor of zeste 12 links heterochromatin protein 1alpha and enhancer of zeste 2. *J. Biol. Chem.* 279, 401–406.
- 1090 Zhang, H., Tian, X.-J., Mukhopadhyay, A., Kim, K.S., and Xing, J. (2014). Statistical Mechanics

Model for the Dynamics of Collective Epigenetic Histone Modification. *Phys. Rev. Lett.* *112*, 068101.

Zhang, J., Taylor, R.J., La Torre, A., Wilken, M.S., Cox, K.E., Reh, T.A., and Vetter, M.L. (2015). Ezh2 maintains retinal progenitor proliferation, transcriptional integrity, and the timing of late differentiation. *Dev. Biol.* *403*, 128–138.

1095

Zhang, J.A., Mortazavi, A., Williams, B.A., Wold, B.J., and Rothenberg, E.V. (2012). Dynamic transformations of genome-wide epigenetic marking and transcriptional control establish T cell identity. *Cell* *149*, 467–482.

Zhou, C.Y., Johnson, S.L., Gamarra, N.I., and Narlikar, G.J. (2016). Mechanisms of ATP-Dependent Chromatin Remodeling Motors. *Annu. Rev. Biophys.* *45*, 153–181.

1100

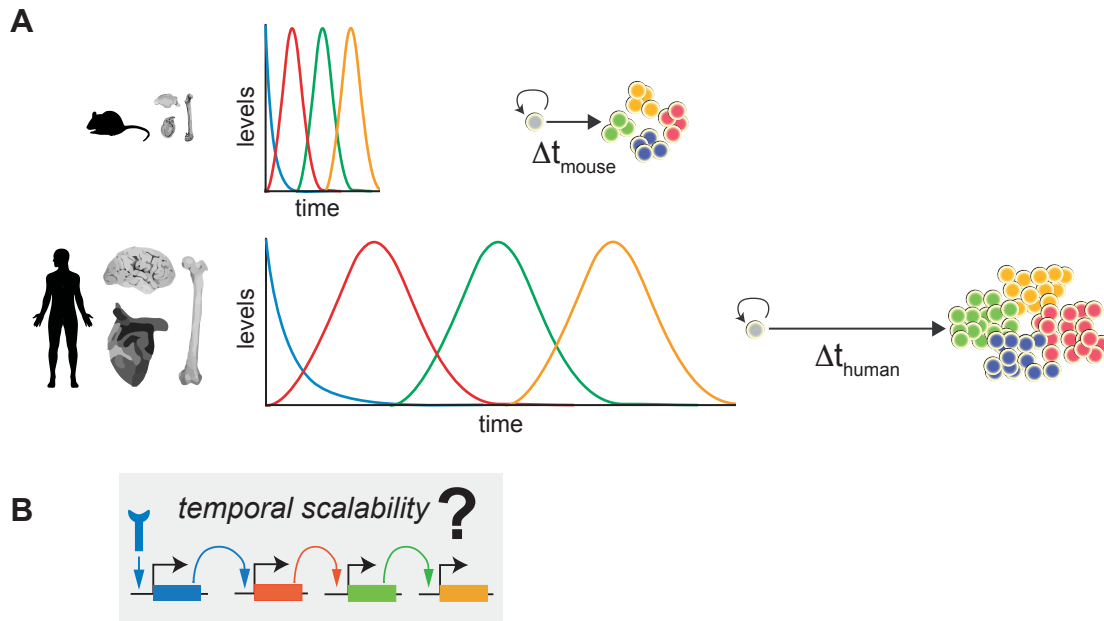

**Figure 1. Temporal scalability in development.** (A) In different developmental systems, dividing progenitors maintain cell-autonomous schedules for lineage specification. These temporal schedules can be compressed or extended in time for proportional scaling of organ and organism size. (B) Developmental schedules are executed by conserved developmental gene networks; however, it remains unclear what molecular processes allow gene networks to set autonomous, temporally-scalable schedules over developmental timescales.



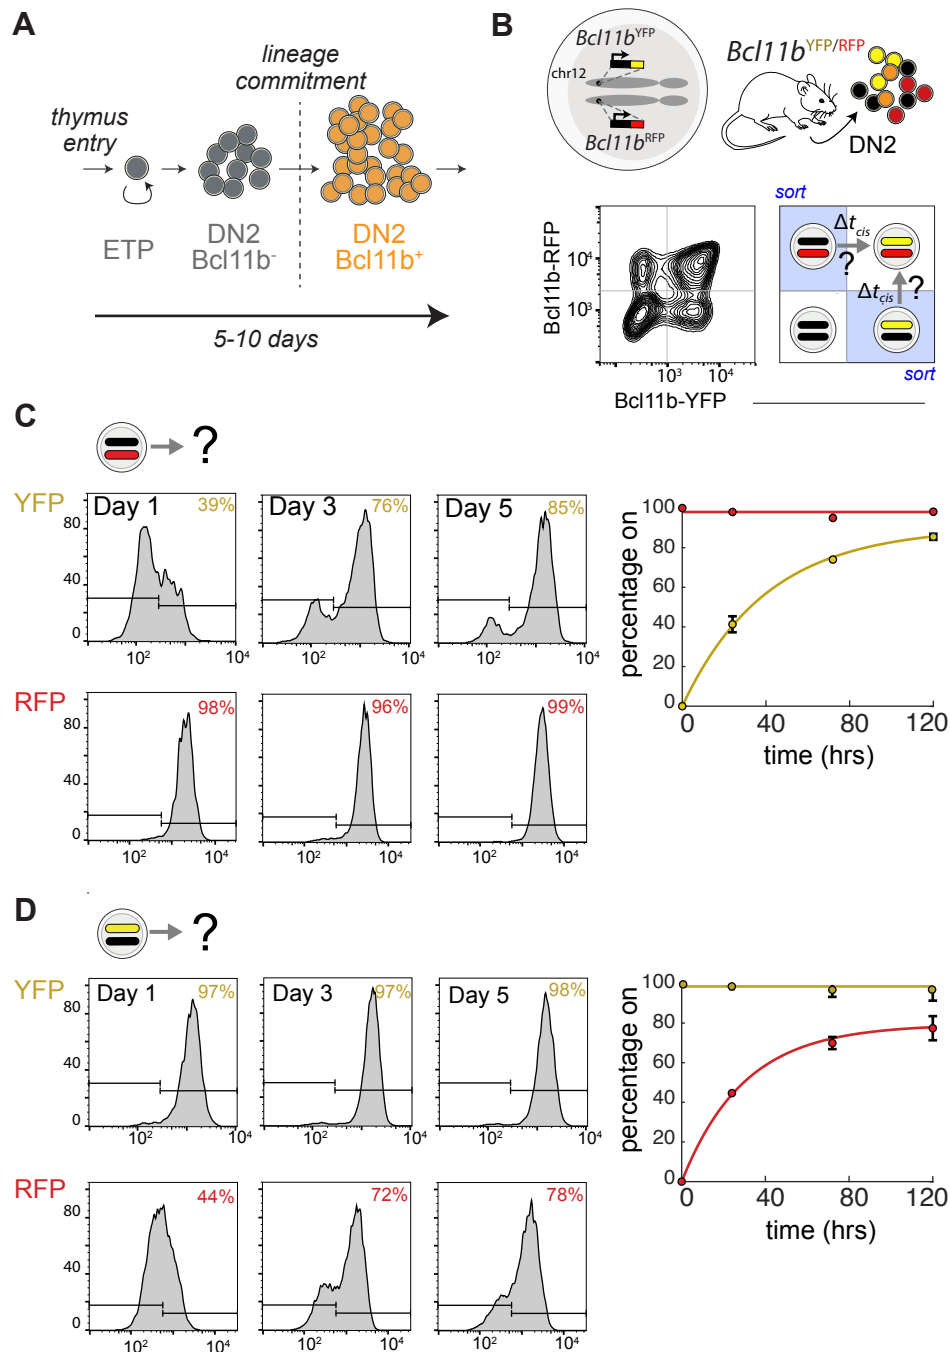

**Figure 2. An epigenetic timing mechanism, acting on the *Bcl11b* locus, delays gene activation and T-cell lineage commitment.** (A) Schematic of early T-cell development. Early cell expansion is enabled by delayed activation of the T-cell commitment regulator *Bcl11b*. (B) Dual-allelic *Bcl11b* reporter mouse (top), along with flow cytometry plot showing levels of the two *Bcl11b* reporters in bone-marrow derived DN2 progenitors (bottom left), along with strategy to purify monoallelic progenitors for live analysis of epigenetic timing step. (C-D) DN2 monoallelic progenitors were purified by cell sorting, cultured on OP9-DL1 with 5 ng/mL IL-7 and Flt3L, and analyzed by flow cytometry. Mean values and 95% confidence intervals are plotted for  $n = 3$  different batches of bone marrow. Curves represent fits to the equation  $f(x) = F(1 - e^{-kt})$  ( $k = 0.025 \text{ hrs}^{-1} \pm 0.005$  for *Bcl11b*-YFP and  $k = 0.034 \text{ hrs}^{-1} \pm 0.009$  for *Bcl11b*-RFP).

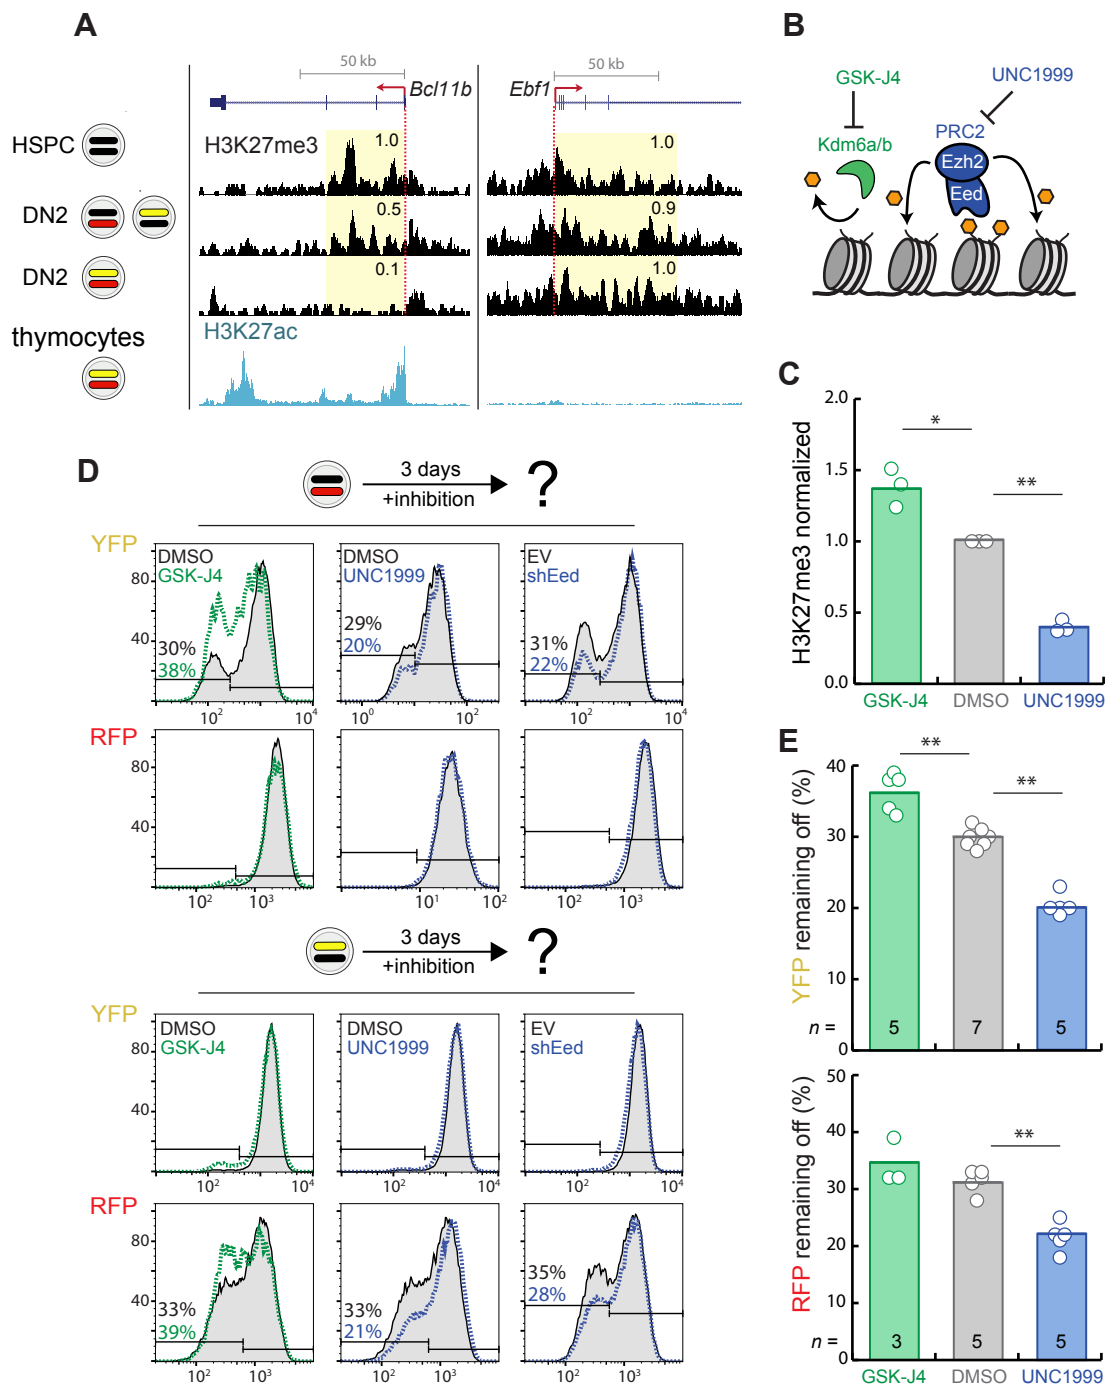



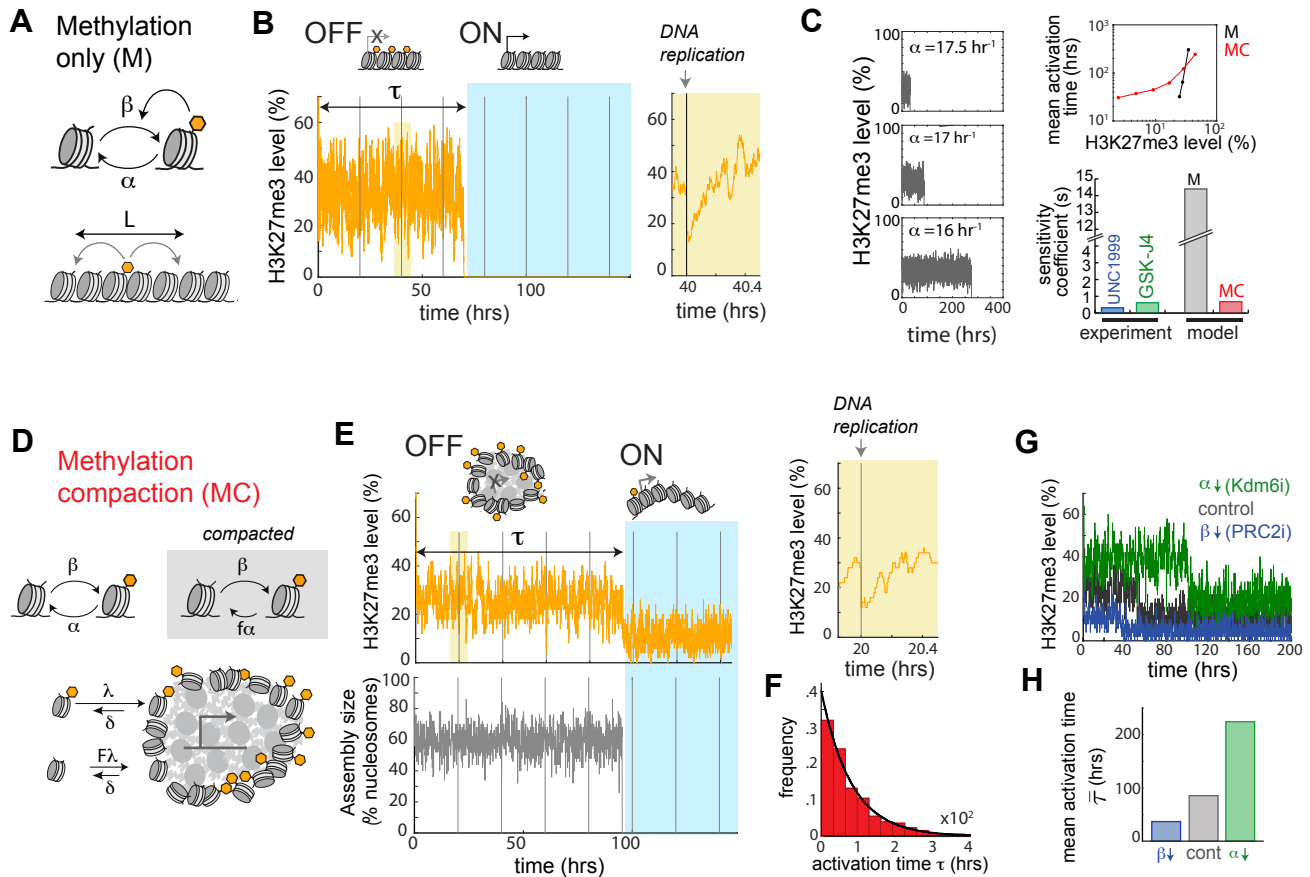

**Figure 4: A methylation-compaction mechanism enables robust, tunable epigenetic timing control.** Two candidate biophysical mechanisms for the epigenetic timer were analyzed using mathematical modeling, a methylation-only mechanism (A-C), and a methylation-compaction mechanism (D-H). (A) Methylation only model, along with (B) fraction H3K27me3 nucleosomes over time from a stochastic simulation, with inset showing H3K27me3 loss and recovery after DNA replication. (C) Sensitivity analysis of the methylation-only model (gray) and methylation-compaction model (red), showing H3K27me3 time traces for indicated parameters in the methylation model (left), mean activation time versus averaged H3K27me3 levels (top right), and averaged sensitivity coefficient  $s = d\ln(y)/d\ln(x)$  for the relationship between these two variables, both in models and experiments (blue, green, calculated from Fig. 3C,E). (D) The methylation-compaction model, along with (E) time traces of the fraction of H3K27me3-marked nucleosomes (top left), and the fraction of nucleosomes in a compacted assembly (bottom left). Inset (top right) shows H3K27me3 recovery after cell division. (F) Histogram shows distribution of activation times, along with fit to the exponential function  $y = e^{-kt}$  with  $k = 0.012 \text{ hr}^{-1}$ . H3K27me3 time traces (top) (G) and bar charts (H) show impact of simulated PRC2 or Kdm6 inhibition on initial H3K27me3 levels and mean activation times. Results represent average of 200 simulations.

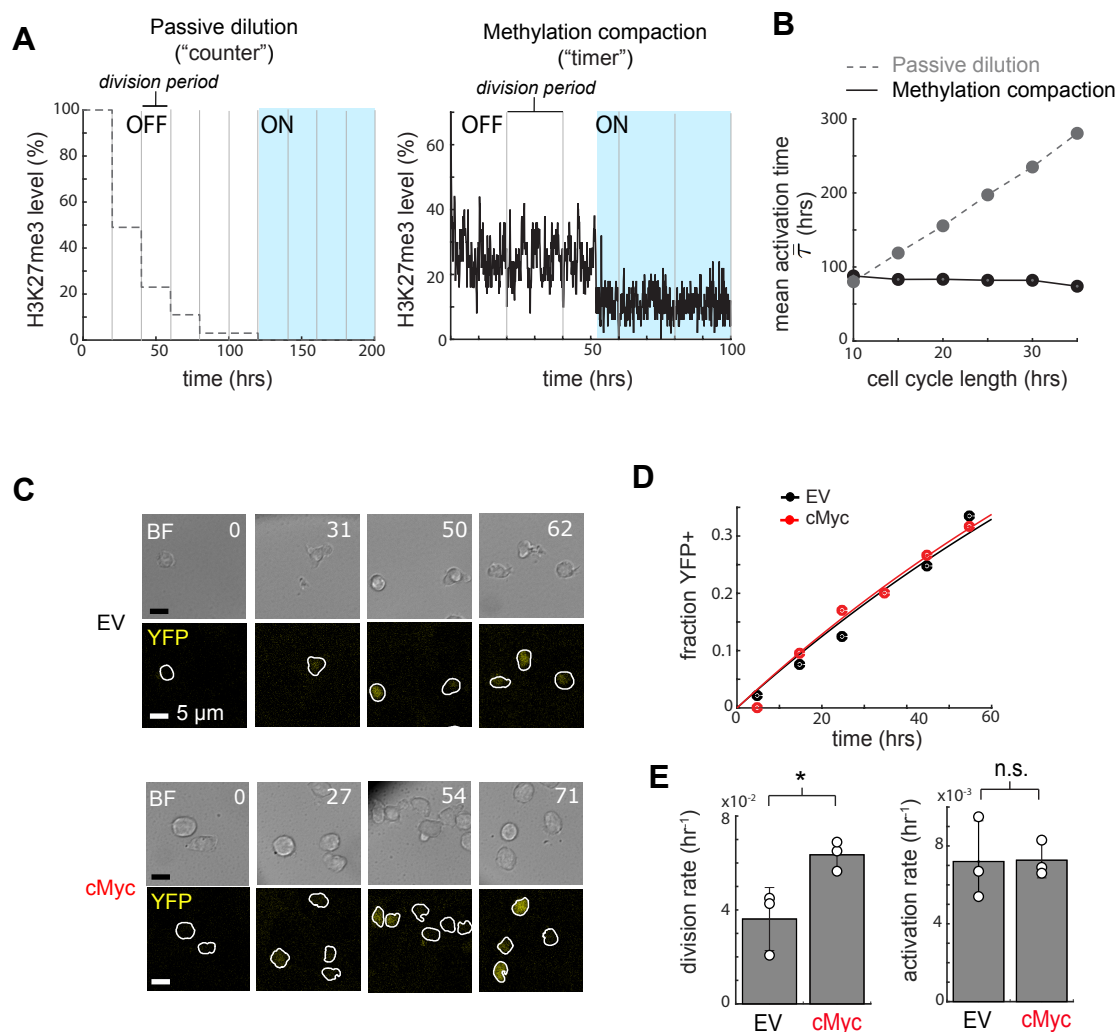

**Figure 5. The *Bcl11b* epigenetic timer operates independently of cell-division, as predicted from the methylation-compaction model.** (A) H3K27me3 time traces for a passive model, where H3K27me3 marks are diluted with each cell division (left), and the methylation-compaction model for gene activation (right). In the passive model, gene activation occurs after the total levels of repressive marks fall below a threshold. (B) Simulated average switching time as a function of cell cycle length. (C-E) *Bcl11b*<sup>YFP-/RFP+</sup> DN2 progenitors transduced with either empty vector (EV) or cMyc CFP-expressing retrovirus were sorted, cultured on DL1-coated plates, and subject to continuous timelapse imaging. (C) Timelapse images show brightfield (BF, gray) and YFP (yellow) fluorescence of progenitors. White boundaries show automated cell segmentation. Numbers show elapsed time in hours, and scale bar = 5  $\mu$ m. (D) Fraction of YFP+ cells over time. (E) Mean and standard deviation of cell division and switching rates ( $n = 3$  independent experiments, \* $p < 0.025$ , n.s. not significant, one-tailed t test). Each data point is measured from one independent imaging experiment.

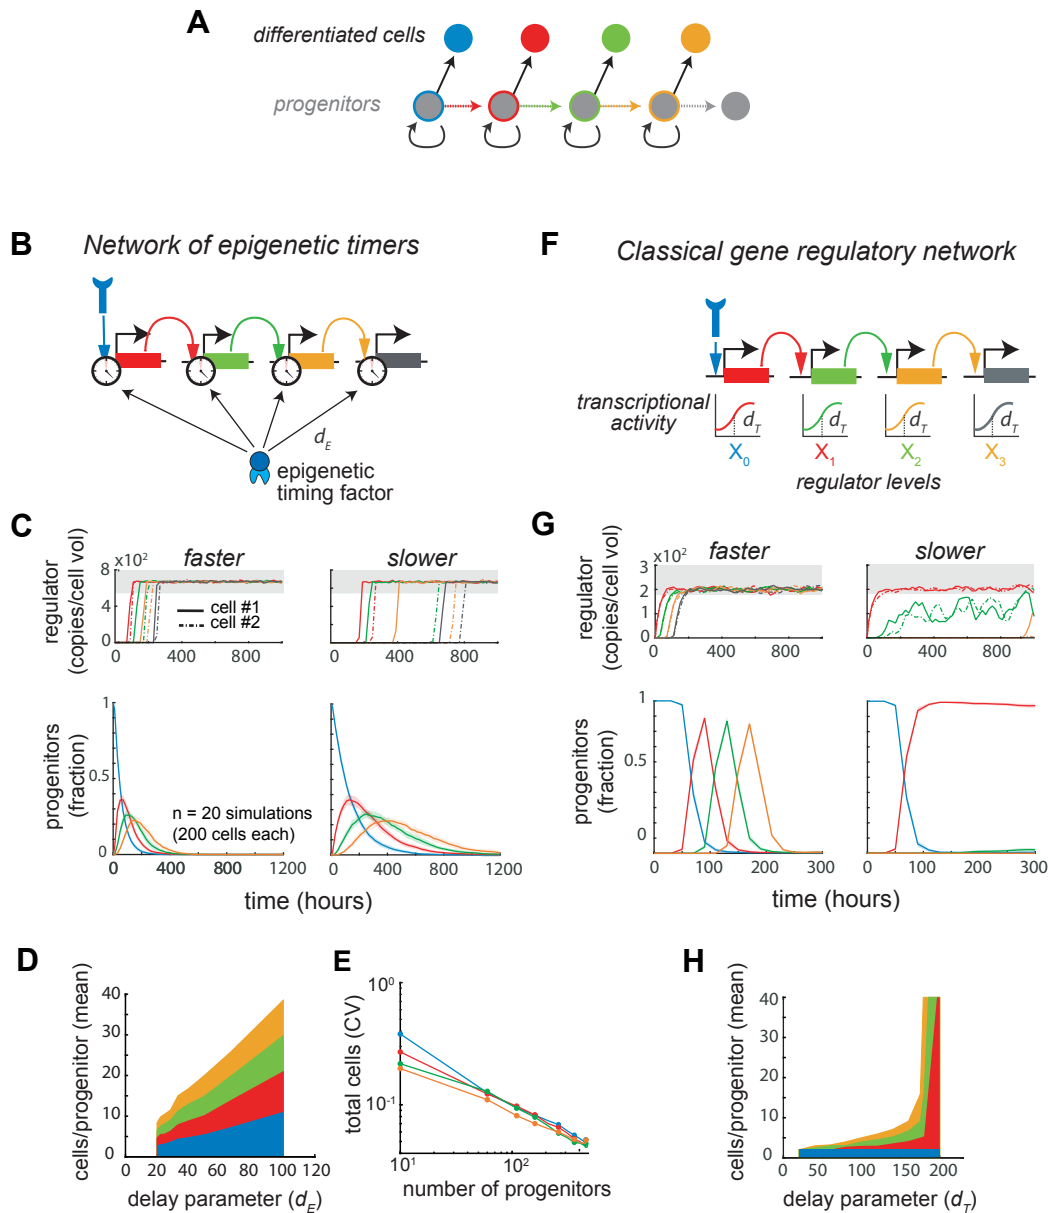

**Figure 6. Developmental gene networks composed of epigenetic timers generate scalable temporal schedules for flexible population size control.** Two gene regulatory network cascades were compared using mathematical modeling, one built from epigenetic timers (B-E), and another built from classical gene regulation functions (F-H) (See Mathematical Appendix for model description). Both regulatory networks control a common differentiation scheme (A), where progenitors that have activated a given lineage-specifying gene generate a corresponding differentiated progeny through asymmetric cell division (Rossi et al., 2017). (B) In the epigenetic timer network, where every lineage-specifying gene in the cascade is regulated by an epigenetic timing factor, whose activity is set by a common delay parameter  $d_E$ . In the classical network (F), there is a common threshold for transcription factor activation, set by the delay parameter  $d_T$ . (C,G, top) Stochastic simulations of the respective networks for two individual cells (solid and dashed lines) with faster ( $d_E = 25$  or  $d_T = 150$ ) and slower ( $d_E = 66.66$  or  $d_T = 200$ ) delays. Gray shaded area indicates the threshold regulator concentration required for differentiated cell production (C,G, bottom). Mean fraction of cells at each stage of the gene network with faster and slower delays. Shaded regions indicate standard deviation from 20 simulations of 200 progenitors. Fraction of cells that have turned on the last gene in the cascade is not shown. (D and H) Mean numbers of different cell types generated in the two networks, plotted as a function of the delay parameter. Proportional scaling of output cell numbers arises in the epigenetic timing network (D), but not in the classical network (H). (E) Coefficient of variation for total numbers of differentiated cells produced, plotted as a function of initial progenitor number.

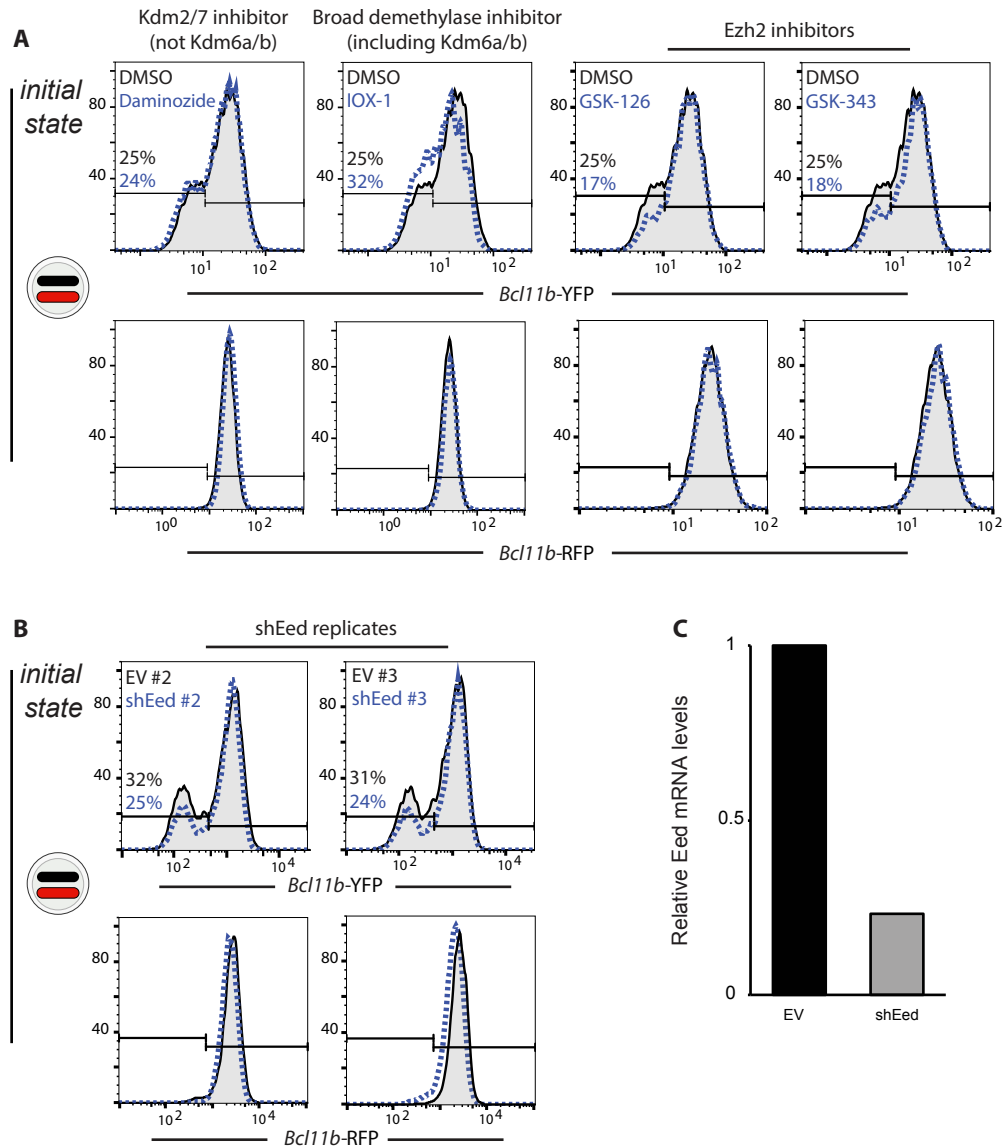

**Supplementary Figure 1. H3K27me-modifying enzymes modulate *Bcl11b* activation timing.** (A) DN2 *Bcl11b*-RFP monoallelic cells were sorted, recultured in the presence of different small molecule inhibitors and analyzed by flow cytometry 3 days later. Slowed activation rate is unique to Kdm6a/b inhibitors: IOX-1 (above) or GSK-J4 (Figure 3D). Similar accelerated activation rate was observed for all three Ezh2 inhibitors: GSK-126, GSK-343 (above), and UNC1999 (Figure 3D). (B) Two additional experimental replicates for Eed knockdown show similar accelerated activation rate (Figure 3D). (C) Relative mRNA levels of Eed were measured by qPCR.

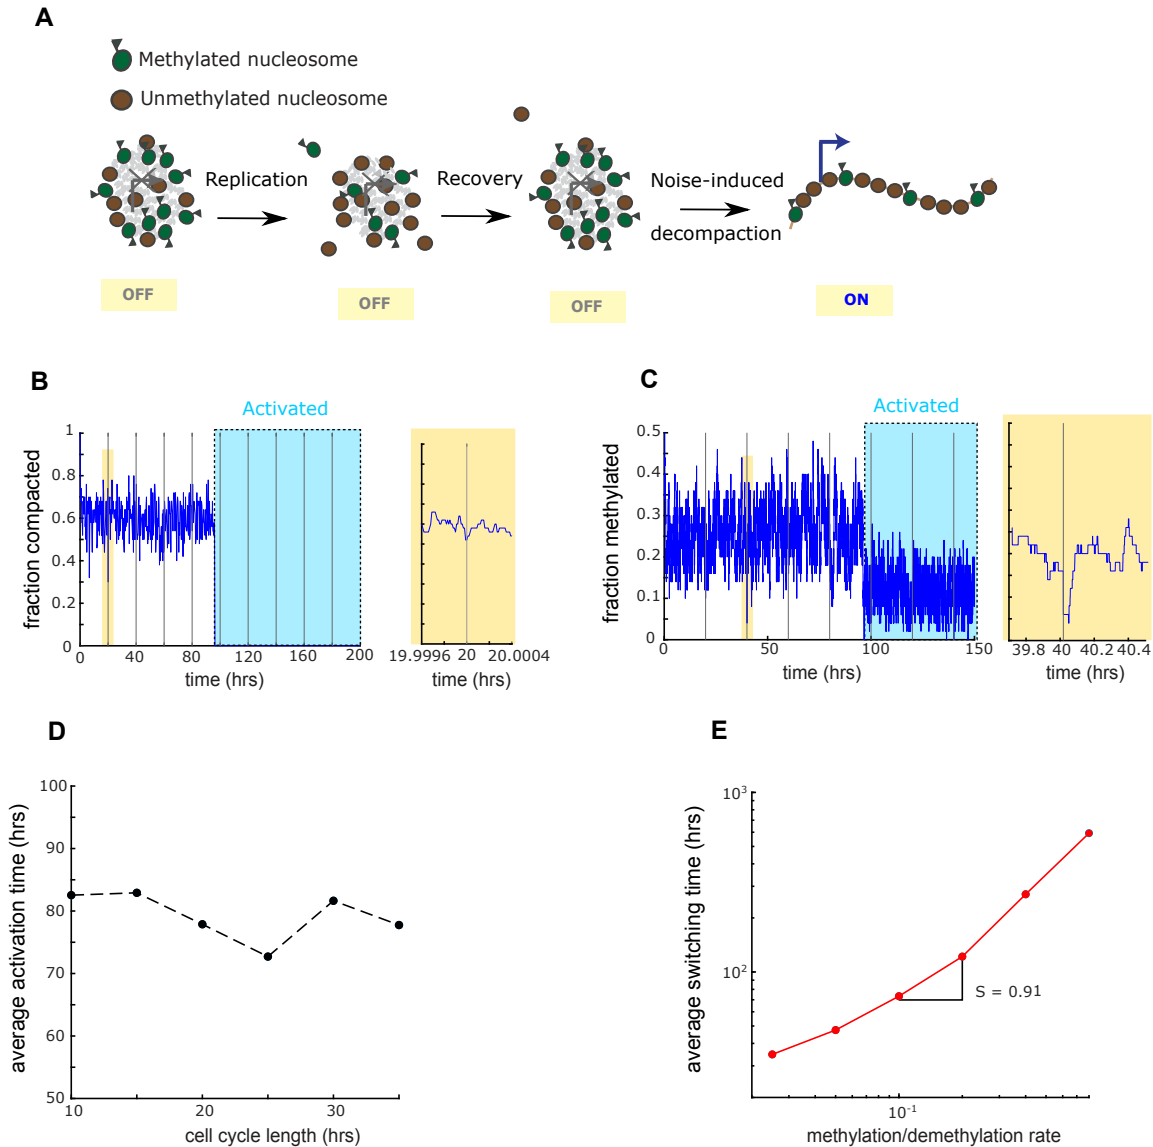

**Supplemental Figure 2. Perturbations to the compacted state by DNA replication does not affect tunability or division-independence in the methylation compaction model.** (A) Modified methylation compaction model where every cell division leads to 50% reduction in methylation state and 10% reduction in compaction state. (B-C) Model's compaction and methylation state as a function of time. Zoomed in first replication event. (D) Average switching time of the system as a function of cell cycle length. (E) Model systems' average switching times as a function of methylation and demethylation rate ratio. Tunability coefficient  $S$  ( $\Delta \log Y / \Delta \log X$ ) for each plot was calculated by taking the slope of the linear fit  $y = ax + b$  for the methylation model data set.

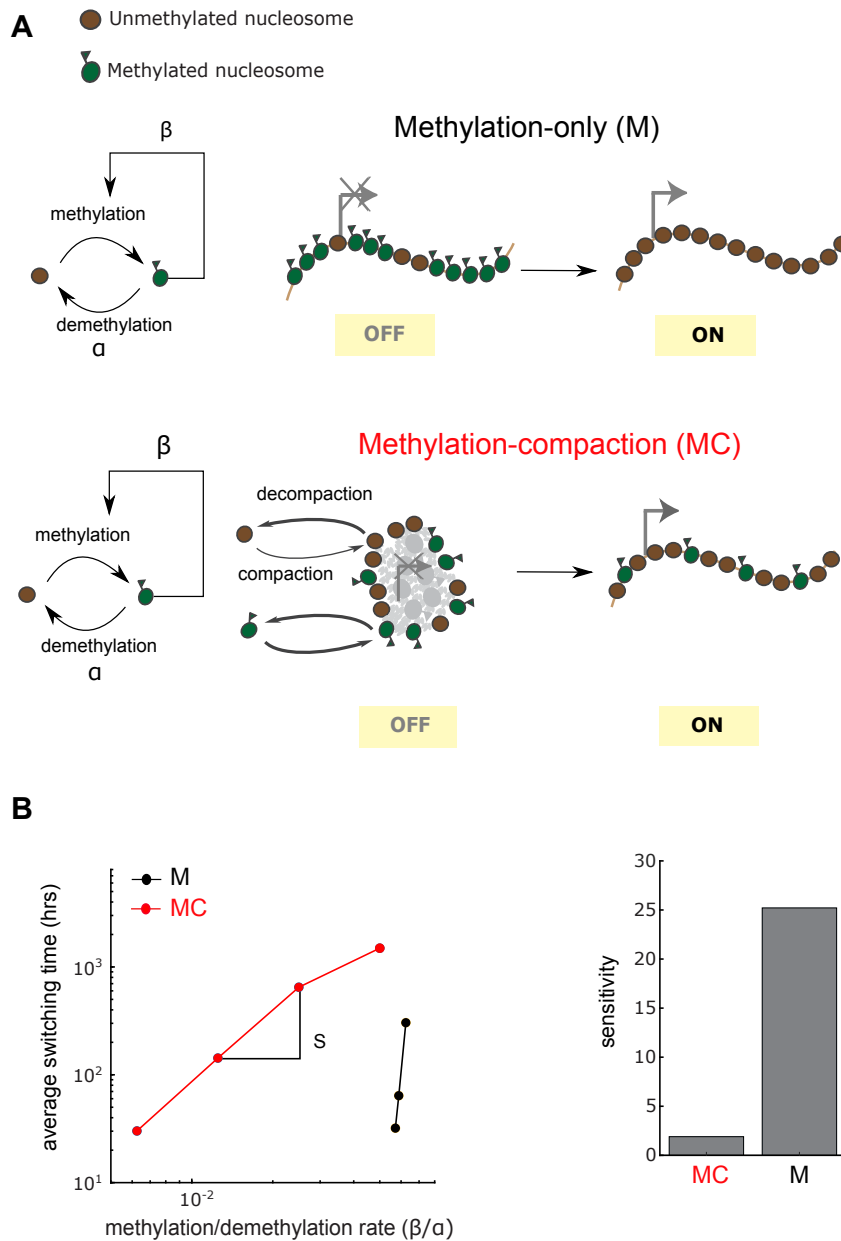

**Supplemental Figure 3. A methylation-compaction mechanism, with cooperative methylation dynamics, also shows enhanced tunability in activation timing compared to the methylation-only model.** (A) Top - Methylation model enables gene activation via complete eviction of methylation marks. Bottom - Methylation compaction model with cooperative methylation rate. A nucleosome's methylation rate increases with the number of methylated nucleosomes in the system. (B) Average switching times as a function of methylation ( $\beta$ ) and demethylation rate constant ( $\alpha$ ) ratio for the methylation (black) and methylation compaction (red) models. Tunability coefficient ( $\Delta \log Y / \Delta \log X$ ) for each plot was calculated by taking the slope of the linear fit  $y = ax + b$  for the methylation model data set and the last 5 data points for the compaction model.

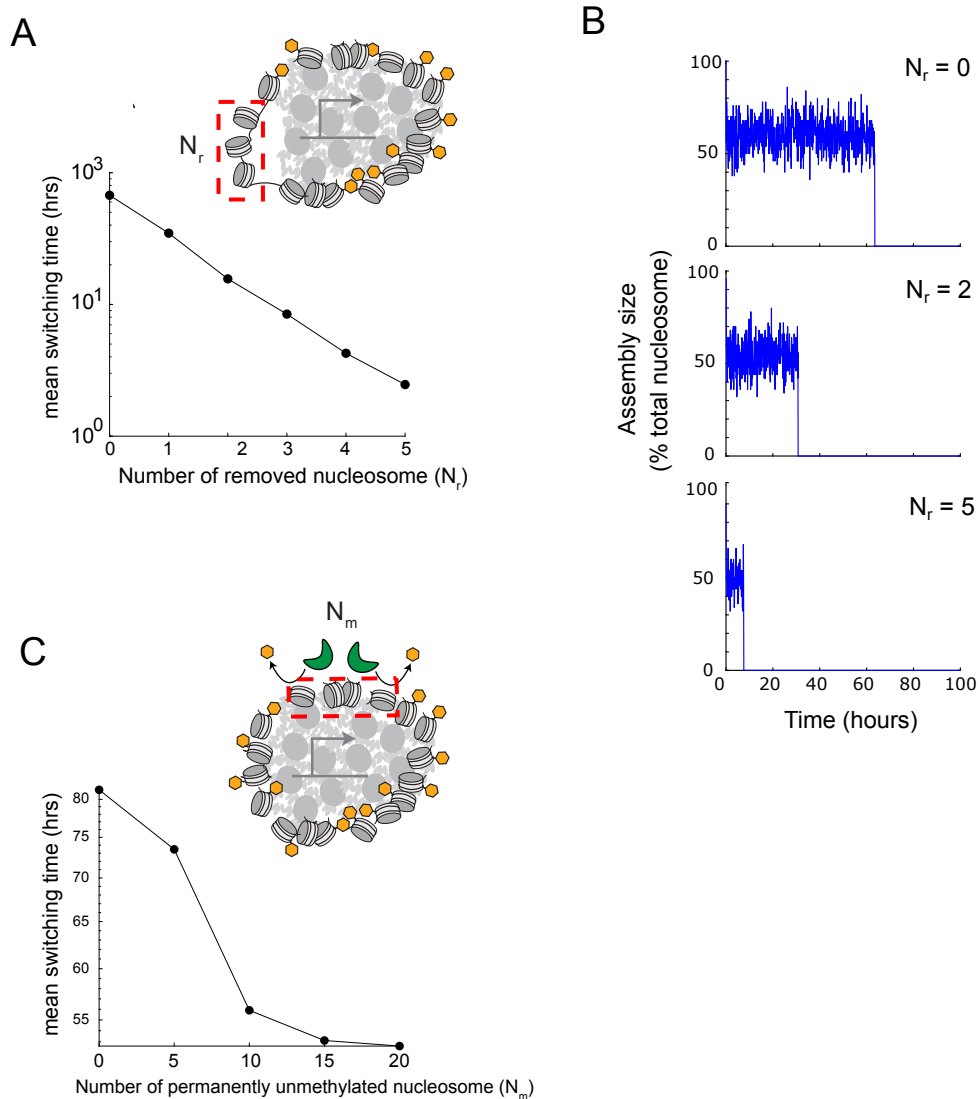

**Supplementary Figure 4. Local disruptions in nucleosomal methylation or compaction, caused by transcription factor binding, generates tunable changes in activation time.** Simulations of the methylation-compacted mechanism were performed where a fixed number of nucleosomes were either blocked from entering a compacted assembly (A,B), or from acquiring H3K27me3 marks (C). (A) Mean activation timing of the methylation compaction model (MC) as a function of number of removed nucleosome from the original domain size of 50. B) Time evolution of compaction state in one sample simulation with indicated number of removed nucleosome. C) Mean activation timing of the MC model as number of non-methylatable nucleosome increases.

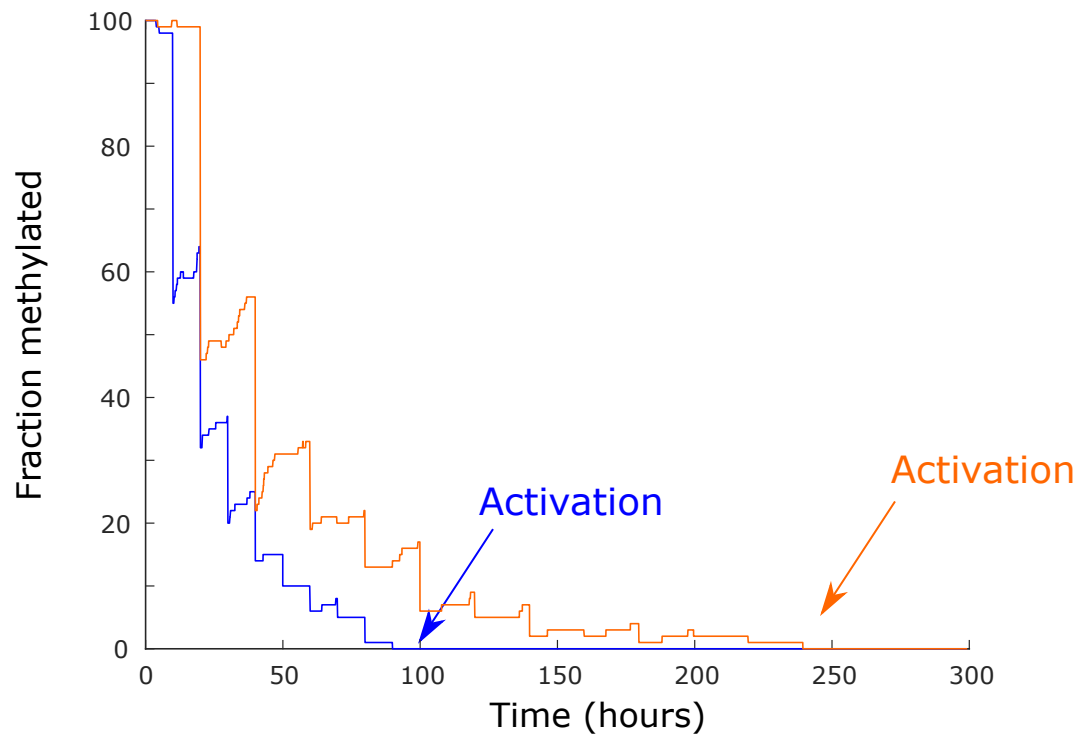

**Supplementary Figure 5. Modeling of H3K27me3 passive dilution with minimal methylation and demethylation shows a significant dependence of activation time on cell cycle length.** Fractions of methylated histone are shown for the methylation only model with cell division lengths set to be 10 hrs (blue) and 20 hrs (orange). Methylation and demethylation rates were set to 0.001 per hour (See Mathematical Analysis for more detail).



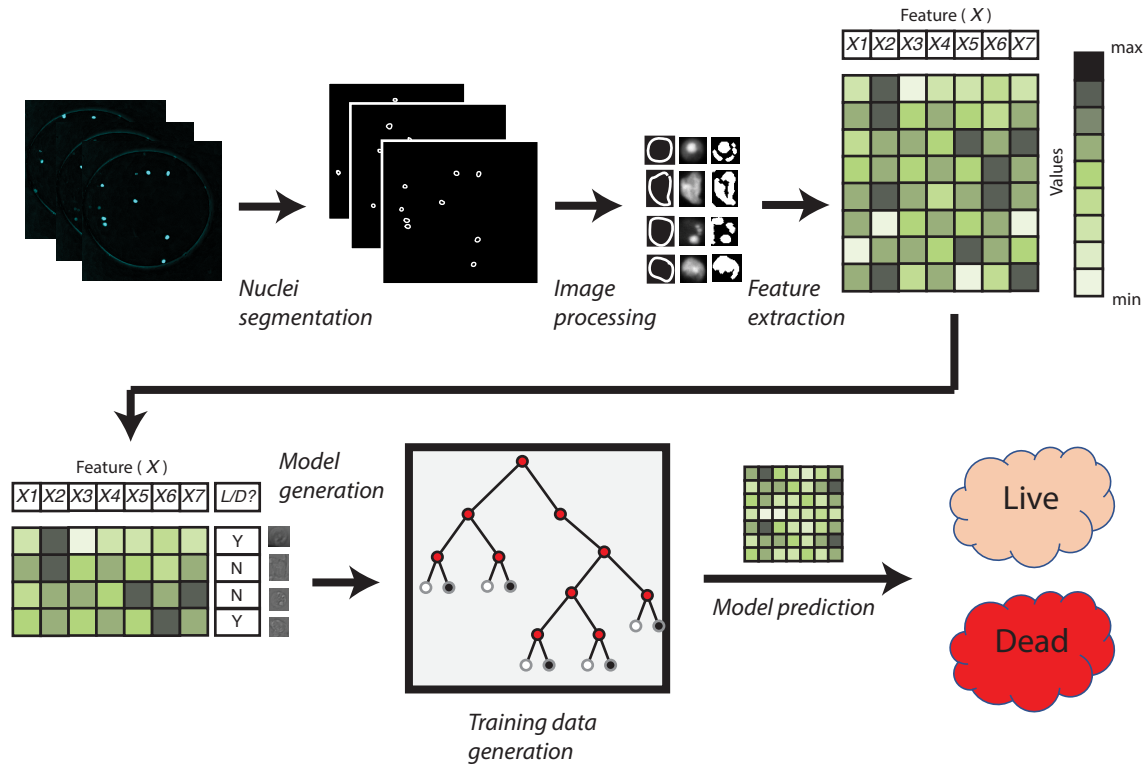

**Supplementary Figure 6. Image processing pipeline for identification of live and dead cells in imaging experiments.** Cyan fluorescent protein (CFP) signals from transduced cells are used for segmentation of individual cell. Segmented populations are analyzed using imaging processing tools in MATLAB, and specific features such as object area, perimeter, and CFP intensity are collected. Approximately 10% of the total individual cell are then manually labeled as live or dead and fed into classification tree machine learning algorithm to generate a classification model. The rest of segmented cells are classified subsequently via the trained model.

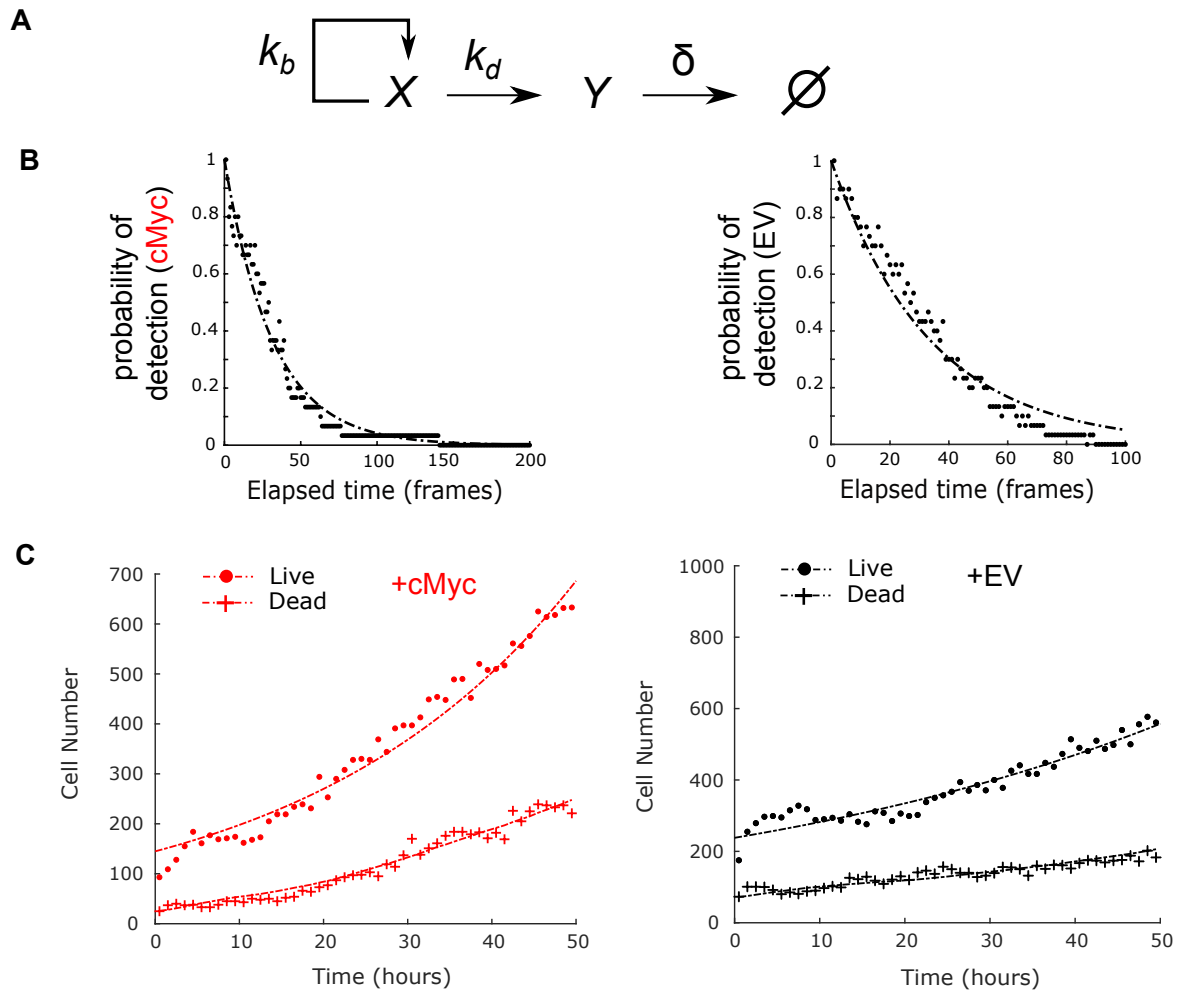

**Supplemental Figure 7. Mathematical model for disentangling cell division and death rates in cells subject to timelapse imaging.** (A) Mathematical model describing the population dynamics of dual-color Bcl11b cells transfected with cMyc and empty vector (EV). The model includes a population of live cells ( $X$ ) with a birthrate  $k_b$  and a death rate  $k_d$  the generate the dead cell population ( $Y$ ). This population then has a permanent clearance rate of  $\delta$ , indicating the process in which these cells' CFP degrade, and the dead cells become undetected. (B) Experimentally determined decay of dead cells' detectability in time-lapsed movies. Individual dead cells were followed until their CFP level completely diminished to the point of undetection by the segmentation algorithm, and the elapsed time was recorded. Thirty different individuals cells were recorded for each cMyc and empty vector populations. Data was fit to an exponential decay function  $P(\tau) = e^{-\delta\tau}$  with  $\delta = 0.032$  per frame for cMyc and  $\delta = 0.030$  per frame for EV population. (C) Representative time evolution of cell number in live and dead cell populations in one live-imaging experiment. Dual-color Bcl11b DN2 progenitors were transfected with cMyc and empty vector expressing retroviral vector. Transfected Bcl11b YFP-/RFP+ cells were cultured on DL1 + retronectin coated plates and activation of YFP allele was monitored. Representative live and dead population dynamics of cMyc (red) and empty vector (black) populations from one movie were shown on the right. Data was fitted to population dynamics model described in (A).

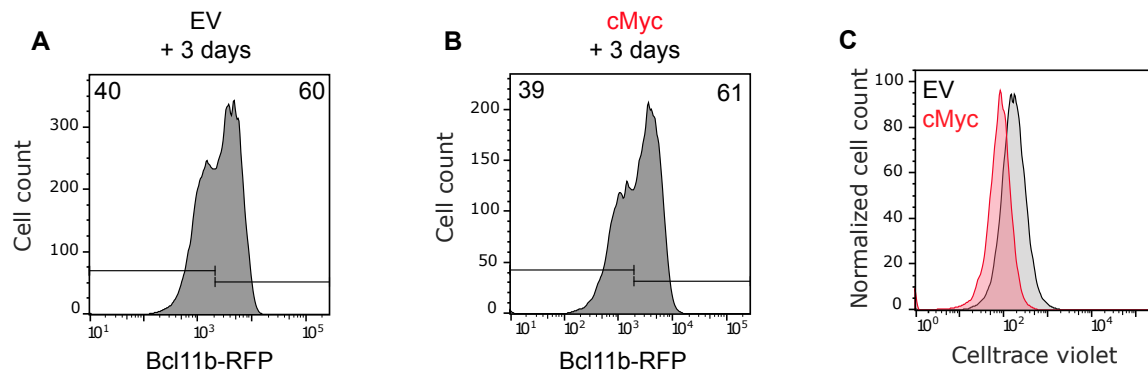

**Supplemental Figure 8. *Bcl11b* activation timing is independent of cell division rate in OP9-DL1 culture system.** *Bcl11b*<sup>YFP+/RFP-</sup> DN2 progenitors were transduced with a CFP-expressing empty vector (A) or cMyc (B) retrovirus, sorted and cultured on OP9-DL1 stromal layers with 5 ng/mL IL-7 and Flt3L. RFP allele activation was analyzed 72 hours later via flow cytometry. Plots show similar *Bcl11b* activation percentages in EV versus cMyc-transduced cells. (C) CellTrace Violet profiles of cMyc (red) and empty vector (grey) population confirm faster division rate of cMyc overexpressing cells.

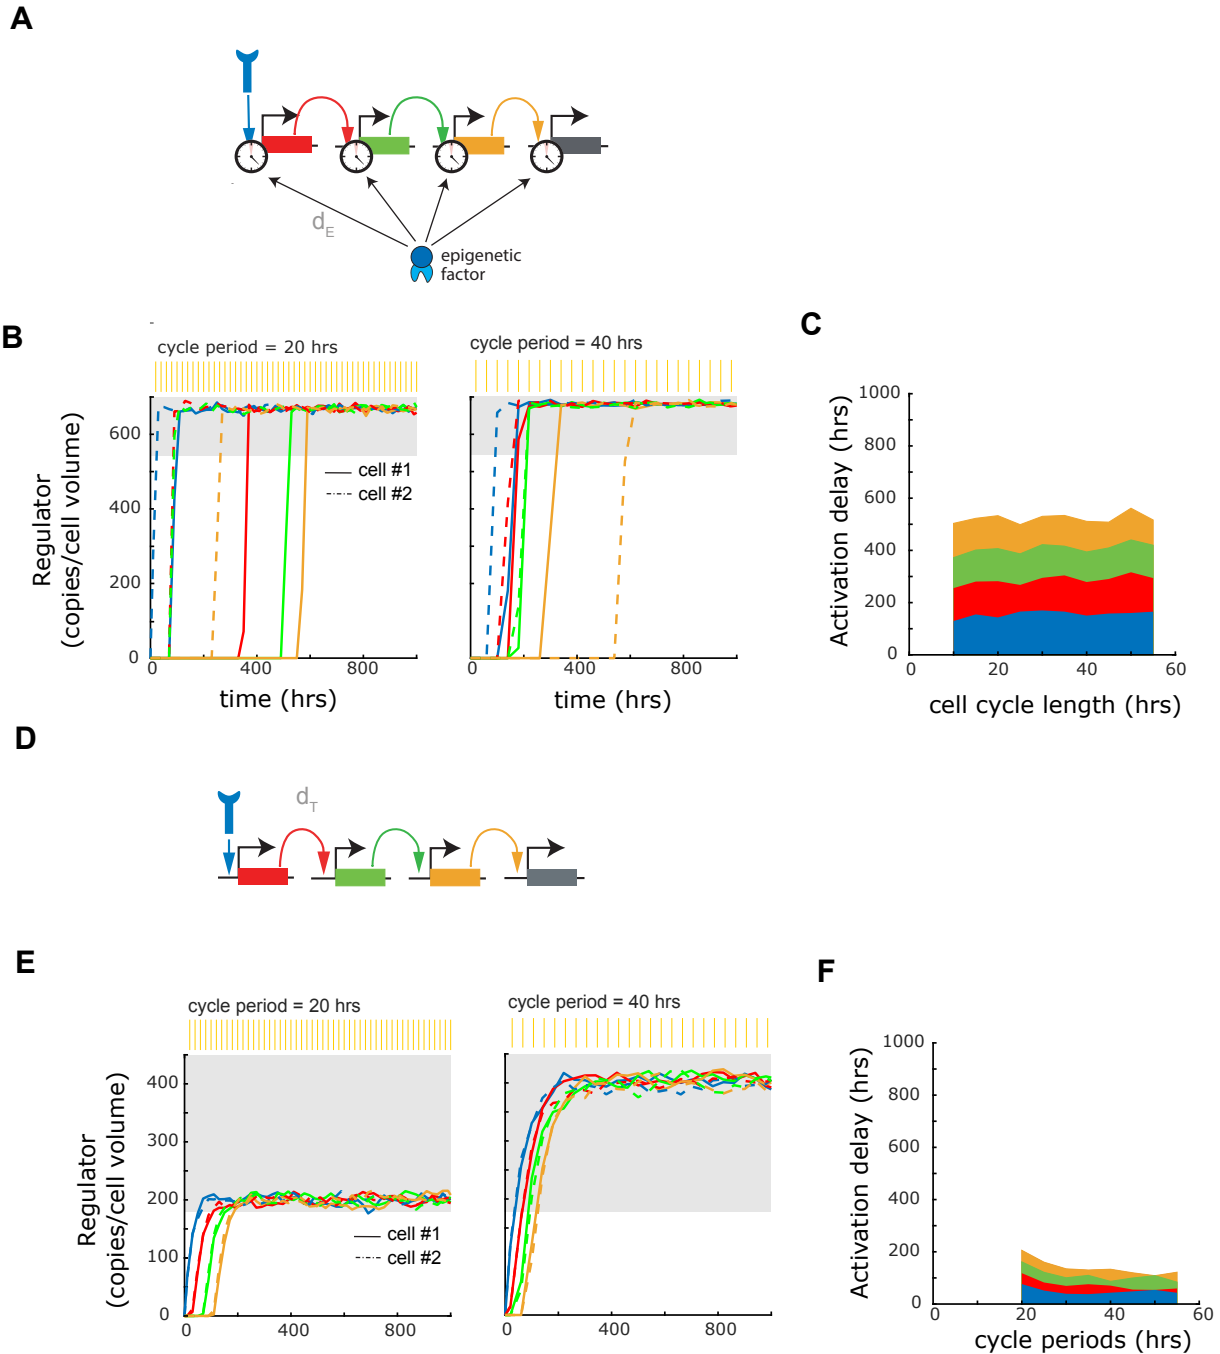

**Supplementary Figure 9. Developmental gene networks built from epigenetic timers can set temporal schedules that are independent of cell division.** Cascade of activated genes each controlled by an polycomb-based timer (“E”) with a delay parameter  $d_E$  (A) or a classical regulation timer with a delay parameter  $d_T$  (D). (B and E, top) Stochastic simulations in two cells (solid and dashed lines) with faster (once every 20 hrs, left) and slower (once every 40 hrs, right) cell cycling rates. (C and F) Activation delay, Activation delay for each gene, defined as the time it takes for 85% of cells to reach its “ON” state in a given population, as a function of cell cycle period.

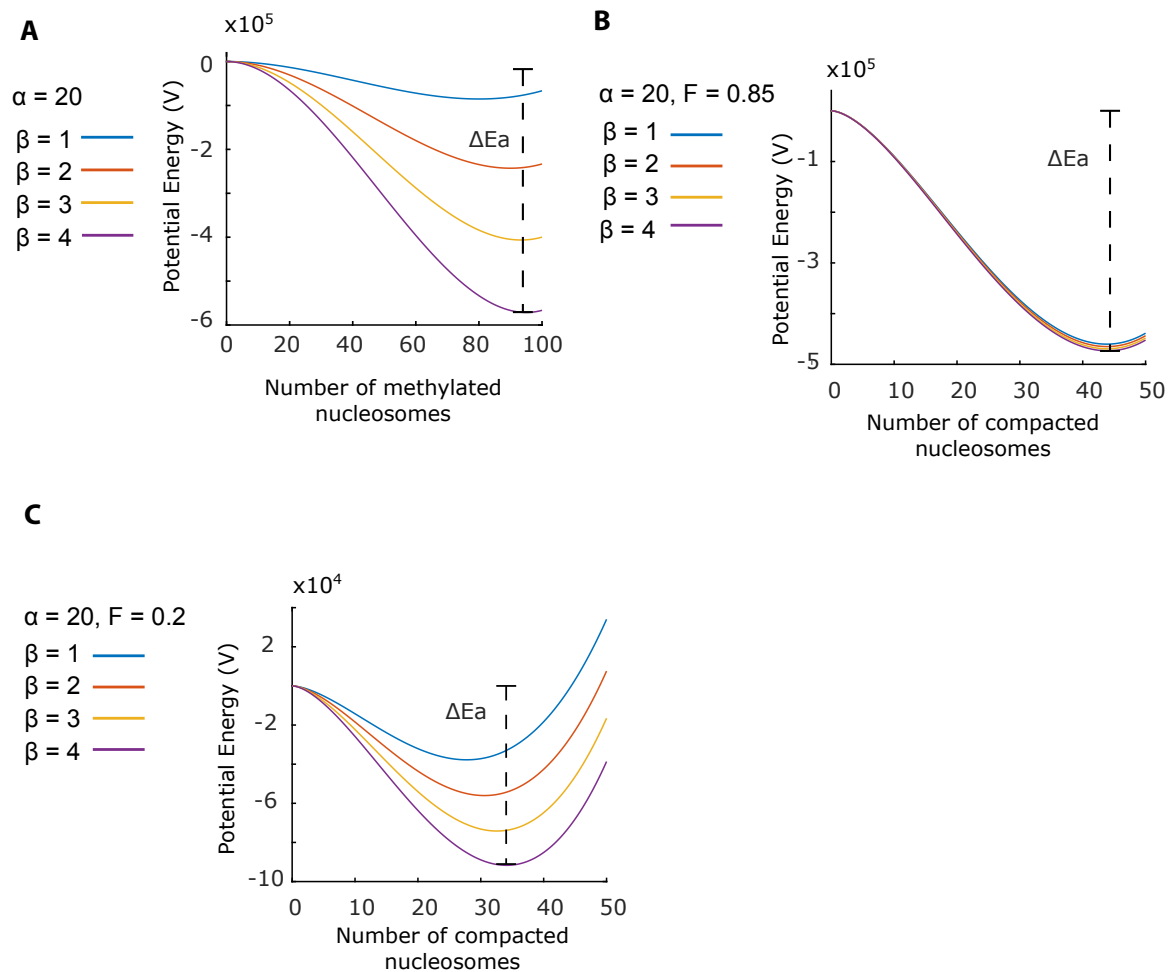

**Supplementary Figure 10. Activation energy is robust to changes in methylation rate when interaction affinities between methylated and demethylated nucleosomes are similar.** (A) Potential energy landscapes of methylation model (M). (B-C) Potential energy landscapes of the methylation-compaction model (MC). Parameter  $F$  dictating the compaction affinity reduction in demethylated nucleosome in the MC model was set to 0.85 (B) and 0.1 (C). Activation energy barrier ( $E_a$ ) is defined as the potential energy ( $V$ ) height between the local maximum and local minimum of the potential energy landscape. Each potential curve was plotted with demethylation parameter = 20  $\text{hrs}^{-1}$  and methylation rate parameter as indicated by the curve's color (See Mathematical Appendix).

| cMyc    |                         |         |                         |         |                                   |         |
|---------|-------------------------|---------|-------------------------|---------|-----------------------------------|---------|
|         | Live Rate ( $K$ )       | 95% CI  | Death Rate ( $k_d$ )    | 95% CI  | Division Rate ( $k_b = K + K_d$ ) | 95% CI  |
| Trial 1 | 0.031 hrs <sup>-1</sup> | ± 0.001 | 0.034 hrs <sup>-1</sup> | ± 0.001 | 0.065 hrs <sup>-1</sup>           | ± 0.001 |
| Trial 2 | 0.043 hrs <sup>-1</sup> | ± 0.001 | 0.013 hrs <sup>-1</sup> | ± 0.000 | 0.057 hrs <sup>-1</sup>           | ± 0.001 |
| Trial 3 | 0.035 hrs <sup>-1</sup> | ± 0.001 | 0.027 hrs <sup>-1</sup> | ± 0.001 | 0.069 hrs <sup>-1</sup>           | ± 0.001 |

| EV      |                         |         |                         |         |                                   |         |
|---------|-------------------------|---------|-------------------------|---------|-----------------------------------|---------|
|         | Live Rate ( $K$ )       | 95% CI  | Death Rate ( $k_d$ )    | 95% CI  | Division Rate ( $k_b = K + K_d$ ) | 95% CI  |
| Trial 1 | 0.017 hrs <sup>-1</sup> | ± 0.001 | 0.028 hrs <sup>-1</sup> | ± 0.001 | 0.045 hrs <sup>-1</sup>           | ± 0.001 |
| Trial 2 | 0.014 hrs <sup>-1</sup> | ± 0.001 | 0.007 hrs <sup>-1</sup> | ± 0.001 | 0.027 hrs <sup>-1</sup>           | ± 0.001 |
| Trial 3 | 0.024 hrs <sup>-1</sup> | ± 0.001 | 0.019 hrs <sup>-1</sup> | ± 0.001 | 0.043 hrs <sup>-1</sup>           | ± 0.001 |

**Table 1. Tabulated doubling ( $K$ ) and death ( $k_d$ ) rates calculated from data fitting of live and dead populations from three independent imaging experiments.** Data was fitted to population dynamics model described in Statistical and Quantitative Analysis section.

## MATHEMATICAL APPENDIX

### **Part I: Modeling of the polycomb-dependent epigenetic timer**

#### **Introduction**

To understand the epigenetic timer controlling the *Bcl11b* activation, we used mathematical modeling to analyze a series of candidate biophysical mechanisms. In this modeling, we seek to explain the central emergent properties of the switch, namely (1) its irreversible, all-or-none nature; (2) its long, stochastic time delay; (3) the heritability of its inactive and active states over DNA replication; and (4) its tunability with respect to changes in H3K27me3 levels and modifying-enzyme activity.

We consider two candidate mechanisms. In the methylation only mechanism (Model I), individual nucleosomes within in a one-dimensional lattice can be methylated or unmethylated. Gene expression is assumed to occur when the total fraction of methylated nucleosomes in this lattice falls below a threshold value. In the coupled methylation compaction mechanism (Model II), individual nucleosomes are also methylated and demethylated; in addition, these nucleosomes also interact to form a compacted assembly with rates dependent on the H3K27me3 marking. Unlike Model I, gene expression does not depend directly on H3K27me3 levels, but on the compaction state of the nucleosome assembly, which in turn depends on methylation states of individual nucleosomes. Both models explicitly model DNA replication as a process involving random segregation of modified nucleosomes into daughter strands. From our analysis, we find that the methylation-compaction mechanism alone explains the observed emergent behaviors of the *Bcl11b* epigenetic timer, and thus represents our favored model for its underlying mechanism.

#### **Model I: The Methylation Only Mechanism (M)**

We adopt a standard framework for histone modification dynamics previously shown to generate multi-stability (Angel et al., 2011; Dodd et al., 2007). In this model, individual nucleosomes reside in a one-dimensional lattice, and exist in two states, a methylated state, corresponding to an H3K27 tri-methylated state, and demethylated state. We do not describe multiple demethylated states in our model (i.e. mono-methylation, di-methylation, and an un-methylated state), though our theoretical analysis, together with previous work (Dodd et al., 2007), indicates that our main conclusions hold in more complex models with additional states. As with previous models, the methylation rate of a given nucleosome depends on the number and distance of methylated nucleosomes in its vicinity, reflecting observations that PRC2 can bind and be activated by H3K27me3-marked nucleosomes to write H3K27me3 on neighboring nucleosomes. Demethylation is taken to occur at a first order rate. In this model, we assume there is no spontaneous methylation in the absence of existing methylated nucleosomes; thus, once all nucleosomes are demethylated, no more remethylation is possible and the system enters an irreversibly activated state.

*Methylation.* We explicitly model mark binding and cooperative activities of the PRC2 complex, as well as the methylation state of each individual nucleosome. Let  $p_i$  be the methylation state of the  $i$ th nucleosome.  $p_i = 0$  denotes the de-methylated state while  $p_i = 1$  denotes the methylated state.

Let  $u'$  and  $u$  denote the transitions between the methylation state and demethylation state, respectively. The model is set up as follows:

For  $i \in \{1, \dots, 100\}$ :

$$u': p_i[0] \rightarrow p_i[1]$$

$$u: p_i[1] \rightarrow p_i[0]$$

With:

$$Pr(u') = \beta_{ON} \cdot (1 - p_i) \cdot \sum_{j \neq i} p_j \cdot e^{\left(\frac{j-i}{L}\right)^2} \quad (1)$$

$$Pr(u) = \alpha_{OFF} \cdot p_i \quad (2)$$

The parameter  $L$  can be interpreted as the ‘reach’ of the PRC2 complex to neighboring nucleosomes. Large value of  $L$  indicates a long length scale for interaction with nearby nucleosomes. This effect is set to have a gaussian shape so that nucleosome closest to the anchored PRC2 complex has the highest methylation rate. Similar distributions of activity have been reported for artificially tethered enzymes (Hass et al., 2015), as well as for histone modifications around transcription factor binding sites (Heinz et al., 2010). Moreover, we assume periodic boundary conditions for the one-dimensional lattice, though similar results were observed with other non-repeating boundary conditions (not shown).

*Cell division.* To model the transmission of histone marks across cell divisions, we assume that methylated nucleosomes segregate randomly to the two daughter DNA strands upon replication; thus, each nucleosome position has a probability  $p = 0.5$  of inheriting a nucleosome that is methylated. Experimental evidence suggests that approximately 50% of total global H3K27me3 partitioning of parental marks to the subsequent generations (Alabert et al., 2015).

From stochastic simulations of this model, we find that this methylation only mechanism can generate a slow, heritable, and stochastic gene switch (see Results and Fig. 4); however, switching times are hypersensitive to mild changes to methylation and de-methylation rates, and therefore inconsistent with experimental results. To understand the origins of this hypersensitivity, we reformulate this model using a chemical kinetics framework amenable to analysis using transition state theory. By considering the limit where  $L \rightarrow \infty$ , such that each H3K27me3-bound PRC2 methylates all other un-methylated nucleosomes with the same reaction rate. In this limit, given  $N$  as number of unmethylated nucleosome, we can completely describe the state of the system by the number of methylated nucleosomes  $N'$ . As the rates of adding or subtracting one methylated nucleosome from the system would reduce to become a function of  $N'$ , independent of spatial arrangement:

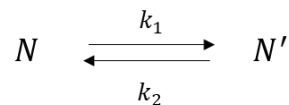

where

$$k_1 = \beta N' (N_T - N') \quad (3)$$

$$k_2 = \alpha N' \quad (4)$$



and  $N_T$  is the total number of nucleosomes. The master equation describing the time evolution of this system is given by:

$$\frac{\partial p_n}{\partial t} = -[k_1(n) + k_2(n)] \cdot p_n + k_1(n-1)p_{n-1} + k_2(n+1)p_{n+1} \quad (5)$$

where  $p_n$  is the probability of having  $N'$  methylated nucleosomes. When the total number of nucleosomes is large, we can approximate the number of methylated nucleosomes to be a continuous variable  $x$ . In this limit, we can rewrite the master equation as Fokker-Planck equation:

$$\frac{\partial p(x, t)}{\partial t} = \frac{\partial}{\partial x} [v(x)p(x)] + \frac{1}{2} \cdot \frac{\partial^2}{\partial x^2} [D(x)p(x)] \quad (6)$$

where, we have ignored third and higher order terms, and where:

$$v(x) = k_1(x) - k_2(x) \quad (7)$$

$$D(x) = k_1(x) + k_2(x) \quad (8)$$

Given the velocity and diffusion constants for this system as a function of methylated nucleosome number, the switching of the system is essentially given by the first-passage time of the system to reach the absorbing state  $x = 0$ . However, a closed-form solution of this first-passage time distribution for the given rate functions is hard to obtain; Nevertheless, we note that our system operates in the regime where the timescales of individual methylation and demethylation reactions are much shorter than switching times for this system. In this regime, switching times are well described by the Kramer's theory for escape of a Brownian particle over a potential well (Kramers, 1940), and would thus approximately scale exponentially with the height of a potential energy barrier. We can obtain the functional form of this potential barrier by relating it to the velocity function:

$$-\frac{dV}{dx} = v(x) \quad (9)$$

From equations (3), (4), and (7), we can then integrate the system to explicitly derive the potential function:

$$V(x) = \frac{\beta}{3}x^3 + \frac{\alpha - \beta N_T}{2}x^2 + W \quad (10)$$

Where  $W$  is an arbitrary number. A plot of  $V(x)$  is demonstrated in Fig. S10A. The energy landscape possesses a local minimum at a nonzero value of  $x$ , indicating the metastable state. The landscape has a local maximum near  $x = 0$ . State switching occurs when the system reaches the absorbing state  $x = 0$ . Thus, we define  $E_a$  as the height in  $V(x)$  between the local maxima and the metastable state minima. When we plotted this potential energy for different values of  $\beta$  (Fig. S10A), we found that moderate changes in  $\beta$  led to significant changes in potential well height. As switching rates scale roughly exponentially with well height, we would expect this system would show extreme sensitivity in switching times with respect to changes in methylation rate changes.

## Model II: The Methylation Compaction Mechanism (MC)

As the methylation only mechanism above does not fully explain the tunable characteristics of the *Bcl11b* activation timer, we considered a second model, where histone methylation is coupled to chromatin compaction. Indeed, H3K27me3 has been suggested to mediate a condensed, polymerase-inaccessible chromatin conformation. For instance, the polycomb repressive complex 1 (PRC1), which binds H3K27me3 and is important for compaction and gene silencing, oligomerizes through contacts on its Bmi1 or Phc subunits (Eskeland et al., 2010; Gray et al., 2016; Isono et al., 2013; Kahn et al., 2016), and may also undergo weak, multivalent interactions on Cbx2 that result in liquid-liquid phase separation and gene silencing (Howard, 2001; Larson et al., 2017). This model consists of two main modules: (1) a H3K27 methylation and demethylation mechanism, and (2) a chromatin decompaction mechanism linked to H3K27me3 modifications, that ultimately underlies gene switching. In our description of compaction dynamics, we do not explicitly model the spatial extent of the compacted assembly; instead, we adopt a mean-field approach that is established in models of cytoskeletal polymer dynamics (Erickson and Pantaloni, 1981; Jackson and Berkowitz, 1980). With this approach, the numbers of un-methylated and methylated nucleosomes within a compacted assembly are given by  $C$  and  $C'$  respectively, along with those outside the assembly are given by  $D$  and  $D'$  respectively. As a result, the dynamical system is described by four states: 1) Compacted-Methylated 2) Compacted-Demethylated 3) Decompacted-Methylated and 4) Compacted-Demethylated:

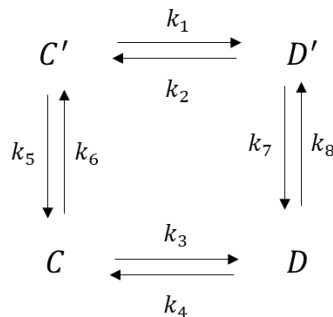

Here,  $C'$ ,  $C$ ,  $D'$ , and  $D$  denote the number of nucleosomes in these states, respectively.  $K_{1-8}$  denote the transition rates between them, which will be defined below. Gene activation is defined to be the system state where all nucleosomes exist in a decompacted state. The two mechanisms are intertwined so that methylation states affect compaction rates and vice versa. Detailed descriptions of the rates are given below:

**Methylation.** In this model, un-methylated nucleosomes convert into a methylated state with a first-order rate constant  $\beta$ . We assume this rate constant is the same regardless of whether nucleosomes are inside or outside the compacted assembly. Methylated nucleosomes convert into a demethylated state with a rate constant of  $\alpha$  if the nucleosome is outside the assembly ( $D'$ ), or a lower rate constant of  $f\alpha$ , ( $f < 1$ ) if the nucleosome is inside the assembly. This lower rate constant assumes that the demethylation reaction is less efficient on compacted nucleosomes, possibly due to competition for demethylase binding by compaction proteins, or due to the exclusion of demethylases through steric occlusion or phase separation. The rates describing these reactions on the four nucleosomal species are given by:

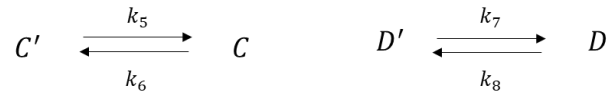

Where:

$$k_5 = f\alpha C' \quad (11)$$

$$k_6 = \beta C \quad (12)$$

$$k_7 = \alpha D' \quad (13)$$

$$k_8 = \beta D \quad (14)$$

H3K27 methylation and demethylation rates are based on the catalytic activity of the EZH2 subunit the PRC2 complex and Kdm6a/b proteins, respectively. Specifically, these rate constants were chosen to represent the conversion between H3K27me2 and H3K27me3. For simplicity, we do not model the H3K27me-binding dependent H3K27 methylation activity previously described (Margueron et al., 2009), though we show below that explicit modeling of this cooperative effect would not significantly alter the conclusion of the model. JMJD3 and UTX demethylate H3K27me3 (Agger et al., 2007), and to our knowledge no cooperative activity of these complexes have not been reported.

*Compaction.* We adopt a mean-field description of the compacted nucleosomal assembly, following kinetic models of multi-stranded cytoskeletal polymer assembly (Howard, 2001). This description assumes that the nucleosome assembly is a roughly spherical structure held together by weak, multivalent interactions between individual nucleosomes, and can add or lose individual nucleosomes at its surface. Both methylated and demethylated nucleosomes can incorporate into the assembly; thus the assembly has a total size of:

$$N_c = C + C' \quad (15)$$

where  $C$  and  $C'$  represent the number of methylated and demethylated nucleosomes in the assembly, respectively. Unlike other polymer models (MacPherson et al., 2018; Nuebler et al., 2018), we do not explicitly model physical connections between nucleosomes due to DNA; such connections would be expected to result in a spatial dependence of reaction rates within this chromatin domain; however, as the entire domain (100 nucleosomes) has a length scale greater than the persistence length of chromatin (~15-20 nucleosomes, from (Arbona et al., 2017)), and would thus enable free interactions between non-neighboring nucleosomes, we would expect the essential properties of our minimal model would also hold in a more realistic physical model that incorporates nucleosome connectedness.

The addition and removal of methylated and demethylated nucleosomes from the assembly is described by the following rate equations:

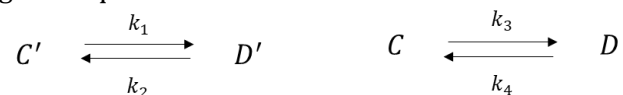

Where:

$$k_1 = \frac{\delta}{C_T^{\frac{1}{3}}} C' \quad (16)$$

$$k_2 = \lambda C_T^{\frac{2}{3}} D' \quad (17)$$

$$k_3 = \frac{\delta}{C_T^{\frac{1}{3}}} C \quad (18)$$

$$k_4 = F \lambda C_T^{\frac{2}{3}} D \quad (19)$$

if  $C_T > C_N$

$$k_1 = \frac{\delta}{C_T^{\frac{1}{3}}} C' \quad (20)$$

$$k_2 = 0 \quad (21)$$

$$k_3 = \frac{\delta}{C_T^{\frac{1}{3}}} C \quad (22)$$

$$k_4 = 0 \quad (23)$$

if  $C_T < C_N$

Here, methylated nucleosomes incorporate into the compacted assembly with a rate constant  $\lambda$ ; however, importantly, demethylated nucleosomes can also incorporate into the assembly with a reduced rate constant  $F\lambda$  (where  $F < 1$ ). The effect of methylation state on compaction rate is experimentally observed in instances such as recruitment of PRC1 complex by H3K27me3 marks (Kahn et al., 2016). The complex's subunits such as Ring1B and Phc-1 have been shown to be important in chromatin compaction and gene silencing (Eskeland et al., 2010; Francis et al., 2004; Isono et al., 2013). However, as PRC1 recruitment is not the only compaction mechanism *in vivo*, and because PRC1 can bind to nucleosomes independently of H3K27me3 (Francis et al., 2004), this model treats methylation as only a part, but not solely responsible for chromatin condensation. In choosing rate constants; we assume that compaction and decompaction is faster than histone methylation and demethylation rates, though timescales for both processes are assumed to be much faster than that for cell division. Fast compaction kinetics relative of modification is supported by *in vitro* studies of H3K27me3 methylation and demethylation kinetics, as well as *in vitro* DNA compaction by HP1 $\alpha$  and chromatin condensation experiments (Kristensen et al., 2011; Ladoux et al., 2000; Larson et al., 2017; Sneeringer et al., 2010).

The reaction rates for nucleosome incorporation (loss) scales with assembly size as  $\sim C_T^{\frac{2}{3}}$  ( $\sim C_T^{-\frac{1}{3}}$ ), as these reactions only take place on the surface of the assembly. Assuming a compacted nucleosome complex is spherical, the compaction rate would thus be proportional to the surface area. Likewise, the decompaction rate is also proportional to the surface area but reversely proportional to the total number compacted nucleosome in the complex.

In this description, there is a critical threshold number of compacted nucleosomes,  $C_N$ , below which the complex is thermodynamically unstable. The existence of a minimal nucleus size is a fundamental property of multivalent polymers, whereby addition of a new subunit to an already formed complex is thermodynamically more favorable than formation of the initial nucleus itself

(Erickson and Pantaloni, 1981; Jackson and Berkowitz, 1980). Below this critical threshold  $C_N$ , the compacted assembly disintegrates, and gene turns on.

*Cell division.* Heritability of histone marks and chromatin states are crucial in maintaining gene expression states across cellular generations. As with the methylation only model above, we assume that methylated nucleosomes partition randomly between two daughter strands upon replication; the total number of nucleated nucleosomes is then obtained by sampling from binomial distribution with  $p = 0.5$  and  $N$  equal to the total number of nucleosomes at the point of DNA replication. Furthermore, we assume that compacted nucleosomes persist within a compacted assembly reside upon passage of DNA polymerase. This model feature assumes that new nucleosomes rapidly incorporate into a compacted assembly after passage of DNA polymerase; however, in the subsequent version of this model below, we will relax this assumption to allow for disruption of compaction state by DNA polymerase passage (see below).

From Monte-Carlo simulations, we found that this methylation compaction model can recapitulate all the essential emergent properties of the *Bcl11b* activation switch. Specifically, this model shows the following dynamic properties:

- 1) *Irreversible all-or-none switching to an H3K27me3-low, de-compacted state.* From simulations, we found that the system adopts a stable compacted assembly of nucleosomes with higher H3K27me3 marking density, but switches abruptly to a de-compacted state with lower H3K27me3 levels. As there is no re-nucleation of the compacted assembly after its elimination, this de-compacted state represents an absorbing, permanently active expressing state. The abrupt decrease in the H3K27me3 levels arises because compacted nucleosomes demethylate at a lower rate; thus, upon total decompaction, the percent of methylated nucleosomes lowers to a new steady state level.
- 2) *Noise induced gene activation.* Transition to the completely decompacted state, or gene activated state, occurs via stochastic deviation of the system from its compaction meta-stable state. Activation is triggered when the system reaches below the threshold number of compacted nucleosomes.
- 3) *Tunable activation rates.* The model is able to generate a gene switch with slow, tunable activation rate. Activation delays can span many days, and can be finely adjusted by modifying methylation and demethylation rates, and/or changing H3K27me3 levels at the gene locus (Fig. 4C,G,H), as experimentally observed (Fig. 3 ). This ability to tune activation rates by changing H3K27me3 densities uniquely distinguishes the methylation compaction model from the methylation only model above, and thus represents a more plausible model for describing the activation mechanism of this switch. Why is this model uniquely tunable? In this model, locus de-compaction and gene activation are determined by a dynamic balance between rates of nucleosome entry or exit from a compacted assembly. The system still be sensitive to changes in these rates; however, as demethylated nucleosomes can still enter and exit a compacted assembly at a reduced rate, changes in the fraction of demethylated nucleosomes would cause a fine change in these entry or exit rates, and thus represent a plausible tuning parameter for controlling activation timing.

- 4) *Division-independent timing control.* When the cell cycle length is changed in this model, activation kinetics remain largely unaffected, implying that the methylation-compaction mechanism functions as a cell division-independent delay timer. These conclusions hold, as long as the dynamic methylation and compaction mechanisms operate on timescales much faster than the cell cycle length.

Why is the methylation compaction tunable? To answer this question, we adopt an approach, where we reduce this problem using the Fokker-Planck approximation, as utilized to analyze the Methylation only mechanism (Fig. S10A). The full system with both methylation and compaction reactions would correspond to diffusive motion of a particle in a three-dimensional state space describing both chemical and physical states of nucleosomes. However, to simplify this problem to gain intuition, we will first take the methylation and demethylation reactions to be fast compared to the compaction and de-compaction reactions, such that the system can be described a single parameter  $N_c$ , corresponding to the total number of compacted nucleosomes. At any given time, the number of methylated and demethylated nucleosomes in the compacted state is at quasi-steady state, with values:

$$C' = \frac{\beta}{\beta + f\alpha} \cdot C_T \quad (24)$$

and

$$C = \frac{f\alpha}{\beta + f\alpha} \cdot C_T \quad (25)$$

Similarly, assuming quasi steady-state, the number of methylated and demethylated nucleosomes in the uncompact state is given by:

$$D' = \frac{\beta}{\beta + \alpha} \cdot D_T \quad (26)$$

and

$$D = \frac{\alpha}{\beta + \alpha} \cdot D_T \quad (27)$$

Let  $N_T = C_T + D_T$ . With this approximation, the averaged rate of adding or removing a nucleosome from the compacted assembly is then given by:

$$k_{add} = k_2 + k_4 = \lambda C_T^{\frac{2}{3}} \frac{\beta}{\beta + \alpha} \cdot D_T + F \cdot \lambda C_T^{\frac{2}{3}} \frac{\alpha}{\beta + \alpha} \cdot D_T = \left( \frac{\beta}{\alpha} + F \right) \lambda C_T^{\frac{2}{3}} \cdot \frac{N_T - C_T}{1 + \frac{\beta}{\alpha}} \quad (28)$$

$$k_{remov} = k_1 + k_3 = \frac{\delta}{C_T^{\frac{1}{3}}} C' + \frac{\delta}{C_T^{\frac{1}{3}}} C = \delta C_T^{\frac{2}{3}} \quad (29)$$

Let the total number of compacted nucleosomes  $C_T$  be  $x$ . By writing down the master equation for this system, and by further applying the Fokker-Planck approximation, as performed in (5) and (6) we then have:

$$\frac{\partial p(x, t)}{\partial t} = \frac{\partial}{\partial x} [v(x)p(x)] + \frac{1}{2} \cdot \frac{\partial^2}{\partial x^2} [D(x)p(x)] \quad (30)$$

where:

$$v(x) = \delta x^{\frac{2}{3}} - \left(\frac{\beta}{\alpha} + F\right) \lambda x^{\frac{2}{3}} \cdot \frac{N_T - x}{1 + \frac{\beta}{\alpha}} \quad (31)$$

$$D(x) = \delta x^{\frac{2}{3}} + \left(\frac{\beta}{\alpha} + F\right) \lambda x^{\frac{2}{3}} \cdot \frac{N_T - x}{1 + \frac{\beta}{\alpha}} \quad (33)$$

As before, we define a potential energy for this system:

$$-\frac{dV}{dx} = v(x) \quad (34)$$

The analytical solution for the potential energy  $V(x)$  for the methylation compaction model is:

$$V(x) = \frac{3}{5} \left[ \delta - \frac{N}{1 + \frac{\beta}{\alpha}} \left(\frac{\beta}{\alpha} + F\right) \lambda \right] x^{\frac{5}{3}} + \frac{3}{8} \cdot \frac{1}{1 + \frac{\beta}{\alpha}} \left(\frac{\beta}{\alpha} + F\right) \lambda x^{\frac{8}{3}} + W \quad (35)$$

A plot of  $V(x)$  is shown in Fig. S10B-C. We found that increasing methylation rate results in a much more attenuated increase in activation energy  $E_a$  with the methylation compaction model. This confirms that the improved switching rate tunability in the MC model stems from the decreased sensitivity to changes in activation barrier height by methylation rate. This result explains why this system shows significantly more graded changes in switching times when methylation rates are changed.

This tunability of switching times with respect to histone methylation depends on the relative association strengths of demethylated and methylated nucleosomes for each other in forming a compacted assembly. In our initial simulations, demethylated nucleosomes show only a moderate decrease in affinity for other compacted nucleosomes relative to methylated nucleosome ( $F = 0.85$ ). However, when the binding strength of a demethylated nucleosome is much weaker than that of a methylated nucleosome ( $F = 0.2$ ), we find changes in potential well heights become more significant, indicating that the system loses its tunability with respect to methylation changes (see Fig. S10B-C). This prediction, that demethylated nucleosomes maintain comparable strengths of self-association for compacted assembly formation, agrees well with evidence that unmethylated nucleosomes aggregate through a variety of H3K27me-independent mechanisms (Larson et al., 2017; Strom et al., 2017).

## Model II.1: The Methylation Compaction Mechanism, with Compaction Disrupted by Division (Fig. S2)



This version of the model includes modified cellular division process in which upon replication, 50% of methylated nucleosomes become demethylated and 10% of compacted nucleosomes become uncompact. This exit of nucleosomes from a compacted assembly due to DNA replication reflects the possibility that as the DNA replication machinery enters the compacted nucleosomal structure, it creates decompaction ‘defects’ in the condensed locus because nucleosomes near the replication forks are replaced. However, we reason that such defect would have a small effect to the overall stability of the structure because, at any given time, the site of replication would only take up a small region of the entire compacted domain.

In order to simulate both changes in methylation and compaction at the point of DNA replication, we must describe probabilistically how each of the four nucleosomal species are affected: 1) The Compacted-Methylated species (C’); 2) the Compacted-Demethylated species (C); 3) the Decompacted-Methylated species (D’); and 4) the Decompacted-Demethylated species (D). Since methylation state is reduced by 50%, approximately half of Decompacted-Methylated species is transferred to Decompacted-Demethylated pool. Similarly, on average, 10% of the Compacted-Demethylated species are transferred to Decompacted-Demethylated pool due to DNA replication. Compacted-Methylated species have 50% chance to demethylate and 10% chance to decompact. Assuming these are two independent processes, this species has 5% chance to convert into Decompacted-Demethylated or Decompacted-Methylated and 45% chance to become Compacted-Demethylated. These observations are implemented as follows:

Let vector  $\mathbf{S} = [S_1, S_2, S_3, \dots, S_n]$  be the result from sampling a multinomial distribution with probabilities  $\pi_1, \pi_2, \pi_3, \dots, \pi_n$ , where  $\pi_1 + \pi_2 + \pi_3 + \dots + \pi_n = 1$ . Let  $S_i(N|\pi_1, \pi_2, \pi_3, \dots, \pi_n)$  be the  $i^{th}$  element of  $\mathbf{S}$  and  $N$  be the sample size. Let  $c', c, d', d$  be the number of compacted-methylated, compacted-unmethylated, decompact-methylated, and decompact-unmethylated nucleosomes, respectively immediately preceding the cellular division event. Partitioning of each species occurs as follows:

$$C' = S_4(c'|0.45, 0.05, 0.05, 0.45) \quad (36)$$

$$D' = S_1(d'|0.5, 0.5) + S_2(c'|0.45, 0.05, 0.05, 0.45) \quad (37)$$

$$C = S_2(c|0.1, 0.9) + S_1(c'|0.45, 0.05, 0.05, 0.45) \quad (38)$$

$$D = d + S_2(d'|0.5, 0.5) + S_1(c|0.1, 0.9) + S_3(c'|0.45, 0.05, 0.05, 0.45) \quad (39)$$

From stochastic simulations (Fig. S2), we find that this modified methylation compaction model shows similar dynamic characteristics compared to the original methylation compaction model (Model II): it shows stochastic, all-or-none switching between inactive and active states; has an activation delay that can be tuned by changing H3K27me levels and enzyme activity; and shows division-independence in its activation time delay. Thus, we conclude that the essential features of this model hold, even upon mild disruption of the inactive, compacted assembly by passage of DNA polymerase.

## Model II.2: The Methylation Compaction Mechanism with Cooperative Methylation (Fig. S3)



PRC2 is known to be allosterically activated by H3K27me3 binding via its EED subunit (Margueron et al., 2009). Here, we consider this cooperative property of PRC2 by specifying that methylation rate increases with the total number of methylated nucleosomes in the model system. This assumption is likely valid when the number of nucleosomes in the condensed structure is small, and all the nucleosomes are more or less in close proximity with each other. To simulate this, we modified the methylation rates  $K_6$  and  $K_8$  so that their magnitude has a spontaneous term  $\mu$  and the cooperative term  $\beta$  that is proportional to the total number of methylated species in the simulation:

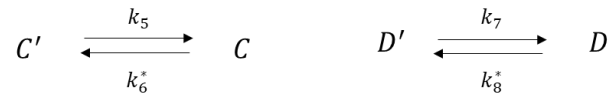

$$k_6^* = [\mu + \beta(C' + D')]C \quad (40)$$

$$k_8^* = [\mu + \beta(C' + D')]D \quad (41)$$

From stochastic simulations (Fig. S3), we find that this system is also capable of generating long, stochastic delays in all-or-none switching in locus compaction state, and that switching times can be finely tuned by changing H3K27me3 levels, as with our simpler methylation compaction model (Model II). We conclude that incorporation of a cooperative H3K27me3 methylation rate in our methylation compaction model does not alter its main conclusions.

### Model II.3: The Methylation Compaction Mechanism with Permanently Demethylated Nucleosomes (Fig. S4)

To simulate the potential effect of transcription factors on the activation timing in the methylation compaction model. We first consider a scenario where the transcription factors disable a small fraction of nucleosomes in the assembly from compacting or methylating, effectively removing them from the system. Our simulations (Fig. S4A,B) suggests that activation timing is faster with increasing number of removed nucleosome ( $N_r$ ). Therefore, timing modulation can be achieved this way although activation time is mildly sensitive to changes in  $N_r$ .

We then consider an alternative mechanism where the transcription factors act on the system by binding to a small number of nucleosomes and preventing it from being methylated but still allowing compaction. To formulate this effect, we define a sub population of nucleosomes in the system that can undergo compaction  $C_o$  and decompaction  $D_o$  but cannot be methylated:

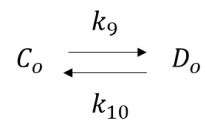

Where:

$$k_9 = \frac{\delta}{C_T^{\frac{1}{3}}} C_o \quad (42)$$

$$k_{10} = F \lambda C_T^{\frac{2}{3}} D_o \quad (43)$$

if  $C_T > C_N$

$$k_9 = \frac{\delta}{C_T^{\frac{1}{3}}} C_o \quad (44)$$

$$k_{10} = 0 \quad (45)$$

if  $C_T < C_N$

$$C_T = C_o + C + C' \quad (46)$$

$$N_T = N + N_m \quad (47) \quad \text{and}$$

$$N_m = C_o + D_o \quad (48)$$

Simulations of this system (Fig. S4C) reveals that activation timing is faster with increasing number of permanently demethylated nucleosomes. Additionally, the changes in timing is not as drastic as completely removing nucleosome from the system altogether. These results present potential mechanisms through which transcription factors could be employed to manipulate activation timing in polycomb regulated gene loci.

## **Part II: Modeling a regulatory gene circuit composed of epigenetic timers**

### **Introduction**

During development, progenitors maintain autonomous temporal schedules for differentiation to ensure proper cell expansion. These temporal schedules are precisely specified within an organism but can be scaled across species to vary organism sizes while maintaining basic tissue proportions. Here, we ask whether regulatory gene circuits built from individual timed epigenetic switches can implement temporal schedules for differentiation that are robustly defined, yet flexibly scalable, such the expression timing between each node can be modulated over a large dynamic range. We consider a simple regulatory circuit consisting of a series of genes activating in sequence, where each gene is turned on by an epigenetic timer, and in turn activates an epigenetic timer of a downstream gene. As a performance comparison, we also consider a second gene network, where genes also activate each other in sequence, but do so through classical gene regulation functions, where transcription rates are functions of the levels of upstream regulator (Estrada et al., 2016; Phillips, 2015). We model these networks at the single-cell level, performing Monte-Carlo simulations of network dynamics in single cells, where we explicitly model cell division. To analyze variability in the dynamics of these networks, both in single cells and in cohorts of developing cells, we perform this analysis over multiple cohorts of developing cell populations.

### **Model I: Regulatory network of epigenetic timer**

In our model, each cell contains a simple sequential gene network, where an initiating factor  $X_0$  initiates the sequential activation of a series of genes  $X_1, X_2, X_3$ , and  $X_4$ . In this cascade, an upstream transcription factor  $X_{i-1}$  activates a epigenetic timer for a single promoter  $P_i$  ( $i = 1, \dots, 4$ ), which sets the activation time for synthesis of its product  $X_i$ . The control of activation follows this scheme:

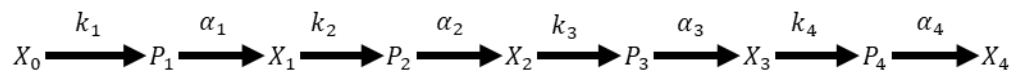

For simplicity, we assume that each cell has one copy of each gene, such that  $P_i$  is a random variable with two possible states (0 and 1). However, we expect our main conclusions to hold when multiple gene copies are present.  $X_i$  is then a random variable that represents the copy number of the product of gene  $i$  in the cell.

Take  $k_i$  to be the rate constant for activation of promoter  $i$ . We take  $k_i$  to be hyperbolic function of the concentration of upstream regulatory factor, such that:

$$k_i = \frac{K \cdot \frac{X_{i-1}}{V(t)}}{\frac{X_{i-1}}{V(t)} + K_t} \quad (49)$$

where  $K$  denotes the maximal rate of promoter activation,  $K_t$  is the concentration of transcription factor required for half-maximal promoter activation rate, and  $V(t)$  is the volume of the cell, which varies as a function of the cell cycle. Biologically,  $X_i$  could promote activation through a variety of possible mechanisms, including recruitment of H3K27me3 demethylases, inhibition of PRC2 methyltransferase activity, or any other mechanisms that would lead to a local disruption of

H3K72me3 distributions in the vicinity of transcription factor binding. In accordance with the observed properties of the *Bcl11b* epigenetic timer, we take the maximal activation rate to be less than that of cell division, and also take this rate to be independent of the rate of cell division itself, which we independently modulate below.

In addition to being modulated by specific transcription factors, H3K27me3 levels at gene loci – and, by extension, gene activation rates – can also be tuned by global activities of H3K27me3-modifying enzymes. Specifically, cells with lower H3K27me3 methylation activity will have gene loci with a higher maximal activation rate, due to low basal repressive mark level. We do not explicitly model levels of H3K27 modifying enzyme in the cell, but model effects of their change through a coordinated change in the maximal rate of gene activation  $K$ . We take the value of  $K$  to be the same for all genes in the network, and assume that changes in H3K27 modifying enzyme activity will have a coordinated effect on all loci. We define a delay parameter,  $d_E$ , as follows:

$$d_E = \frac{1}{K} \quad (50)$$

The synthesis and degradation of transcription factors  $i = 1 \dots 4$  occur with first order kinetics, with reactions and rates given by:

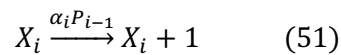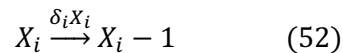

For the first equation, it can be seen that synthesis occurs only when the promoter is active. For simplicity, we set transcription rate  $\alpha_i$  and degradation rate  $\delta_i$  to be the same for all species, and we assume these rates remain fixed throughout cell cycle.

During cell division,  $X_i$  is binomially partitioned with a probability of 50% between two daughter cells upon cell division, and also inactive and active states of their promoters are stably inherited, consistent with heritable nature of the *Bcl11b* allelic expression states observed. We also assume that the level of the starting signaling molecule  $X_0$  remains constant, though we note that persistent signals are not required to maintain the states of the transcription factors after activation.

Finally, we adopt a discrete modeling approach to simulate each cell cycle separately. Taking  $n = 1 \dots N$  to be the total number of cell cycles,  $T$  to be the total number of simulated timesteps within one cycle, and  $\tau$  to be the total simulation time, we calculate  $V(\tau)$  is as follows:

$$\text{Simulation time } \tau = (n + t)\Delta t \quad (\Delta t \ll 0)$$

For  $n = 1, 2, 3, \dots, N$ :

$$V(t) = \frac{t - 1}{T} + 1 \quad (t = 1, 2, 3, \dots, T + 1) \quad (53)$$

such that the cell cycle length is  $T\Delta t$ . Note that  $V$  increases linearly between 1 and 2 at every cell cycle, and that the maximum and minimum cell volumes are not affected how the speed of cell division.

From stochastic simulations, we found that this network can give rise to a defined temporal schedule for differentiation within cohorts of developing cells, with a timescale exceeding that of

cell division (every 20 hours). Furthermore, this schedule can be concurrently lengthened or shortened by changing the global delay parameter (Fig. 6B-C). Interestingly, the timing of gene activation, defined as the time it takes for concentration of  $X_i$  to reach a given threshold level, is independent of the rate of cell division (Fig. S9A-C). These results indicate that polycomb-mediated epigenetic timers can be utilized to generate scalable temporal delays in the differentiation schedules of progenitor cells.

## Model II: Classical gene regulation network

The timing of gene expression can also be set in gene networks through use of classical gene regulation functions, where the rate of transcription is a function of the levels of upstream transcription factor. Here, we tested whether such classical regulatory gene networks are similarly capable of generating scalable differentiation schedules. We simulated a series of genes sequentially connected to each other, where each preceding gene acts as a transcriptional activator for the next gene:

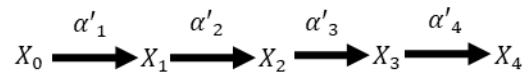

We reasoned that if interaction between transcription factor activator and the promoter is weak, it will take longer for the upstream species to accumulate to a sufficient threshold level to activate of the downstream species. The rate of transcription of gene  $X_i$  is given by:

$$k_{X_i \rightarrow X_{i+1}} = \frac{\alpha'_i \cdot \left(\frac{X_{i-1}}{V(t)}\right)^\eta}{\left(\frac{X_{i-1}}{V(t)}\right)^\eta + d_T^\eta} \quad (54)$$

Here,  $\alpha'_i$  is the maximum transcription rate achieved by the transcription activator, and  $d_T$  is the dissociation constant of the activator to the promoter. We set  $\alpha'_i$  to be the same for all species. We modeled the activation as a Hill Function with high cooperativity  $\eta$  to create a sharp threshold for switching. With this setup, gene expression of downstream species does not begin until the concentration of the activator reaches  $d_T$ , such that that increasing this parameter would ultimately lead to lengthening of activation delay. Cell volume and species' copy number dynamics as a function of cell cycle remain the same as in Model I. However, we assume that  $X_i$  is a stable proteins that only becomes removed through cell-cycle mediated dilution. This stability is required for generating differentiation schedules with timescales that exceed that of the cell division time.

Stochastic simulation of this model revealed that multi-generational delay in gene expression can be achieved with this gene network architecture (Fig. 6F, G). However, this delay is non-scalable as increasing  $d_T$  pass the steady state concentration of the upstream gene species will eventually result in a failure to activate downstream genes (Fig. 6G). As a result, activation delays set by this this network cannot be tuned beyond a limited range. Additionally, since protein degradation is tied to cell cycle division, both timing of and amplitude of gene expression are under influence of cycling time (Fig. S8D-F). Particularly, gene expression amplitude increases with lengthening cell cycle; this in turn speeds up activation of downstream species due increase in signaling molecules. In conclusion, networks built using classical gene regulation functions can set schedules over short

timescales; it does not operate well over long timescales, and cannot be scaled in time through adjustment of a global transcriptional parameter.

In summary, we find that gene regulatory networks built from individual polycomb-mediated epigenetic timers can generate robust temporal schedules for differentiation that are tunable through the control of a single parameter, namely, the strength of epigenetic repression. This network uncouples timing from both cellular division and expression magnitude. In contrast, gene regulatory networks built using classical gene regulation functions cannot generate schedules over long times, and do not facilitate scaling of these schedules independently from cell division.

### Model for progenitor differentiation dynamics

To understand whether the epigenetic timer cascade can give rise to proportional changes in the total number of output cells of different types, we integrated the gene regulatory network models above with a differentiation scheme, where progenitors generate different cell types in a progressive manner through asymmetric cell division. This scheme follows the general model described for temporal neuronal specification in flies and mammals (Rossi et al., 2017).

At every cell division, a single progenitor divides to give rise to a copy of itself and a terminally differentiated cell. The differentiated cell type is specified by the regulatory gene that has most recently activated and reached a threshold (Figure 6A). The timing to reach threshold for each gene species is extracted from gene network simulations described in the previous sections (Model I and Model II). Let  $T_{X_i}$  be the time at which gene species  $X_i$  reaches a threshold,  $t_k$  be the time of  $k^{th}$  cell division event, and  $C_i$  be the total number of differentiated cell type  $i$ . The algorithm for such an asymmetrical differentiation scheme is as follows:

For  $k = 1, 2, 3, \dots, n$ :

$$\begin{aligned} \text{If } T_{X_i} < t_k < T_{X_{i+1}}: & \quad (i = 0, 1, 2, 3) \\ C_i & \leftarrow C_i + 1 \end{aligned}$$

This process of asymmetric division continues until the progenitor turns on  $X_4$ , which causes the progenitors to stop dividing and the simulation to terminate. From our simulations, we found that timing delays generated by networks of epigenetic timer give rise scalable population size of each differentiated cell type over a wide range of delay parameters ( $d_E$ ) (Fig. 6D). Furthermore, the coefficient of variation in the numbers of different cells produced per cohort decreased steadily with increasing cohort size, indicating that this system can precisely specify the proportions of output cells with sufficient initial progenitor numbers (Fig. 6F). On the other hand, the classical regulation network lead to severely disproportionate expansion of early cells in the cascade upon increase in the timing delay parameter ( $d_T$ ) (Fig. 6H). This selective expansion occurred as later regulatory genes failed to activate, causing the arrest of earlier progenitors in a proliferative state. In summary, regulatory networks built from epigenetic timers are uniquely suited for scaling of temporal schedules and population sizes through adjustment timing control parameters.

## Parameter List

### a. Pure Methylation Model (Figure 4B-C)

| Pure Methylation Model |                                                                |                        |                                                              |
|------------------------|----------------------------------------------------------------|------------------------|--------------------------------------------------------------|
| Parameters             | Description                                                    | Value                  | Comments/references                                          |
| $\beta_{ON}$           | cooperative methylation rate constant                          | 1 hrs <sup>-1</sup>    | Sneeringer et al., 2010                                      |
| $\alpha_{OFF}$         | demethylation rate constant                                    | 16.5 hrs <sup>-1</sup> | [16, 17, 17.5] for parameter scan<br>Kristensen et al., 2011 |
| L                      | reach of anchored methylating enzyme to neighboring nucleosome | 15                     | Hass et al., 2015                                            |
| N                      | number of simulated nucleosomes                                | 100                    |                                                              |
| cell division length   | cell division length                                           | 20 hrs                 |                                                              |

### b. Compaction Methylation Model (Figure 4C,E)

| Compaction Methylation Model |                                                                       |                        |                                                                                           |
|------------------------------|-----------------------------------------------------------------------|------------------------|-------------------------------------------------------------------------------------------|
| Parameters                   | Description                                                           | Value                  | Comments/references                                                                       |
| $\beta$                      | methylation rate constant                                             | 1 hrs <sup>-1</sup>    | [0.2, 0.4, 0.8, 1.6, 3.2, 6.4] for parameter scan in figure 4C<br>Sneeringer et al., 2010 |
| $\alpha$                     | demethylation rate constant                                           | 8 hrs <sup>-1</sup>    | Kristensen et al., 2011                                                                   |
| f                            | fraction of de-methylation rate when nucleosome is in compacted state | 0                      |                                                                                           |
| $\lambda$                    | compaction rate constant                                              | 310 hrs <sup>-1</sup>  | Larson et al., 2017; Ladoux et al., 2000                                                  |
| $\delta$                     | decompaction rate constant                                            | 5300 hrs <sup>-1</sup> | Larson et al., 2017; Ladoux et al., 2000                                                  |
| F                            | fraction of compaction rate when nucleosome is in demethylated stated | 0.85                   |                                                                                           |
| N                            | Number of simulated nucleosomes                                       | 50                     |                                                                                           |
| $C_N$                        | nucleation threshold for compacted nucleosomal complex                | 5                      |                                                                                           |
| cell division length         | cell division length                                                  | 20 hrs                 |                                                                                           |

### c. Pure Dilution and Noise vs induced Decompaction Models (Figure 5 A-B)

| Pure Dilution Model          |                                                                       |                        |                                                      |
|------------------------------|-----------------------------------------------------------------------|------------------------|------------------------------------------------------|
| Parameters                   | Description                                                           | Value                  | Comments/references                                  |
| $\beta_{ON}$                 | cooperative methylation rate constant                                 | 0                      |                                                      |
| $\alpha_{OFF}$               | demethylation rate constant                                           | 0                      |                                                      |
| L                            | reach of anchored methylating enzyme to neighboring nucleosome        | 0                      |                                                      |
| N                            | number of simulated nucleosomes                                       | 100                    |                                                      |
| cell division length         | cell division length                                                  | 20 hrs                 | [10, 15, 20, 25, 30, 35] for cycle scan in Figure 5B |
| Compaction Methylation Model |                                                                       |                        |                                                      |
| Parameters                   | Description                                                           | Value                  | Comments/references                                  |
| $\beta$                      | methylation rate constant                                             | 1 hrs <sup>-1</sup>    | Sneeringer et al., 2010                              |
| $\alpha$                     | demethylation rate constant                                           | 8 hrs <sup>-1</sup>    | Kristensen et al., 2011                              |
| f                            | fraction of de-methylation rate when nucleosome is in compacted state | 0                      |                                                      |
| $\lambda$                    | compaction rate constant                                              | 310 hrs <sup>-1</sup>  |                                                      |
| $\delta$                     | decompaction rate constant                                            | 5300 hrs <sup>-1</sup> |                                                      |
| F                            | fraction of compaction rate when nucleosome is in demethylated stated | 0.85                   |                                                      |
| N                            | Number of simulated nucleosomes                                       | 50                     |                                                      |
| $C_N$                        | nucleation threshold for compacted nucleosomal complex                | 5                      |                                                      |
| cell division length         | cell division length                                                  | 20 hrs                 | [10, 15, 20, 25, 30, 35] for cycle scan in Figure 5B |

### d. Polycomb-based timer model and classical regulation timer model (Figure 6)

| Polycomb-based timer model       |                                                        |                                  |                                                                      |
|----------------------------------|--------------------------------------------------------|----------------------------------|----------------------------------------------------------------------|
| Parameters                       | Description                                            | Value                            | Comments/references                                                  |
| $d_E$                            | global epigenetic switching rate delay                 | 25 and 66.66 hrs                 | [100, 66.67, 50, 40, 33.33, 28.57, 25, 22.22, 20] for parameter scan |
| kt                               | dissociation constant of polycomb transcription factor | 400 copies / cell volume         |                                                                      |
| $\alpha$                         | transcriptional rate                                   | 1000 copies hrs <sup>-1</sup>    | Schwanhäusser, B. et al., 2011                                       |
| $\delta$                         | degradation rate                                       | 1 copies hrs <sup>-1</sup>       | Schwanhäusser, B. et al., 2011                                       |
| cell division length             | cell division length                                   | 20 hrs                           |                                                                      |
| Classical regulation timer model |                                                        |                                  |                                                                      |
| Parameters                       | Description                                            | Value                            | Comments/references                                                  |
| $d_T$                            | dissociation constant of transcription factor          | 150 and 200 copies / cell volume | [20, 40, 60, 80, 100, 120, 140, 160, 175] for parameter scan         |
| $\alpha'$                        | transcription rate constant                            | 10 copies hrs <sup>-1</sup>      | Schwanhäusser, B. et al., 2011                                       |
| $\eta$                           | Hill coefficient                                       | 50                               |                                                                      |
| cell division length             | cell division length                                   | 20 hrs                           |                                                                      |

**e. Compaction Methylation Model with Compaction State Affected by Cell Division (Supplementary Figure 2)**

| Compaction Methylation Model with Compaction State Affected by Cell Division |                                                                       |                        |                                                                                                        |
|------------------------------------------------------------------------------|-----------------------------------------------------------------------|------------------------|--------------------------------------------------------------------------------------------------------|
| Parameters                                                                   | Description                                                           | Value                  | Comments/references                                                                                    |
| $\beta$                                                                      | methylation rate constant                                             | 1 hrs <sup>-1</sup>    | [0.2, 0.4, 0.8, 1.6, 3.2, 6.4] for parameter scan in Supplemental Figure 2E<br>Sneeringer et al., 2010 |
| $\alpha$                                                                     | demethylation rate constant                                           | 8 hrs <sup>-1</sup>    | Kristensen et al., 2011                                                                                |
| $f$                                                                          | fraction of de-methylation rate when nucleosome is in compacted state | 0                      |                                                                                                        |
| $\lambda$                                                                    | compaction rate constant                                              | 310 hrs <sup>-1</sup>  | Larson et al., 2017; Ladoux et al., 2000                                                               |
| $\delta$                                                                     | decompaction rate constant                                            | 5300 hrs <sup>-1</sup> | Larson et al., 2017; Ladoux et al., 2000                                                               |
| $F$                                                                          | fraction of compaction rate when nucleosome is in demethylated stated | 0.85                   |                                                                                                        |
| $N$                                                                          | Number of simulated nucleosomes                                       | 50                     |                                                                                                        |
| $C_N$                                                                        | nucleation threshold for compacted nucleosomal complex                | 5                      |                                                                                                        |
| cell division length                                                         | cell division length                                                  | 20 hrs                 | [10, 20, 25, 30, 35] for parameter scan in Supplemental Figure 2D                                      |

**f. Compaction with Cooperative Methylation Model (Supplementary Figure 3)**

| Compaction Cooperative Methylation Model |                                                                       |                                         |                                             |
|------------------------------------------|-----------------------------------------------------------------------|-----------------------------------------|---------------------------------------------|
| Parameters                               | Description                                                           | Value                                   | Comments/references                         |
| $\beta$                                  | cooperative methylation rate constant                                 | 0.02 hrs <sup>-1</sup>                  |                                             |
| $\mu$                                    | spontaneous rate constant                                             | [0.05, 0.1, 0.2, 0.4] hrs <sup>-1</sup> |                                             |
| $\alpha$                                 | demethylation rate constant                                           | 8 hrs <sup>-1</sup>                     | Kristensen et al., 2011                     |
| $f$                                      | fraction of de-methylation rate when nucleosome is in compacted state | 0                                       |                                             |
| $\lambda$                                | compaction rate constant                                              | 310 hrs <sup>-1</sup>                   | Larson et al., 2017; Ladoux et al., 2000    |
| $\delta$                                 | decompaction rate constant                                            | 5300 hrs <sup>-1</sup>                  | Larson et al., 2017; Ladoux et al., 2000    |
| $F$                                      | fraction of compaction rate when nucleosome is in demethylated stated | 0.85                                    |                                             |
| $N$                                      | number of simulated nucleosomes                                       | 50                                      |                                             |
| $C_N$                                    | nucleation threshold for compacted nucleosomal complex                | 5                                       |                                             |
| cell division length                     | cell division length                                                  | 20 hrs                                  |                                             |
| Pure Methylation Model                   |                                                                       |                                         |                                             |
| Parameters                               | Description                                                           | Value                                   | Comments                                    |
| $\beta_{ON}$                             | cooperative methylation rate constant                                 | 1 hrs <sup>-1</sup>                     | Sneeringer et al., 2010                     |
| $\alpha_{OFF}$                           | demethylation rate constant                                           | [16, 17, 17.5] hrs <sup>-1</sup>        | for parameter scan, Kristensen et al., 2011 |
| $L$                                      | reach of anchored methylating enzyme to neighboring nucleosome        | 15                                      | Hass et al., 2015                           |
| $N$                                      | number of simulated nucleosomes                                       | 100                                     |                                             |
| cell division length                     | cell division length                                                  | 20 hrs                                  |                                             |

**g. Effects of Transcription Factors on Methylation Compaction Model's Activation Timing (Supplemental Figure 4)**

| Compaction Methylation Model                                           |                                                                       |                        |                                                      |
|------------------------------------------------------------------------|-----------------------------------------------------------------------|------------------------|------------------------------------------------------|
| Parameters                                                             | Description                                                           | Value                  | Comments/references                                  |
| $\beta$                                                                | methylation rate constant                                             | 1 hrs <sup>-1</sup>    | Sneeringer et al., 2010                              |
| $\alpha$                                                               | demethylation rate constant                                           | 8 hrs <sup>-1</sup>    | Kristensen et al., 2011                              |
| $f$                                                                    | fraction of de-methylation rate when nucleosome is in compacted state | 0                      |                                                      |
| $\lambda$                                                              | compaction rate constant                                              | 310 hrs <sup>-1</sup>  | Larson et al., 2017; Ladoux et al., 2000             |
| $\delta$                                                               | decompaction rate constant                                            | 5300 hrs <sup>-1</sup> | Larson et al., 2017; Ladoux et al., 2000             |
| $F$                                                                    | fraction of compaction rate when nucleosome is in demethylated stated | 0.85                   |                                                      |
| $N$                                                                    | Number of simulated nucleosomes                                       | 50                     | [50, 49, 48, 47, 46, 45] for nucleosome removal scan |
| $C_N$                                                                  | nucleation threshold for compacted nucleosomal complex                | 5                      |                                                      |
| cell division length                                                   | cell division length                                                  | 20 hrs                 |                                                      |
| Compaction Methylation Model With Permanently demethylated Nucleosomes |                                                                       |                        |                                                      |
| Parameters                                                             | Description                                                           | Value                  | Comments/references                                  |
| $\beta$                                                                | methylation rate constant                                             | 1 hrs <sup>-1</sup>    | Sneeringer et al., 2010                              |
| $\alpha$                                                               | demethylation rate constant                                           | 8 hrs <sup>-1</sup>    | Kristensen et al., 2011                              |
| $f$                                                                    | fraction of de-methylation rate when nucleosome is in compacted state | 0                      |                                                      |
| $\lambda$                                                              | compaction rate constant                                              | 310 hrs <sup>-1</sup>  | Larson et al., 2017; Ladoux et al., 2000             |
| $\delta$                                                               | decompaction rate constant                                            | 5300 hrs <sup>-1</sup> | Larson et al., 2017; Ladoux et al., 2000             |
| $F$                                                                    | fraction of compaction rate when nucleosome is in demethylated stated | 0.85                   |                                                      |
| $N_T$                                                                  | Total number of simulated nucleosomes                                 | 50                     |                                                      |
| $N_m$                                                                  | Number of permanently demethylated nucleosome                         | 0 - 20                 | [0, 5, 10, 15, 20] for nucleosome removal scan       |
| $C_N$                                                                  | nucleation threshold for compacted nucleosomal complex                | 5                      |                                                      |
| cell division length                                                   | cell division length                                                  | 20 hrs                 |                                                      |



**h. Pure Dilution Model with Minimal Methylation and Demethylation Rates (Supplementary Figure 5)**

| Dilution Model With Minimal Enzymatic Activities |                                                                |                         |                     |
|--------------------------------------------------|----------------------------------------------------------------|-------------------------|---------------------|
| Parameters                                       | Description                                                    | Value                   | Comments/references |
| $\beta_{ON}$                                     | cooperative methylation rate constant                          | 0.001 hrs <sup>-1</sup> |                     |
| $\alpha_{OFF}$                                   | demethylation rate constant                                    | 0.001 hrs <sup>-1</sup> |                     |
| L                                                | reach of anchored methylating enzyme to neighboring nucleosome | 15                      | Hass et al., 2015   |
| N                                                | number of simulated nucleosomes                                | 100                     |                     |
| cell division length                             | cell division length                                           | 10 and 20 hrs           |                     |

**i. Cell cycle dependency of Polycomb-based timer model and Classical regulation timer model (Supplementary Figure 9)**

| Polycomb-based timer model       |                                                        |                               |                                                         |
|----------------------------------|--------------------------------------------------------|-------------------------------|---------------------------------------------------------|
| Parameters                       | Description                                            | Value                         | Comments/references                                     |
| $d_E$                            | global epigenetic switching rate delay                 | 50 hrs                        |                                                         |
| kt                               | dissociation constant of polycomb transcription factor | 400 copies / cell volume      |                                                         |
| $\alpha$                         | transcriptional rate                                   | 1000 copies hrs <sup>-1</sup> | Schwanhäusser, B. et al., 2011                          |
| $\delta$                         | degradation rate                                       | 1 copies hrs <sup>-1</sup>    | Schwanhäusser, B. et al., 2011                          |
| cell division length             | cell division length                                   | 20 and 40 hrs                 | [10, 15, 20, 25, 30, 35, 40, 45, 50, 55] for cycle scan |
| classical regulation timer model |                                                        |                               |                                                         |
| Parameters                       | Description                                            | Value                         | Comments/references                                     |
| $k'$                             | dissociation constant of transcription factor          | 150 copies / cell volume      |                                                         |
| $\alpha'$                        | transcription rate constant                            | 10 copies hrs <sup>-1</sup>   | Schwanhäusser, B. et al., 2011                          |
| $\eta$                           | Hill coefficient                                       | 50                            |                                                         |
| cell division length             | cell division length                                   | 20 and 40 hrs                 | [20, 25, 30, 35, 40, 45, 50, 55] for cycle scan         |

**g. Potential energy landscapes analysis for pure methylation model and methylation compaction model (Supplementary Figure 10)**

| Pure Dilution Model          |                                                                       |                       |
|------------------------------|-----------------------------------------------------------------------|-----------------------|
| Parameters                   | Description                                                           | Value                 |
| $\beta$                      | cooperative methylation rate constant                                 | 1-4 hrs <sup>-1</sup> |
| $\alpha$                     | demethylation rate constant                                           | 20 hrs <sup>-1</sup>  |
| N                            | number of simulated nucleosomes                                       | 100                   |
| W                            | arbitrary constant                                                    | 100                   |
| Compaction Methylation Model |                                                                       |                       |
| Parameters                   | Description                                                           | Value                 |
| $\beta$                      | methylation rate constant                                             | 1-4 hrs <sup>-1</sup> |
| $\alpha$                     | demethylation rate constant                                           | 20 hrs <sup>-1</sup>  |
| $\lambda$                    | compaction rate constant                                              | 31 hrs <sup>-1</sup>  |
| $\delta$                     | decompaction rate constant                                            | 530 hrs <sup>-1</sup> |
| F                            | fraction of compaction rate when nucleosome is in demethylated stated | 0.85                  |
| N                            | Number of simulated nucleosomes                                       | 50                    |

## Reference

Agger, K., Cloos, P.A.C., Christensen, J., Pasini, D., Rose, S., Rappsilber, J., Issaeva, I., Canaani, E., Salcini, A.E., and Helin, K. (2007). UTX and JMJD3 are histone H3K27 demethylases involved in *HOX* gene regulation and development. *Nature* 449, 731–734.

Alabert, C., Barth, T.K., Reverón-Gómez, N., Sidoli, S., Schmidt, A., Jensen, O.N., Imhof, A., and Groth, A. (2015). Two distinct modes for propagation of histone PTMs across the cell cycle. *Genes Dev.* 29, 585–590.

Angel, A., Song, J., Dean, C., and Howard, M. (2011). A Polycomb-based switch underlying quantitative epigenetic memory. *Nature* 476, 105–108.

Arbona, J.-M., Herbert, S., Fabre, E., and Zimmer, C. (2017). Inferring the physical properties of yeast chromatin through Bayesian analysis of whole nucleus simulations. *Genome Biol.* 18, 81.

Dodd, I.B., Micheelsen, M.A., Sneppen, K., and Thon, G. (2007). Theoretical Analysis of Epigenetic Cell Memory by Nucleosome Modification. *Cell* 129, 813–822.

Erickson, H.P., and Pantaloni, D. (1981). The role of subunit entropy in cooperative assembly. Nucleation of microtubules and other two-dimensional polymers. *Biophys. J.* 34, 293–309.

Eskeland, R., Leeb, M., Grimes, G.R., Kress, C., Boyle, S., Sproul, D., Gilbert, N., Fan, Y., Skoultchi, A.I., Wutz, A., et al. (2010). Ring1B Compacts Chromatin Structure and Represses Gene Expression Independent of Histone Ubiquitination. *Mol. Cell* 38, 452–464.

Estrada, J., Wong, F., DePace, A., and Gunawardena, J. (2016). Information Integration and Energy Expenditure in Gene Regulation. *Cell* 166, 234–244.

Francis, N.J., Kingston, R.E., and Woodcock, C.L. (2004). Chromatin Compaction by a Polycomb Group Protein Complex. *Science* 306, 1574–1577.

Gray, F., Cho, H.J., Shukla, S., He, S., Harris, A., Boytsov, B., Jaremko, Ł., Jaremko, M., Demeler, B., Lawlor, E.R., et al. (2016). BMI1 regulates PRC1 architecture and activity through homo- and hetero-oligomerization. *Nat. Commun.* 7, 13343.

Hass, M.R., Liow, H.-H., Chen, X., Sharma, A., Inoue, Y.U., Inoue, T., Reeb, A., Martens, A., Fulbright, M., Raju, S., et al. (2015). SpDamID: Marking DNA Bound by Protein Complexes Identifies Notch-Dimer Responsive Enhancers. *Mol. Cell* 59, 685–697.

Heinz, S., Benner, C., Spann, N., Bertolino, E., Lin, Y.C., Laslo, P., Cheng, J.X., Murre, C., Singh, H., and Glass, C.K. (2010). Simple combinations of lineage-determining transcription factors prime cis-regulatory elements required for macrophage and B cell identities. *Mol. Cell* 38, 576–589.

Howard, J. (2001). *Mechanics of Motor Proteins and the Cytoskeleton* (Sunderland, Mass: Sinauer Associates is an imprint of Oxford University Press).

Isono, K., Endo, T.A., Ku, M., Yamada, D., Suzuki, R., Sharif, J., Ishikura, T., Toyoda, T., Bernstein, B.E., and Koseki, H. (2013). SAM domain polymerization links subnuclear clustering of PRC1 to gene silencing. *Dev. Cell* 26, 565–577.

- Jackson, M.B., and Berkowitz, S.A. (1980). Nucleation and the kinetics of microtubule assembly. *Proc. Natl. Acad. Sci.* *77*, 7302–7305.
- Kahn, T.G., Dorafshan, E., Schultheis, D., Zare, A., Stenberg, P., Reim, I., Pirrotta, V., and Schwartz, Y.B. (2016). Interdependence of PRC1 and PRC2 for recruitment to Polycomb Response Elements. *Nucleic Acids Res.* *44*, 10132–10149.
- Kramers, H.A. (1940). Brownian motion in a field of force and the diffusion model of chemical reactions. *Physica* *7*, 284–304.
- Kristensen, J.B.L., Nielsen, A.L., Jørgensen, L., Kristensen, L.H., Helgstrand, C., Juknaite, L., Kristensen, J.L., Kastrop, J.S., Clausen, R.P., Olsen, L., et al. (2011). Enzyme kinetic studies of histone demethylases KDM4C and KDM6A: Towards understanding selectivity of inhibitors targeting oncogenic histone demethylases. *FEBS Lett.* *585*, 1951–1956.
- Ladoux, B., Quivy, J.-P., Doyle, P., Roure, O. du, Almouzni, G., and Viovy, J.-L. (2000). Fast kinetics of chromatin assembly revealed by single-molecule videomicroscopy and scanning force microscopy. *Proc. Natl. Acad. Sci.* *97*, 14251–14256.
- Larson, A.G., Elnatan, D., Keenen, M.M., Trnka, M.J., Johnston, J.B., Burlingame, A.L., Agard, D.A., Redding, S., and Narlikar, G.J. (2017). Liquid droplet formation by HP1 $\alpha$  suggests a role for phase separation in heterochromatin. *Nature* *547*, 236–240.
- MacPherson, Q., Beltran, B., and Spakowitz, A.J. (2018). Bottom-up modeling of chromatin segregation due to epigenetic modifications. *Proc. Natl. Acad. Sci.* *115*, 12739–12744.
- Margueron, R., Justin, N., Ohno, K., Sharpe, M.L., Son, J., Drury, W.J., Voigt, P., Martin, S.R., Taylor, W.R., De Marco, V., et al. (2009). Role of the polycomb protein EED in the propagation of repressive histone marks. *Nature* *461*, 762–767.
- Nuebler, J., Fudenberg, G., Imakaev, M., Abdennur, N., and Mirny, L.A. (2018). Chromatin organization by an interplay of loop extrusion and compartmental segregation. *Proc. Natl. Acad. Sci.* *115*, E6697–E6706.
- Phillips, R. (2015). Napoleon Is in Equilibrium. *Annu. Rev. Condens. Matter Phys.* *6*, 85–111.
- Rossi, A.M., Fernandes, V.M., and Desplan, C. (2017). Timing temporal transitions during brain development. *Curr. Opin. Neurobiol.* *42*, 84–92.
- Sneeringer, C.J., Scott, M.P., Kuntz, K.W., Knutson, S.K., Pollock, R.M., Richon, V.M., and Copeland, R.A. (2010). Coordinated activities of wild-type plus mutant EZH2 drive tumor-associated hypertrimethylation of lysine 27 on histone H3 (H3K27) in human B-cell lymphomas. *Proc. Natl. Acad. Sci. U. S. A.* *107*, 20980–20985.
- Strom, A.R., Emelyanov, A.V., Mir, M., Fyodorov, D.V., Darzacq, X., and Karpen, G.H. (2017). Phase separation drives heterochromatin domain formation. *Nature* *547*, 241–245.
